# Supplementary material for: HFIP-mediated three-component imidization of electron-rich arenes with in situ formed spiroindolenines for facile construction of 2-arylspiroindolenines
Source: Royal Society of Chemistry journal article supplement (doi:10.1039/d1qo01862k), 2022-01-01

# Supporting Information

## HFIP-mediated three-component imidization of electron-rich arenes with in situ formed spiroindolenines for facile construction of 2- arylspiroindolenines

Chunyan Ge,<sup>§</sup> Liang Wang,<sup>§</sup> Fangzhi Hu, Zhanshuai Ding, Xinyao Li, Deshuai Xiao,  
Jiayi wang, Shuai-Shuai Li\*

College of Chemistry and Pharmaceutical Sciences, Qingdao Agricultural University, Qingdao, 266109, China.

\*E-mail: flyshuaishuai@126.com

### Table of Contents

|                                                             |            |
|-------------------------------------------------------------|------------|
| <b>1. General Information.....</b>                          | <b>S2</b>  |
| <b>2. General Procedure.....</b>                            | <b>S2</b>  |
| <b>3. Characterization of Products.....</b>                 | <b>S5</b>  |
| <b>4. Crystal Structures and Data .....</b>                 | <b>S18</b> |
| <b>5. <sup>1</sup>H and <sup>13</sup>C NMR Spectra.....</b> | <b>S19</b> |

## 1. General Information

Unless otherwise noted, all reagents and solvents were purchased from the commercial sources and used as received. Thin layer chromatography (TLC) was used to monitor the reaction on Merck 60 F254 precoated silica gel plate (0.2 mm thickness). TLC spots were visualized by UV-light irradiation on Spectroline Model ENF-24061/F 254 nm. The products were purified by flash column chromatography (200-300 mesh silica gel) eluted with the gradient of petroleum ether and ethyl acetate. Proton nuclear magnetic resonance spectra ( $^1\text{H}$  NMR) were recorded on a Bruker 500 MHz NMR spectrometer ( $\text{CDCl}_3$  or  $\text{DMSO-d}_6$  solvent). The chemical shifts were reported in parts per million (ppm), downfield from  $\text{SiMe}_4$  ( $\delta$  0.0) and relative to the signal of chloroform-d ( $\delta$  7.26, singlet) or dimethyl sulfoxide-d<sub>6</sub> ( $\delta$  2.54, singlet). Multiplicities were afforded as: s (singlet); d (doublet); t (triplet); q (quartet); dd (doublets of doublet) or m (multiplets). The number of protons for a given resonance is indicated by nH. Coupling constants were reported as a *J* value in Hz. Carbon nuclear magnetic resonance spectra ( $^{13}\text{C}$  NMR) was referenced to the appropriate residual solvent peak. High resolution mass spectral analysis (HRMS) was performed on Waters XEVO G2 Q-TOF. All substituted 2-fluorobenzaldehydes, indole, 1-naphthol and sesamol were purchased from adamas-beta. All substituted *o*-aminobenzaldehydes<sup>1</sup> were prepared according to literature.

## 2. General Procedure

### 2.1 General Procedure for the Synthesis of 2-Arylspiroindolenine with the Employment of Phenols as Electron-rich Arenes

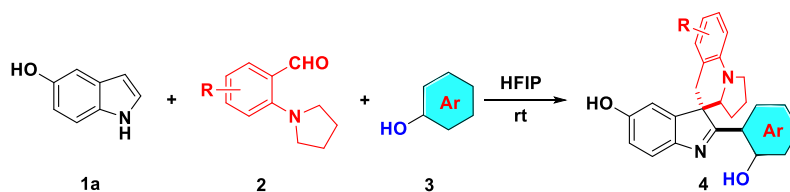

A reaction tube was charged with 5-hydroxyindole **1a** (0.1 mmol), *o*-amino benzaldehyde **2** (0.13 mmol), phenol **3** (0.15 mmol) and HFIP (1.0 mL). The mixture was stirred at room temperature under an air atmosphere. Upon completion of the reaction as indicated by TLC analysis, the mixture was concentrated in vacuum and the residue was directly purified by flash column chromatography on silica gel (eluent: ethyl acetate/petroleum ether, 1:25) to afford the desired 2-arylspiroindolenine **4**.

### 2.2 General Procedure for the Synthesis of 2-Arylspiroindolenine with the Employment of Indoles as Electron-rich Arenes

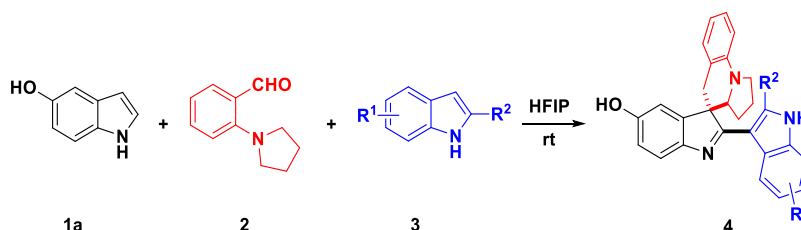

A reaction tube was charged with 5-hydroxyindole **1a** (0.1 mmol), *o*-amino benzaldehyde **2** (0.13 mmol), indole **3** (0.15 mmol) and HFIP (1.0 mL). The mixture was stirred at room temperature under an air atmosphere. Upon completion of the reaction as indicated by TLC analysis, the mixture was concentrated in vacuum and the residue was directly purified by flash column chromatography on silica

gel (eluent: ethyl acetate/petroleum ether, 1:15) to afford the desired 2-indolylspiroindolenine **4**.

### 2.3 General Procedure for the Synthesis of 2-Arylspiroindolenine with the Employment of 5-Hydroxyindole as Electron-rich Arene

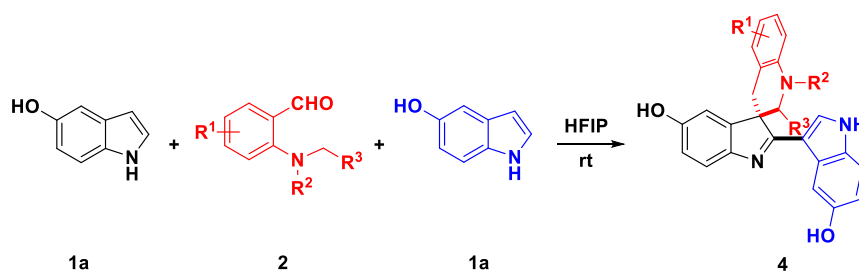

A reaction tube was charged with 5-hydroxyindole **1a** (0.24 mmol), *o*-amino benzaldehyde **2** (0.1 mmol), and HFIP (1.0 mL). The mixture was stirred at room temperature under an air atmosphere. Upon completion of the reaction as indicated by TLC analysis, the mixture was concentrated in vacuum and the residue was directly purified by flash column chromatography on silica gel (eluent: ethyl acetate/petroleum ether, 1:4) to afford the desired 2-indolylspiroindolenine **4**.

### 2.4 Large-scale synthesis

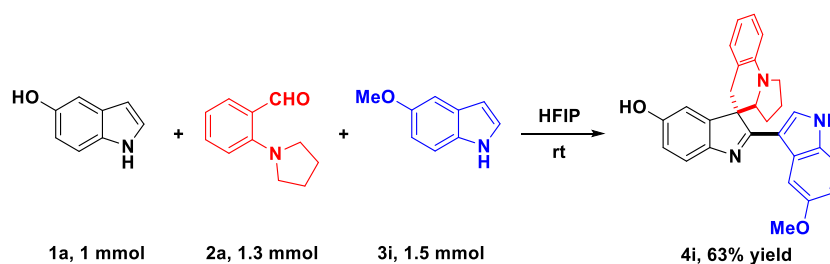

A round bottom flask was charged with 5-hydroxyindole **1a** (1.0 mmol), *o*-amino benzaldehyde **2a** (1.3 mmol), 5-methoxyindole **3i** (1.5 mmol) and HFIP (10.0 mL). The mixture was stirred at room temperature under an air atmosphere. Upon completion of the reaction as indicated by TLC analysis, the mixture was concentrated in vacuum and the residue was directly purified by flash column chromatography on silica gel (eluent: ethyl acetate/petroleum ether, 1:15) to afford the desired **4i** (286.9 mg, 63%) as a light yellow solid.

### 2.5 General Procedure for the Polyallylation of the Product 5I

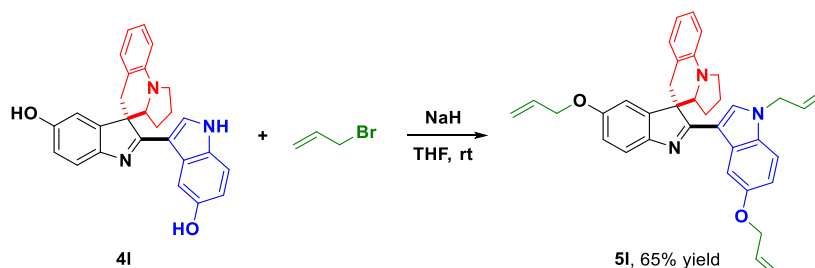

To a 10 mL reaction tube was charged with **4i** (0.05 mmol), NaH (0.3 mmol), and dry THF (2.0 mL). The tube was stirred at room temperature. Upon completion of the reaction as indicated by TLC analysis, H<sub>2</sub>O was added (5 mL) and the mixture was extracted with EtOAc (3 x 10 mL). Then the organic layers were dried with Na<sub>2</sub>SO<sub>4</sub>, and concentrated to dryness. The crude product was purified by silica gel

chromatography (eluent: ethyl acetate/petroleum ether, 1:25) to afford the polyallylated product **5i** in 65% yield as a light yellow solid.

## 2.6 General Procedure for the Conversion of the Hydroxyl Group

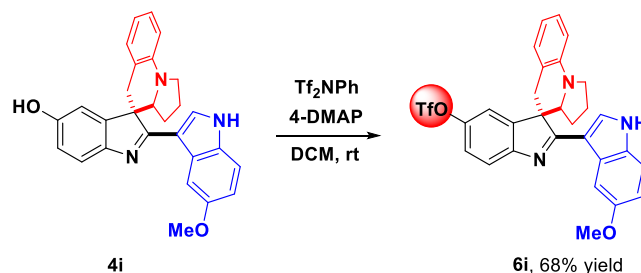

Compound **4i** (0.1 mmol) and 4-dimethylaminopyridine (0.3 mmol) were placed in a 10 mL Shrek tube. Then, the tube was purged with  $\text{N}_2$  and  $\text{CH}_2\text{Cl}_2$  (2 mL) was added. After 5 minutes, N-phenyl-bis(trifluoromethanesulfonimide) (0.2 mmol) was added and the mixture was stirred at room temperature. The reaction was monitored by thin layer chromatography eluting with  $\text{CH}_2\text{Cl}_2$ . When the starting material was consumed,  $\text{H}_2\text{O}$  was added (5 mL) and the mixture was extracted with EtOAc (3 x 20 mL). The combined organic layers were washed with brine (30 mL) and dried under anhydrous  $\text{Na}_2\text{SO}_4$ . The organic solvents were removed under reduced pressure and the residue was purified by column chromatography eluting with (eluent: ethyl acetate/petroleum ether, 1:25) to afford the desired **6i** (53.9 mg, 68%) as a light yellow solid.

## 2.7 Control experiment

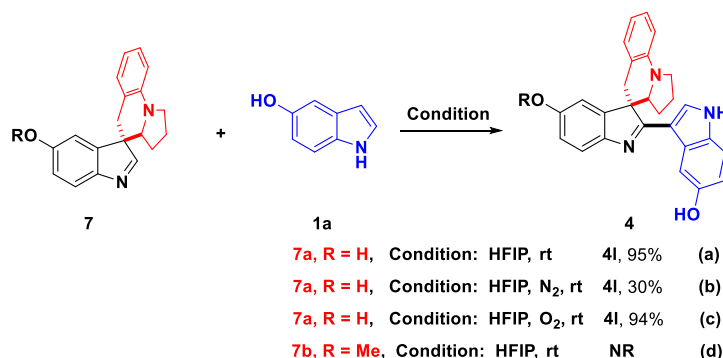

### Control experiment (a)

A reaction tube was charged with intermediate **7a** (0.1 mmol), 5-hydroxyindole **1a** (0.1 mmol), and HFIP (1.0 mL). The mixture was stirred at room temperature under an air atmosphere. Upon completion of the reaction as indicated by TLC analysis, the mixture was concentrated in vacuum and the residue was directly purified by flash column chromatography on silica gel (eluent: ethyl acetate/petroleum ether, 1:4) to afford the desired product **4i** in 95% yield as a light yellow solid.

### Control experiment (b)

A reaction tube was charged with intermediate **7a** (0.1 mmol), 5-hydroxyindole **1a** (0.1 mmol), and HFIP (1.0 mL). The mixture was stirred at room temperature under  $\text{N}_2$  atmosphere. Upon completion of the reaction as indicated by TLC analysis, the mixture was concentrated in vacuum and the residue was directly purified by flash column chromatography on silica gel (eluent: ethyl acetate/petroleum ether, 1:4) to afford the desired product **4i** in 30% yield as a light yellow solid.

### Control experiment (c)

A reaction tube was charged with intermediate **7a** (0.1 mmol), 5-hydroxyindole **1a** (0.1 mmol), and HFIP (1.0 mL). The mixture was stirred at room temperature under O<sub>2</sub> atmosphere. Upon completion of the reaction as indicated by TLC analysis, the mixture was concentrated in vacuum and the residue was directly purified by flash column chromatography on silica gel (eluent: ethyl acetate/petroleum ether, 1:4) to afford the desired product **4l** in 94% yield as a light yellow solid.

### Control experiment (d)

A reaction tube was charged with intermediate **7b**<sup>2</sup> (0.1 mmol), 5-hydroxyindole **1a** (0.1 mmol), and HFIP (1.0 mL). The mixture was stirred at room temperature under an air atmosphere. No reaction occurred by TLC analysis, albeit with prolonged reaction time.

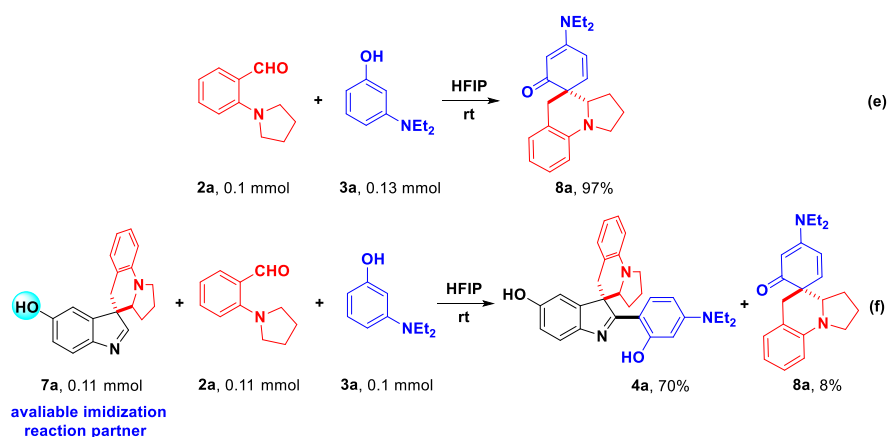

### Control experiment (e)

A reaction tube was charged with *o*-amino benzaldehyde **2a** (0.1 mmol), 3-aminophenol **3a** (0.13 mmol), and HFIP (1.0 mL). The mixture was stirred at room temperature under an air atmosphere. Upon completion of the reaction as indicated by TLC analysis, the mixture was concentrated in vacuum and the residue was directly purified by flash column chromatography on silica gel (eluent: ethyl acetate/petroleum ether, 1:8) to afford the product **8a** in 97% yield. And the structure of **8a** was determined by the literature<sup>3</sup>.

### Control experiment (f)

A reaction tube was charged with intermediate **7a** (0.11 mmol), *o*-amino benzaldehyde **2a** (0.11 mmol), 3-aminophenol **3a** (0.1 mmol), and HFIP (1.0 mL). The mixture was stirred at room temperature under an air atmosphere. Upon completion of the reaction as indicated by TLC analysis, the mixture was concentrated in vacuum and the residue was directly purified by flash column chromatography on silica gel (eluent: ethyl acetate/petroleum ether, 1:25) to afford the product **4a** in 70% yield and **8a** (eluent: ethyl acetate/petroleum ether, 1:8) in 8% yield.

## 3. Characterization of Products

2-(4-(diethylamino)-2-hydroxyphenyl)-1',2',3',3a'-tetrahydro-5'H-spiro[indole-3,4'-pyrrolo[1,2-a]quinolin]-5-ol (**4a**)

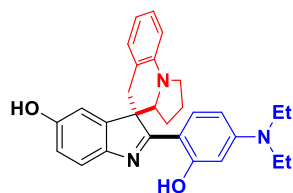

Flash column chromatography on a silica gel (ethyl acetate: petroleum ether, 1:25) afforded the product (33.6 mg, 71% yield) as a yellow solid.

**<sup>1</sup>H NMR** (500 MHz, CDCl<sub>3</sub>) δ 7.37 (d, *J* = 9.1 Hz, 1H), 7.25 (d, *J* = 8.3 Hz, 1H), 7.19 – 7.14 (m, 2H), 6.96 (d, *J* = 7.3 Hz, 1H), 6.68 (d, *J* = 8.2 Hz, 1H), 6.60 (t, *J* = 7.3 Hz, 1H), 6.55 (d, *J* = 8.1 Hz, 1H), 6.24 (s, 1H), 6.12 (d, *J* = 8.9 Hz, 1H), 6.08 (s, 1H), 4.25 (dd, *J* = 9.3, 5.9 Hz, 1H), 3.81 (d, *J* = 16.6 Hz, 1H), 3.41 (dd, *J* = 8.6, 6.4 Hz, 1H), 3.31 (q, *J* = 6.9 Hz, 4H), 3.25 (dd, *J* = 16.6, 8.3 Hz, 1H), 2.66 (d, *J* = 16.6 Hz, 1H), 1.75 (dd, *J* = 19.5, 8.2 Hz, 2H), 1.59 – 1.51 (m, 2H), 1.13 (t, *J* = 7.0 Hz, 6H), 0.70 – 0.61 (m, 1H); **<sup>13</sup>C NMR** (125 MHz, CDCl<sub>3</sub>) δ 178.0, 164.5, 153.4, 150.9, 144.1, 140.1, 129.8, 129.3, 127.9, 118.5, 118.1, 116.0, 114.7, 111.9, 110.6, 105.2, 103.1, 98.9, 61.7, 57.6, 47.3, 44.4, 44.4, 36.5, 29.7, 26.9, 23.1, 12.8, 12.8. **HRMS (ESI)**: calcd. for C<sub>29</sub>H<sub>32</sub>N<sub>3</sub>O<sub>2</sub> [M+H]<sup>+</sup>: 454.2489, found: 454.2490.

**2-(4-(diethylamino)-2-hydroxyphenyl)-6'-fluoro-1',2',3',3a'-tetrahydro-5'H-spiro[indole-3,4'-pyrrolo[1,2-a]quinolin]-5-ol (4b)**

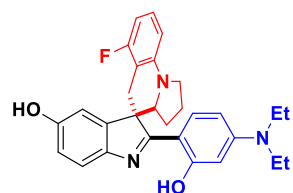

Flash column chromatography on a silica gel (ethyl acetate: petroleum ether, 1:25) afforded the product (36.3 mg, 74% yield) as a yellow solid.

**<sup>1</sup>H NMR** (500 MHz, CDCl<sub>3</sub>) δ 7.34 (d, *J* = 9.0 Hz, 1H), 7.23 – 7.15 (m, 2H), 7.04 (dd, *J* = 14.3, 7.1 Hz, 1H), 6.70 (d, *J* = 7.8 Hz, 1H), 6.31 (dd, *J* = 16.9, 8.3 Hz, 2H), 6.21 (s, 1H), 6.13 (d, *J* = 9.9 Hz, 2H), 4.25 – 4.16 (m, 1H), 3.52 (d, *J* = 17.2 Hz, 1H), 3.39 (t, *J* = 8.1 Hz, 1H), 3.29 (d, *J* = 6.8 Hz, 4H), 3.22 (dd, *J* = 16.4, 8.1 Hz, 1H), 2.85 (d, *J* = 17.1 Hz, 1H), 1.71 (dd, *J* = 18.3, 8.8 Hz, 2H), 1.58 – 1.51 (m, 2H), 1.18 (s, 1H), 1.10 (t, *J* = 6.6 Hz, 6H), 0.71 – 0.63 (m, 1H); **<sup>13</sup>C NMR** (125 MHz, CDCl<sub>3</sub>) δ 177.7, 164.6, 162.0 (d, *J* = 237.5 Hz), 153.5, 151.0, 145.5, 145.4 (d, *J* = 3.75 Hz), 140.0, 129.2, 128.4 (d, *J* = 11.2 Hz), 118.5, 114.9, 111.7, 106.3, 105.4 (d, *J* = 20 Hz), 105.0, 103.3, 102.7 (d, *J* = 22.5 Hz), 98.9, 61.3, 56.7, 47.7, 44.4, 44.4, 29.6, 26.9, 23.0, 12.8, 12.8. **HRMS (ESI)**: calcd. for C<sub>29</sub>H<sub>31</sub>FN<sub>3</sub>O<sub>2</sub> [M+H]<sup>+</sup>: 472.2395, found: 472.2407.

**6'-chloro-2-(4-(diethylamino)-2-hydroxyphenyl)-1',2',3',3a'-tetrahydro-5'H-spiro[indole-3,4'-pyrrolo[1,2-a]quinolin]-5-ol (4c)**

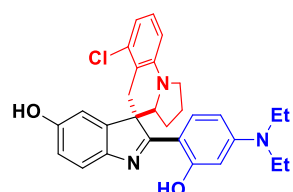

Flash column chromatography on a silica gel (ethyl acetate: petroleum ether, 1:25) afforded the product (28.9 mg, 57% yield) as a yellow solid.

**<sup>1</sup>H NMR** (500 MHz, CDCl<sub>3</sub>) δ 7.36 (d, *J* = 9.0 Hz, 1H), 7.27 (d, *J* = 8.2 Hz, 1H), 7.19 (s, 1H), 7.07 (t, *J* = 8.0 Hz, 1H), 6.72 – 6.67 (m, 2H), 6.47 (d, *J* = 8.2 Hz, 1H), 6.25 (s, 1H), 6.15 (d, *J* = 9.3 Hz, 2H), 4.25 – 4.17 (m, 1H), 3.57 (d, *J* = 17.6 Hz, 1H), 3.40 (t, *J* = 8.6 Hz, 1H), 3.32 (dd, *J* = 13.9, 7.0 Hz, 4H), 3.29 – 3.24 (m, 1H), 2.93 (d, *J* = 17.6 Hz, 1H), 1.74 (dd, *J* = 17.4, 8.3 Hz, 2H), 1.66 (m, 2H), 1.13 (t, *J* = 6.8 Hz, 6H), 0.67 (dd, *J* = 20.4, 10.1 Hz, 1H); **<sup>13</sup>C NMR** (125 MHz, CDCl<sub>3</sub>) δ 177.8, 164.4, 153.2, 150.9, 146.1, 145.3, 135.3, 129.2, 128.3, 118.7, 116.9, 116.3, 114.8, 114.2, 111.6, 109.1, 104.9, 103.1, 98.9, 61.2, 57.5, 47.6, 44.4, 44.4, 34.4, 26.9, 23.1, 12.8, 12.8. **HRMS (ESI)**: calcd. for C<sub>29</sub>H<sub>31</sub>ClN<sub>3</sub>O<sub>2</sub> [M+H]<sup>+</sup>: 488.2099, found: 488.2085.

**6'-bromo-2-(4-(diethylamino)-2-hydroxyphenyl)-1',2',3',3a'-tetrahydro-5'H-spiro[indole-3,4'-pyrrolo[1,2-a]quinolin]-5-ol (4d)**

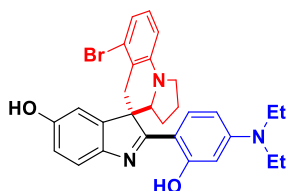

Flash column chromatography on a silica gel (ethyl acetate: petroleum ether, 1:25) afforded the product (36.4 mg, 66% yield) as a yellow solid.

**<sup>1</sup>H NMR** (500 MHz, CDCl<sub>3</sub>) δ 7.36 (d, *J* = 9.1 Hz, 1H), 7.27 (d, *J* = 8.3 Hz, 1H), 7.19 (s, 2H), 7.01 (t, *J* = 8.0 Hz, 1H), 6.88 (d, *J* = 7.9 Hz, 1H), 6.70 (d, *J* = 8.1 Hz, 1H), 6.51 (d, *J* = 8.2 Hz, 1H), 6.25 (d, *J* = 1.9 Hz, 1H), 6.15 (d, *J* = 14.1 Hz, 2H), 4.20 (dd, *J* = 9.2, 6.0 Hz, 1H), 3.56 (d, *J* = 17.5 Hz, 1H), 3.40 (td, *J* = 8.8, 3.0 Hz, 1H), 3.33 (q, *J* = 7.1 Hz, 4H), 3.30 – 3.25 (m, 1H), 2.90 (d, *J* = 17.5 Hz, 1H), 1.81 – 1.68 (m, 2H), 1.53 (m, 2H), 1.14 (t, *J* = 7.0 Hz, 6H), 0.72 – 0.64 (m, 1H); **<sup>13</sup>C NMR** (125 MHz, CDCl<sub>3</sub>) δ 177.7, 164.4, 153.1, 150.9, 145.4, 140.4, 129.2, 129.0, 128.7, 126.2, 120.1, 118.7, 117.8, 114.8, 111.5, 109.8, 104.9, 103.2, 98.9, 61.2, 57.9, 47.6, 44.4, 44.4, 37.3, 26.8, 23.1, 12.8, 12.8. **HRMS (ESI)**: calcd. for C<sub>29</sub>H<sub>31</sub>BrN<sub>3</sub>O<sub>2</sub> [M+H]<sup>+</sup>: 532.1594, found: 532.1585.

**(2-hydroxy-4-(pyrrolidin-1-yl)phenyl)-1',2',3',3a'-tetrahydro-5'H-spiro[indole-3,4'-pyrrolo[1,2-a]quinolin]-5-ol (4e)**

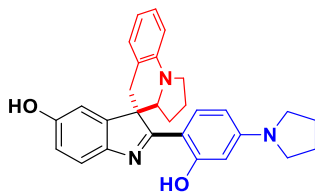

Flash column chromatography on a silica gel (ethyl acetate: petroleum ether, 1:25) afforded the product (28.3 mg, 60% yield) as a yellow solid.

**<sup>1</sup>H NMR** (500 MHz, CDCl<sub>3</sub>) δ 7.39 (d, *J* = 8.9 Hz, 1H), 7.25 (d, *J* = 8.3 Hz, 1H), 7.16 (m, 2H), 6.96 (d, *J* = 7.4 Hz, 1H), 6.70 – 6.66 (m, 1H), 6.60 (t, *J* = 7.3 Hz, 1H), 6.55 (d, *J* = 8.1 Hz, 1H), 6.14 (s, 1H), 6.08 (s, 1H), 6.04 (d, *J* = 8.9 Hz, 1H), 4.25 (m, 1H), 3.82 (d, *J* = 16.6 Hz, 1H), 3.45 – 3.37 (m, 1H), 3.27 (d, *J* = 11.5 Hz, 5H), 2.67 (d, *J* = 16.6 Hz, 1H), 1.95 (d, *J* = 15.9 Hz, 4H), 1.72 (m, 2H), 1.52 (m, 2H), 0.65 (m, 1H); **<sup>13</sup>C NMR** (125 MHz, CDCl<sub>3</sub>) δ 178.3, 164.3, 153.2, 150.6, 145.8, 144.1, 140.2, 129.8, 129.2, 128.0, 118.6, 118.1, 116.0, 114.7, 111.8, 110.6, 105.4, 103.6, 99.4, 61.7, 57.6, 47.5, 47.5, 47.3, 36.4, 26.9, 25.5, 25.5, 23.1. **HRMS (ESI)**: calcd. for C<sub>29</sub>H<sub>30</sub>N<sub>3</sub>O<sub>2</sub> [M+H]<sup>+</sup>: 452.2333, found: 452.2325.

**2-(4-amino-2-hydroxyphenyl)-1',2',3',3a'-tetrahydro-5'H-spiro[indole-3,4'-pyrrolo[1,2-a]quinolin]-5-ol (4f)**

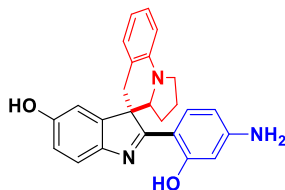

Flash column chromatography on a silica gel (ethyl acetate: petroleum ether, 1:25) afforded the product (27.5 mg, 66% yield) as a yellow solid.

**<sup>1</sup>H NMR** (500 MHz, CDCl<sub>3</sub>) δ 7.33 (d, *J* = 8.7 Hz, 1H), 7.27 (d, *J* = 8.3 Hz, 1H), 7.19 (m, 2H), 6.96 (d, *J* = 7.3 Hz, 1H), 6.69 (d, *J* = 8.3 Hz, 1H), 6.60 (t, *J* = 7.3 Hz, 1H), 6.55 (d, *J* = 8.1 Hz, 1H), 6.27 (s, 1H), 6.10 (d, *J* = 7.7 Hz, 2H), 4.23 (m, 1H), 4.08 – 3.96 (m, 2H), 3.84 – 3.78 (m, 1H), 3.41 (m, 1H), 3.25 (m, 1H), 2.65 (d, *J* = 16.6 Hz, 1H), 1.76 (m, 2H), 1.52 (m, 2H), 1.20 (d, *J* = 22.0 Hz, 2H), 0.72 – 0.59 (m, 1H); **<sup>13</sup>C NMR** (125 MHz, CDCl<sub>3</sub>) δ 178.3, 164.5, 153.6, 150.5, 145.3, 144.0, 140.3, 129.8, 129.5, 128.0, 119.0, 117.9, 116.1, 114.8, 111.8, 110.6, 107.7, 106.2, 102.6, 61.6, 57.8, 47.3, 36.3, 26.9, 23.0. **HRMS (ESI)**: calcd. for C<sub>25</sub>H<sub>24</sub>N<sub>3</sub>O<sub>2</sub> [M+H]<sup>+</sup>: 398.1863, found: 398.1857.

**2-(6-hydroxybenzo[d][1,3]dioxol-5-yl)-1',2',3',3a'-tetrahydro-5'H-spiro[indole-3,4'-pyrrolo[1,2-a]quinolin]-5-ol (4g)**

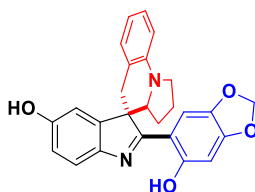

Flash column chromatography on a silica gel (ethyl acetate: petroleum ether, 1:25) afforded the product (27.7mg, 62% yield) as a yellow solid.

**<sup>1</sup>H NMR** (500 MHz, DMSO) δ 15.27 (s, 1H), 9.40 (s, 1H), 7.38 (d, *J* = 8.3 Hz, 1H), 7.31 (s, 1H), 7.21 (t, *J* = 7.7 Hz, 1H), 7.02 (d, *J* = 7.3 Hz, 1H), 6.72 (dd, *J* = 8.3, 1.9 Hz, 1H), 6.68 (d, *J* = 6.7 Hz, 2H), 6.63 (t, *J* = 7.3 Hz, 1H), 6.07 (d, *J* = 1.9 Hz, 1H), 6.04 (d, *J* = 5.1 Hz, 2H), 4.42 (dd, *J* = 9.5, 5.9 Hz, 1H), 3.84 (d, *J* = 16.3 Hz, 1H), 3.50 (dd, *J* = 9.0, 7.1 Hz, 1H), 3.23 (q, *J* = 8.4 Hz, 1H), 2.60 (d, *J* = 16.4 Hz, 1H), 1.89 – 1.80 (m, 1H), 1.75 (dd, *J* = 12.3, 5.3 Hz, 1H), 1.47 (dt, *J* = 12.0, 5.9 Hz, 1H), 0.56 (dd, *J* = 19.5, 10.2 Hz, 1H); **<sup>13</sup>C NMR** (125 MHz, DMSO) δ 178.0, 160.2, 156.1, 151.1, 144.3, 143.4, 140.6, 129.7, 128.2, 119.4, 118.1, 116.0, 115.1, 112.3, 111.1, 107.6, 106.3, 102.1, 99.4, 60.6, 58.1, 47.4, 35.9, 26.9, 26.8, 22.9. **HRMS (ESI)**: calcd. for C<sub>26</sub>H<sub>23</sub>N<sub>2</sub>O<sub>4</sub> [M+H]<sup>+</sup>: 427.1652, found: 427.1645.

**2-(1H-indol-3-yl)-1',2',3',3a'-tetrahydro-5'H-spiro[indole-3,4'-pyrrolo[1,2-a]quinolin]-5-ol (4h)**

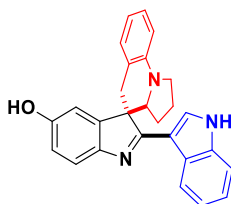

Flash column chromatography on a silica gel (ethyl acetate: petroleum ether, 1:15) afforded the product (26.8 mg, 68% yield) as a yellow solid.



**<sup>1</sup>H NMR** (500 MHz, DMSO)  $\delta$  11.78 (s, 1H), 9.07 (s, 1H), 8.74 (d,  $J = 7.6$  Hz, 1H), 8.19 (s, 1H), 7.46 (d,  $J = 7.7$  Hz, 1H), 7.37 (d,  $J = 8.2$  Hz, 1H), 7.26 – 7.17 (m, 3H), 7.01 (d,  $J = 7.3$  Hz, 1H), 6.67 (dd,  $J = 15.5, 8.2$  Hz, 2H), 6.60 (t,  $J = 7.3$  Hz, 1H), 6.02 (s, 1H), 4.35 (dd,  $J = 9.3, 6.0$  Hz, 1H), 3.77 (d,  $J = 15.9$  Hz, 1H), 3.52 (t,  $J = 8.5$  Hz, 1H), 3.22 (dd,  $J = 16.9, 8.5$  Hz, 1H), 2.55 (s, 1H), 1.79 (dd,  $J = 21.0, 9.2$  Hz, 2H), 1.42 (m, 1H), 0.66 – 0.46 (m, 1H); **<sup>13</sup>C NMR** (125 MHz, DMSO)  $\delta$  174.9, 154.6, 149.1, 144.6, 141.4, 136.8, 129.6, 129.2, 128.1, 126.9, 123.9, 123.0, 121.1, 119.8, 119.2, 115.6, 114.5, 111.9, 111.8, 110.7, 109.5, 62.7, 57.1, 47.7, 38.2, 27.0, 23.2. **HRMS (ESI)**: calcd. for C<sub>27</sub>H<sub>24</sub>N<sub>3</sub>O [M+H]<sup>+</sup>: 406.1914, found: 406.1906.

**2-(5-methoxy-1H-indol-3-yl)-1',2',3',3a'-tetrahydro-5'H-spiro[indole-3,4'-pyrrolo[1,2-a]quinolin]-5-ol (4i)**

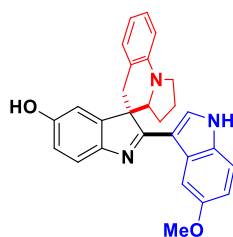

Flash column chromatography on a silica gel (ethyl acetate: petroleum ether, 1:15) afforded the product (28.2 mg, 62% yield) as a yellow solid.

**<sup>1</sup>H NMR** (500 MHz, DMSO)  $\delta$  11.63 (d,  $J = 2.0$  Hz, 1H), 9.09 (s, 1H), 8.31 (d,  $J = 2.5$  Hz, 1H), 8.11 (d,  $J = 2.9$  Hz, 1H), 7.37 (d,  $J = 8.4$  Hz, 2H), 7.19 (s, 1H), 7.01 (d,  $J = 7.3$  Hz, 1H), 6.89 (dd,  $J = 8.7, 2.6$  Hz, 1H), 6.68 (dd,  $J = 8.2, 2.4$  Hz, 1H), 6.64 (d,  $J = 8.1$  Hz, 1H), 6.60 (t,  $J = 7.3$  Hz, 1H), 6.01 (d,  $J = 2.4$  Hz, 1H), 4.32 (dd,  $J = 9.6, 5.9$  Hz, 1H), 3.85 (s, 3H), 3.74 (d,  $J = 15.9$  Hz, 1H), 3.21 (d,  $J = 8.1$  Hz, 1H), 2.51 (dd,  $J = 3.6, 1.9$  Hz, 2H), 1.84 – 1.70 (m, 2H), 1.41 (m, 1H), 0.63 – 0.53 (m, 1H); **<sup>13</sup>C NMR** (125 MHz, DMSO)  $\delta$  175.0, 155.2, 154.5, 149.0, 144.5, 141.3, 131.9, 129.6, 129.5, 128.1, 127.5, 119.8, 119.1, 115.6, 114.5, 112.7, 112.6, 111.9, 110.7, 109.3, 106.1, 62.7, 57.1, 55.9, 47.7, 38.2, 27.0, 23.2. **HRMS (ESI)**: calcd. for C<sub>28</sub>H<sub>26</sub>N<sub>3</sub>O<sub>2</sub> [M+H]<sup>+</sup>: 436.2020, found: 436.2014.

**2-(5-fluoro-1H-indol-3-yl)-1',2',3',3a'-tetrahydro-5'H-spiro[indole-3,4'-pyrrolo[1,2-a]quinolin]-5-ol (4j)**

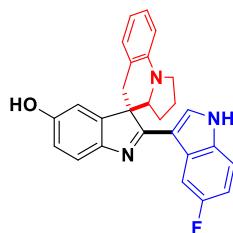

Flash column chromatography on a silica gel (ethyl acetate: petroleum ether, 1:15) afforded the product (26.6 mg, 60% yield) as a yellow solid.

**<sup>1</sup>H NMR** (500 MHz, DMSO)  $\delta$  11.87 (s, 1H), 9.16 (s, 1H), 8.47 – 8.42 (m, 1H), 8.23 (d,  $J = 2.8$  Hz, 1H), 7.48 (dd,  $J = 8.8, 4.7$  Hz, 1H), 7.39 (d,  $J = 8.2$  Hz, 1H), 7.19 (t,  $J = 7.7$  Hz, 1H), 7.12 – 7.07 (m, 1H), 7.00 (d,  $J = 7.3$  Hz, 1H), 6.69 (dd,  $J = 8.2, 2.4$  Hz, 1H), 6.64 (d,  $J = 8.1$  Hz, 1H), 6.59 (t,  $J = 7.3$  Hz, 1H), 6.00 (d,  $J = 2.3$  Hz, 1H), 4.32 (dd,  $J = 9.6, 5.9$  Hz, 1H), 3.72 (s, 1H), 3.50 (d,  $J = 7.0$  Hz, 1H), 3.20 (q,  $J = 8.7$  Hz, 1H), 2.54 (s, 1H), 1.82 – 1.70 (m, 2H), 1.40 (m, 1H), 0.55 (dd,  $J = 19.2, 10.2$  Hz, 1H); **<sup>13</sup>C NMR** (125 MHz, DMSO)  $\delta$  174.7, 158.5 (d,  $J = 230.0$  Hz), 154.7, 148.9, 144.5, 141.3, 133.5, 130.8,

129.6, 128.2, 127.2 (d,  $J=11.3$  Hz), 119.9, 119.0, 115.7, 114.5, 113.1 (d,  $J=10.0$  Hz), 111.9, 111.2 (d,  $J=26.3$  Hz), 110.7, 109.6 (d,  $J=3.8$  Hz), 108.4 (d,  $J=23.8$  Hz), 62.6, 57.1, 47.7, 38.0, 26.9, 23.2. **HRMS (ESI)** : calcd. for  $C_{27}H_{23}FN_3O$   $[M+H]^+$ : 424.1820, found: 424.1807.

**2-(5-chloro-1H-indol-3-yl)-1',2',3',3a'-tetrahydro-5'H-spiro[indole-3,4'-pyrrolo[1,2-a]quinolin]-5-ol (4k)**

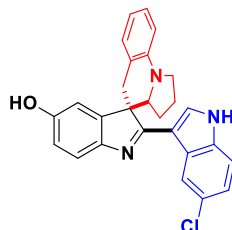

Flash column chromatography on a silica gel (ethyl acetate: petroleum ether, 1:15) afforded the product (25.3 mg, 55% yield) as a yellow solid.

**$^1H$  NMR** (500 MHz, DMSO)  $\delta$  11.98 (s, 1H), 9.10 (s, 1H), 8.75 (s, 1H), 8.28 (s, 1H), 7.48 (d,  $J = 8.6$  Hz, 1H), 7.41 (d,  $J = 8.2$  Hz, 1H), 7.25 (dd,  $J = 8.6, 2.2$  Hz, 1H), 7.20 (t,  $J = 7.7$  Hz, 1H), 7.01 (d,  $J = 7.2$  Hz, 1H), 6.69 (dd,  $J = 8.3, 2.3$  Hz, 1H), 6.65 (d,  $J = 8.1$  Hz, 1H), 6.60 (t,  $J = 7.3$  Hz, 1H), 6.02 (s, 1H), 4.33 (dd,  $J = 9.6, 5.9$  Hz, 1H), 3.76 (d,  $J = 15.9$  Hz, 1H), 3.52 (t,  $J = 7.8$  Hz, 1H), 3.25 – 3.19 (m, 1H), 2.55 (s, 1H), 1.83 – 1.74 (m, 2H), 1.44 – 1.37 (m, 1H), 0.62 – 0.53 (m, 1H);  **$^{13}C$  NMR** (125 MHz, DMSO)  $\delta$  174.5, 154.8, 148.8, 144.5, 141.3, 135.4, 130.6, 129.6, 128.2, 127.9, 125.8, 122.9, 122.8, 120.0, 119.1, 115.6, 114.5, 113.6, 111.9, 110.7, 109.2, 62.6, 57.2, 47.7, 37.9, 26.9, 23.2. **HRMS (ESI)**: calcd. for  $C_{27}H_{23}ClN_3O$   $[M+H]^+$ : 440.1524, found: 440.1503.

**2-(5-hydroxy-1H-indol-3-yl)-1',2',3',3a'-tetrahydro-5'H-spiro[indole-3,4'-pyrrolo[1,2-a]quinolin]-5-ol (4l)**

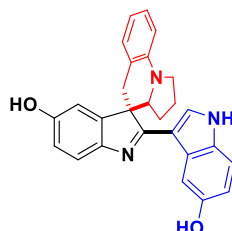

Flash column chromatography on a silica gel (ethyl acetate: petroleum ether, 1:15) afforded the product (37.5 mg, 85% yield) as a yellow solid.

**$^1H$  NMR** (500 MHz, DMSO)  $\delta$  11.54 (s, 1H), 9.06 (s, 1H), 8.93 (s, 1H), 8.17 (s, 1H), 8.08 (s, 1H), 7.35 (d,  $J = 8.2$  Hz, 1H), 7.27 (d,  $J = 8.6$  Hz, 1H), 7.19 (t,  $J = 7.5$  Hz, 1H), 7.02 (d,  $J = 7.1$  Hz, 1H), 6.79 – 6.73 (m, 1H), 6.72 – 6.68 (m, 1H), 6.64 (d,  $J = 8.1$  Hz, 1H), 6.60 (t,  $J = 7.3$  Hz, 1H), 6.04 (s, 1H), 4.32 (dd,  $J = 9.1, 6.1$  Hz, 1H), 3.76 (d,  $J = 16.0$  Hz, 1H), 3.51 (t,  $J = 8.0$  Hz, 1H), 3.22 (d,  $J = 8.3$  Hz, 1H), 2.52 (d,  $J = 5.7$  Hz, 1H), 1.78 (dd,  $J = 21.1, 9.2$  Hz, 2H), 1.48 – 1.37 (m, 1H), 0.65 – 0.53 (m, 1H);  **$^{13}C$  NMR** (125 MHz, DMSO)  $\delta$  174.9, 154.6, 149.1, 144.6, 141.4, 136.8, 129.6, 129.2, 128.1, 126.9, 123.9, 122.9, 121.1, 119.8, 119.2, 115.6, 114.5, 112.0, 111.9, 110.7, 109.5, 62.7, 57.1, 47.7, 38.2, 26.9, 23.2. **HRMS (ESI)**: calcd. for  $C_{27}H_{24}N_3O_2$   $[M+H]^+$ : 422.1863, found: 422.1853.

**2-(2-methoxy-1H-indol-3-yl)-1',2',3',3a'-tetrahydro-5'H-spiro[indole-3,4'-pyrrolo[1,2-a]quinolin]-5-ol (4m)**

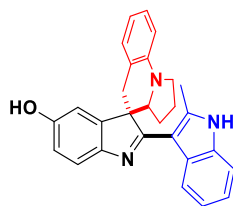

Flash column chromatography on a silica gel (ethyl acetate: petroleum ether, 1:15) afforded the product (22.4 mg, 51% yield, dr 4:1) as a yellow solid.

**<sup>1</sup>H NMR** (500 MHz, DMSO)  $\delta$  10.77 (d,  $J = 21.5$  Hz, 1H), 8.62 (s, 1H), 7.47 (d,  $J = 7.6$  Hz, 1H), 7.24 (dd,  $J = 7.5, 0.8$  Hz, 1H), 7.22 (d,  $J = 2.7$  Hz, 1H), 7.20 (d,  $J = 8.9$  Hz, 1H), 7.17 (t,  $J = 7.9$  Hz, 1H), 6.95 (d,  $J = 7.2$  Hz, 1H), 6.91 (d,  $J = 7.2$  Hz, 1H), 6.88 (d,  $J = 2.2$  Hz, 1H), 6.63 (dd,  $J = 8.6, 2.3$  Hz, 1H), 6.60 – 6.56 (m, 2H), 6.41 (d,  $J = 7.4$  Hz, 1H), 6.27 – 6.21 (m, 1H), 4.04 – 3.96 (m, 1H), 3.10 (dd,  $J = 16.5, 9.1$  Hz, 1H), 2.53 – 2.49 (m, 1H), 2.28 (s, 3H), 1.82 (m, 1H), 1.73 – 1.67 (m, 1H), 1.61 (m, 1H), 0.45 – 0.36 (m, 1H); **<sup>13</sup>C NMR** (125 MHz, DMSO)  $\delta$  184.9, 155.5, 151.0, 144.3, 139.6, 130.9, 129.6, 128.9, 128.9, 128.1, 125.9, 125.1, 123.7, 119.8, 118.3, 115.8, 112.1, 111.7, 110.5, 104.3, 100.7, 61.0, 56.2, 47.6, 35.7, 26.7, 23.3, 16.4. **HRMS (ESI)**: calcd. for C<sub>28</sub>H<sub>26</sub>N<sub>3</sub>O [M+H]<sup>+</sup>: 420.2070, found: 420.2099.

**6'-fluoro-2-(5-hydroxy-1H-indol-3-yl)-1',2',3',3a'-tetrahydro-5'H-spiro[indole-3,4'-pyrrolo[1,2-a]quinolin]-5-ol (4n)**

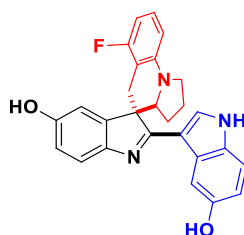

Flash column chromatography on a silica gel (ethyl acetate: petroleum ether, 1:4) afforded the product (35.7 mg, 78% yield) as a yellow solid.

**<sup>1</sup>H NMR** (500 MHz, DMSO)  $\delta$  11.54 (d,  $J = 2.4$  Hz, 1H), 9.14 (s, 1H), 8.96 (s, 1H), 8.11 (dd,  $J = 13.4, 2.7$  Hz, 2H), 7.35 (d,  $J = 8.2$  Hz, 1H), 7.26 (d,  $J = 8.6$  Hz, 1H), 7.21 (dd,  $J = 15.2, 8.0$  Hz, 1H), 6.72 (m, 2H), 6.50 (d,  $J = 8.2$  Hz, 1H), 6.44 (t,  $J = 8.7$  Hz, 1H), 6.03 (d,  $J = 2.4$  Hz, 1H), 4.29 (dd,  $J = 9.6, 6.0$  Hz, 1H), 3.58 – 3.53 (m, 2H), 3.21 (dd,  $J = 16.8, 8.9$  Hz, 1H), 2.61 (d,  $J = 15.7$  Hz, 1H), 1.83 – 1.69 (m, 2H), 1.43 (dt,  $J = 12.0, 5.8$  Hz, 1H), 0.62 – 0.52 (m, 1H); **<sup>13</sup>C NMR** (125 MHz, DMSO)  $\delta$  174.7, 161.5 (d,  $J = 237.5$  Hz), 154.6, 152.7, 149.1, 146.1 (d,  $J = 7.5$  Hz), 141.1, 131.2, 129.4, 128.9 (d,  $J = 11.3$  Hz), 127.7, 119.6, 114.7, 113.1, 112.3, 111.5, 108.7, 108.1, 106.9, 106.0 (d,  $J = 20.0$  Hz), 102.1 (d,  $J = 22.5$  Hz), 62.2, 56.1, 48.1, 31.1, 26.9, 23.1. **HRMS (ESI)**: calcd. for C<sub>27</sub>H<sub>23</sub>FN<sub>3</sub>O<sub>2</sub> [M+H]<sup>+</sup>: 440.1769, found: 440.1753.

**6'-chloro-2-(5-hydroxy-1H-indol-3-yl)-1',2',3',3a'-tetrahydro-5'H-spiro[indole-3,4'-pyrrolo[1,2-a]quinolin]-5-ol (4o)**

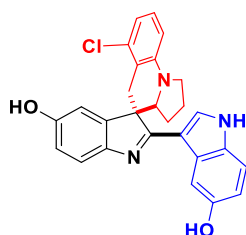

Flash column chromatography on a silica gel (ethyl acetate: petroleum ether, 1:4) afforded the product (32.4 mg, 68% yield) as a yellow solid.

**<sup>1</sup>H NMR** (500 MHz, DMSO)  $\delta$  11.52 (d,  $J$  = 2.1 Hz, 1H), 9.20 (s, 1H), 9.02 (s, 1H), 8.11 (d,  $J$  = 2.4 Hz, 1H), 8.07 (d,  $J$  = 2.9 Hz, 1H), 7.36 (d,  $J$  = 8.3 Hz, 1H), 7.28 (d,  $J$  = 8.6 Hz, 1H), 7.20 (t,  $J$  = 8.1 Hz, 1H), 6.74 (dd,  $J$  = 8.6, 2.5 Hz, 1H), 6.72 (d,  $J$  = 2.8 Hz, 1H), 6.70 (d,  $J$  = 2.7 Hz, 1H), 6.63 (d,  $J$  = 8.2 Hz, 1H), 6.04 (d,  $J$  = 2.4 Hz, 1H), 4.29 (dd,  $J$  = 9.5, 6.0 Hz, 1H), 3.50 (dd,  $J$  = 16.1, 12.3 Hz, 2H), 3.22 (dd,  $J$  = 17.0, 8.7 Hz, 1H), 2.68 (d,  $J$  = 16.7 Hz, 1H), 1.83 – 1.70 (m, 2H), 1.44 (dt,  $J$  = 11.5, 5.8 Hz, 1H), 0.59 (dd,  $J$  = 19.2, 10.3 Hz, 1H); **<sup>13</sup>C NMR** (125 MHz, DMSO)  $\delta$  174.6, 154.5, 152.7, 149.1, 146.0, 141.2, 134.1, 131.2, 129.4, 129.0, 127.6, 119.7, 116.6, 115.9, 114.8, 113.2, 112.4, 111.5, 109.8, 108.7, 108.1, 62.1, 56.8, 48.0, 36.3, 27.0, 23.2. **HRMS (ESI)**: calcd. for C<sub>27</sub>H<sub>23</sub>ClN<sub>3</sub>O<sub>2</sub> [M+H]<sup>+</sup>: 456.1473, found: 456.1455.

**6'-bromo-2-(5-hydroxy-1H-indol-3-yl)-1',2',3',3a'-tetrahydro-5'H-spiro[indole-3,4'-pyrrolo[1,2-a]quinolin]-5-ol (4p)**

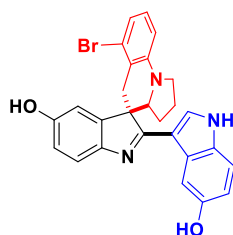

Flash column chromatography on a silica gel (ethyl acetate: petroleum ether, 1:4) afforded the product (36.5 mg, 70% yield) as a yellow solid.

**<sup>1</sup>H NMR** (500 MHz, DMSO)  $\delta$  11.56 (d,  $J$  = 2.3 Hz, 1H), 9.13 (s, 1H), 8.93 (s, 1H), 8.13 (s, 2H), 7.35 (d,  $J$  = 8.2 Hz, 1H), 7.26 (d,  $J$  = 8.6 Hz, 1H), 7.14 (t,  $J$  = 8.1 Hz, 1H), 6.88 (d,  $J$  = 7.7 Hz, 1H), 6.75 – 6.67 (m, 3H), 6.06 (d,  $J$  = 2.3 Hz, 1H), 4.33 (dd,  $J$  = 9.5, 6.0 Hz, 1H), 3.56 – 3.49 (m, 2H), 3.24 (dd,  $J$  = 17.1, 8.7 Hz, 1H), 2.66 (d,  $J$  = 16.6 Hz, 1H), 1.87 – 1.73 (m, 2H), 1.45 (m, 1H), 0.65 – 0.53 (m, 1H); **<sup>13</sup>C NMR** (125 MHz, DMSO)  $\delta$  174.5, 154.6, 152.8, 149.1, 146.1, 141.2, 131.2, 129.5, 129.4, 127.7, 125.4, 119.7, 119.1, 118.3, 114.8, 113.1, 112.3, 111.5, 110.3, 108.7, 108.1, 62.1, 57.0, 48.0, 39.3, 26.9, 23.3. **HRMS (ESI)**: calcd. for C<sub>27</sub>H<sub>23</sub>BrN<sub>3</sub>O<sub>2</sub> [M+H]<sup>+</sup>: 500.0968, found: 500.0954.

**5'-methyl-2-(5-hydroxy-1H-indol-3-yl)-1',2',3',3a'-tetrahydro-5'H-spiro[indole-3,4'-pyrrolo[1,2-a]quinolin]-5-ol (4q)**

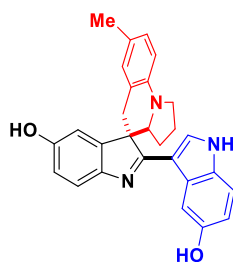

Flash column chromatography on a silica gel (ethyl acetate: petroleum ether, 1:4) afforded the product (31.9 mg, 70% yield) as a yellow solid.

**<sup>1</sup>H NMR** (500 MHz, DMSO)  $\delta$  11.51 (s, 1H), 9.05 (s, 1H), 8.92 (s, 1H), 8.15 (d,  $J = 2.4$  Hz, 1H), 8.03 (d,  $J = 2.0$  Hz, 1H), 7.36 – 7.30 (m, 1H), 7.26 (d,  $J = 8.6$  Hz, 1H), 7.00 (d,  $J = 8.2$  Hz, 1H), 6.84 (s, 1H), 6.73 (dd,  $J = 8.6, 2.4$  Hz, 1H), 6.69 (dd,  $J = 8.2, 2.4$  Hz, 1H), 6.55 (d,  $J = 8.2$  Hz, 1H), 6.04 (d,  $J = 2.4$  Hz, 1H), 4.27 (dd,  $J = 9.5, 6.0$  Hz, 1H), 3.71 (d,  $J = 16.1$  Hz, 1H), 3.50 – 3.44 (m, 1H), 3.20 (q,  $J = 8.5$  Hz, 1H), 2.53 – 2.50 (m, 1H), 2.20 (s, 3H), 1.84 – 1.67 (m, 2H), 1.40 (m, 1H), 0.59 (dd,  $J = 19.2, 10.3$  Hz, 1H); **<sup>13</sup>C NMR** (125 MHz, DMSO)  $\delta$  175.1, 154.4, 152.7, 149.2, 142.5, 141.4, 131.1, 130.2, 129.2, 128.5, 127.8, 123.8, 119.4, 119.2, 114.4, 113.0, 112.3, 112.0, 110.8, 109.0, 108.2, 62.8, 57.3, 47.7, 38.2, 27.0, 23.2, 20.6. **HRMS (ESI)**: calcd. for C<sub>28</sub>H<sub>26</sub>N<sub>3</sub>O<sub>2</sub> [M+H]<sup>+</sup>: 436.2020, found: 436.2015.

**5'-methoxyl-2-(5-hydroxy-1H-indol-3-yl)-1',2',3',3a'-tetrahydro-5'H-spiro[indole-3,4'-pyrrolo[1,2-a]quinolin]-5-ol (4r)**

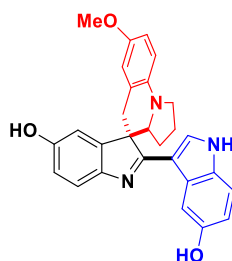

Flash column chromatography on a silica gel (ethyl acetate: petroleum ether, 1:4) afforded the product (34.5 mg, 73% yield) as a yellow solid.

**<sup>1</sup>H NMR** (500 MHz, DMSO)  $\delta$  11.51 (s, 1H), 9.03 (s, 1H), 8.90 (s, 1H), 8.13 (s, 1H), 8.04 (d,  $J = 2.8$  Hz, 1H), 7.32 (d,  $J = 8.2$  Hz, 1H), 7.25 (d,  $J = 8.6$  Hz, 1H), 6.82 (dd,  $J = 8.7, 2.9$  Hz, 1H), 6.72 (dd,  $J = 8.8, 2.4$  Hz, 2H), 6.68 (dd,  $J = 8.2, 2.3$  Hz, 1H), 6.59 (d,  $J = 8.8$  Hz, 1H), 6.06 (d,  $J = 2.1$  Hz, 1H), 4.24 (dd,  $J = 9.3, 6.0$  Hz, 1H), 3.72 (d,  $J = 16.2$  Hz, 1H), 3.67 (s, 3H), 3.47 – 3.42 (m, 1H), 3.27 – 3.19 (m, 1H), 2.54 (s, 1H), 1.82 – 1.66 (m, 2H), 1.40 (m, 1H), 0.61 – 0.50 (m, 1H); **<sup>13</sup>C NMR** (125 MHz, DMSO)  $\delta$  175.1, 154.4, 152.7, 150.5, 149.2, 141.5, 139.2, 131.1, 129.3, 127.8, 120.4, 119.4, 115.6, 114.4, 113.7, 113.0, 112.3, 112.0, 111.5, 109.0, 108.2, 62.9, 57.4, 55.7, 48.0, 38.4, 26.9, 23.2. **HRMS (ESI)**: calcd. for C<sub>28</sub>H<sub>26</sub>N<sub>3</sub>O<sub>3</sub> [M+H]<sup>+</sup>: 452.1969, found: 452.1985.

**5'-fluoro-2-(5-hydroxy-1H-indol-3-yl)-1',2',3',3a'-tetrahydro-5'H-spiro[indole-3,4'-pyrrolo[1,2-a]quinolin]-5-ol (4s)**

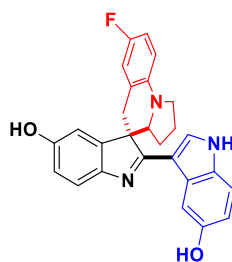

Flash column chromatography on a silica gel (ethyl acetate: petroleum ether, 1:4) afforded the product (33.9 mg, 74% yield) as a yellow solid.

**<sup>1</sup>H NMR** (500 MHz, DMSO)  $\delta$  11.51 (s, 1H), 9.12 (t,  $J = 4.1$  Hz, 1H), 8.98 (t,  $J = 4.1$  Hz, 1H), 8.11 (s, 1H), 8.04 (s, 1H), 7.34 (dt,  $J = 8.3, 4.3$  Hz, 1H), 7.27 (dt,  $J = 8.6, 4.2$  Hz, 1H), 7.03 (dd,  $J = 11.8, 5.5$  Hz, 1H), 6.93 (d,  $J = 9.1$  Hz, 1H), 6.76 – 6.71 (m, 1H), 6.69 (dt,  $J = 8.3, 2.6$  Hz, 1H), 6.61 (dd,  $J = 6.9, 4.1$  Hz, 1H), 6.00 (d,  $J = 2.4$  Hz, 1H), 4.29 – 4.25 (m, 1H), 3.73 (s, 2H), 3.22 – 3.16 (m, 1H), 2.56 (s, 1H), 1.77 (dd,  $J = 21.3, 12.4$  Hz, 2H), 1.40 (s, 1H), 0.61 – 0.51 (m, 1H); **<sup>13</sup>C NMR** (125 MHz, DMSO)  $\delta$  174.9, 154.4, 154.2 (d,  $J = 220.3$  Hz), 152.6, 149.2, 141.4, 141.1, 131.1, 129.3, 127.7, 120.7 (d,  $J = 7.5$  Hz), 119.5, 116.1 (d,  $J = 22.5$  Hz), 114.5, 114.2 (d,  $J = 21.3$  Hz), 113.1, 112.3, 111.8, 111.1 (d,  $J = 8.8$  Hz), 108.8, 108.1, 62.8, 56.8, 48.1, 38.1, 26.9, 23.2. **HRMS (ESI)**: calcd. for C<sub>27</sub>H<sub>23</sub>FN<sub>3</sub>O<sub>2</sub> [M+H]<sup>+</sup>: 440.1769, found: 440.1753.

**5'-chloro-2-(5-hydroxy-1H-indol-3-yl)-1',2',3',3a'-tetrahydro-5'H-spiro[indole-3,4'-pyrrolo[1,2-a]quinolin]-5-ol (4t)**

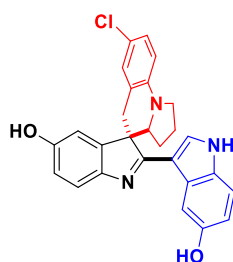

Flash column chromatography on a silica gel (ethyl acetate: petroleum ether, 1:4) afforded the product (28.6 mg, 60% yield) as a yellow solid.

**<sup>1</sup>H NMR** (500 MHz, DMSO)  $\delta$  11.52 (d,  $J = 2.4$  Hz, 1H), 9.13 (s, 1H), 8.97 (s, 1H), 8.11 (d,  $J = 2.4$  Hz, 1H), 8.05 (d,  $J = 3.0$  Hz, 1H), 7.34 (d,  $J = 8.2$  Hz, 1H), 7.26 (d,  $J = 8.6$  Hz, 1H), 7.20 (dd,  $J = 8.6, 2.4$  Hz, 1H), 7.08 (d,  $J = 2.3$  Hz, 1H), 6.73 (dd,  $J = 8.6, 2.5$  Hz, 1H), 6.69 (dd,  $J = 8.3, 2.4$  Hz, 1H), 6.62 (d,  $J = 8.8$  Hz, 1H), 5.97 (d,  $J = 2.4$  Hz, 1H), 4.30 (dd,  $J = 9.7, 5.9$  Hz, 1H), 3.70 (d,  $J = 16.2$  Hz, 1H), 3.17 (dd,  $J = 16.8, 8.9$  Hz, 1H), 2.55 (d,  $J = 16.4$  Hz, 1H), 1.83 – 1.70 (m, 2H), 1.44 – 1.37 (m, 1H), 0.61 – 0.52 (m, 1H); **<sup>13</sup>C NMR** (125 MHz, DMSO)  $\delta$  174.7, 154.5, 152.7, 149.2, 143.4, 141.0, 131.1, 129.3, 129.0, 127.7, 127.6, 121.3, 119.6, 118.9, 114.6, 113.1, 112.3, 111.9, 111.7, 108.8, 108.1, 62.8, 56.6, 47.9, 37.9, 26.9, 23.2. **HRMS (ESI)**: calcd. for C<sub>27</sub>H<sub>23</sub>ClN<sub>3</sub>O<sub>2</sub> [M+H]<sup>+</sup>: 456.1473, found: 456.1457.

**3'-fluoro-2-(5-hydroxy-1H-indol-3-yl)-1',2',3',3a'-tetrahydro-5'H-spiro[indole-3,4'-pyrrolo[1,2-a]quinolin]-5-ol (4u)**

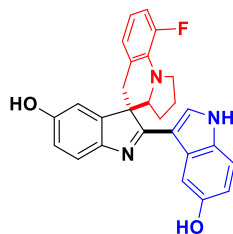

Flash column chromatography on a silica gel (ethyl acetate: petroleum ether, 1:4) afforded the product (34.4 mg, 75% yield) as a yellow solid.

**<sup>1</sup>H NMR** (500 MHz, DMSO)  $\delta$  11.52 (s, 1H), 9.14 (s, 1H), 8.96 (s, 1H), 8.13 (d,  $J = 2.1$  Hz, 1H), 8.08 (d,  $J = 2.8$  Hz, 1H), 7.35 (d,  $J = 8.2$  Hz, 1H), 7.26 (d,  $J = 8.6$  Hz, 1H), 7.06 (dd,  $J = 14.0, 8.1$  Hz, 1H), 6.89 (d,  $J = 7.4$  Hz, 1H), 6.74 – 6.68 (m, 2H), 6.63 (td,  $J = 7.8, 4.8$  Hz, 1H), 6.23 (d,  $J = 2.2$  Hz, 1H), 4.31 (t,  $J = 7.0$  Hz, 1H), 3.93 – 3.89 (m, 1H), 3.73 (d,  $J = 16.3$  Hz, 2H), 2.60 (d,  $J = 16.4$  Hz, 1H), 1.71

– 1.63 (m, 1H), 1.51 – 1.42 (m, 2H), 0.65 – 0.57 (m, 1H);  $^{13}\text{C}$  NMR (125 MHz, DMSO)  $\delta$  174.9, 154.4, 152.7, 150.8 (d,  $J = 236.3$  Hz), 149.3, 141.4, 133.4 (d,  $J = 8.8$  Hz), 131.1, 129.3, 127.7, 125.9, 123.6 (d,  $J = 5.0$  Hz), 119.6, 116.6 (d,  $J = 7.5$  Hz), 114.9 (d,  $J = 21.3$  Hz), 114.7, 113.1, 112.3, 111.7, 108.9, 108.2, 63.5, 56.8, 51.4, 38.2, 26.0, 23.8. **HRMS (ESI)**: calcd. for  $\text{C}_{27}\text{H}_{23}\text{FN}_3\text{O}_2$   $[\text{M}+\text{H}]^+$ : 440.1769, found: 440.1760.

**2'-(5-hydroxy-1H-indol-3-yl)-6a,7,8,9,10,11-hexahydro-5H-spiro[azepino[1,2-a]quinoline-6,3'-indol]-5'-ol (4v)**

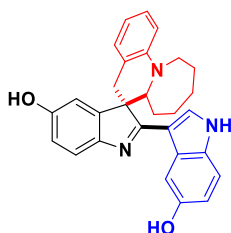

Flash column chromatography on a silica gel (ethyl acetate: petroleum ether, 1:4) afforded the product (30.1 mg, 64% yield) as a yellow solid.

$^1\text{H}$  NMR (500 MHz, DMSO)  $\delta$  11.48 (s, 1H), 9.05 (s, 1H), 8.92 (s, 1H), 8.13 (s, 1H), 8.02 (s, 1H), 7.33 (d,  $J = 8.1$  Hz, 1H), 7.26 (d,  $J = 8.6$  Hz, 1H), 7.18 (t,  $J = 7.7$  Hz, 1H), 6.99 (d,  $J = 7.3$  Hz, 1H), 6.90 (d,  $J = 8.3$  Hz, 1H), 6.73 (d,  $J = 8.6$  Hz, 1H), 6.69 (d,  $J = 8.2$  Hz, 1H), 6.65 (t,  $J = 7.3$  Hz, 1H), 6.31 (s, 1H), 4.13 (dd,  $J = 9.1, 3.8$  Hz, 1H), 3.73 – 3.69 (m, 1H), 3.63 – 3.61 (m, 1H), 3.34 (s, 1H), 2.44 (d,  $J = 16.5$  Hz, 1H), 1.78 (d,  $J = 6.5$  Hz, 2H), 1.55 – 1.52 (m, 2H), 1.50 – 1.48 (m, 1H), 1.16 (dd,  $J = 20.8, 10.3$  Hz, 2H), 0.91 – 0.87 (m, 1H);  $^{13}\text{C}$  NMR (125 MHz, DMSO)  $\delta$  175.6, 154.3, 152.7, 149.1, 148.4, 142.1, 131.2, 129.9, 129.0, 127.7, 127.6, 120.8, 119.5, 116.8, 114.4, 113.6, 113.0, 112.3, 112.3, 109.1, 108.1, 63.1, 59.7, 50.4, 38.9, 30.3, 29.2, 28.1, 26.8. **HRMS (ESI)**: calcd. for  $\text{C}_{29}\text{H}_{28}\text{N}_3\text{O}_2$   $[\text{M}+\text{H}]^+$ : 450.2176, found: 450.2164.

**2-(5-hydroxy-1H-indol-3-yl)-6a',6b',7',8',9',10',10a',11'-octahydro-5'H-spiro[indole-3,6'-isoindolo[2,1-a]quinolin]-5-ol (4w)**

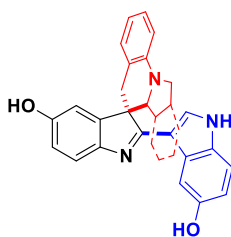

Flash column chromatography on a silica gel (ethyl acetate: petroleum ether, 1:4) afforded the product (27.3 mg, 55% yield) as a yellow solid.

$^1\text{H}$  NMR (500 MHz, DMSO)  $\delta$  11.47 (d,  $J = 1.9$  Hz, 1H), 9.07 (s, 1H), 8.94 (s, 1H), 8.17 (d,  $J = 2.8$  Hz, 1H), 8.13 (d,  $J = 2.2$  Hz, 1H), 7.33 (d,  $J = 8.2$  Hz, 1H), 7.25 (d,  $J = 8.6$  Hz, 1H), 7.17 (t,  $J = 7.7$  Hz, 1H), 6.96 (d,  $J = 7.3$  Hz, 1H), 6.72 (dd,  $J = 8.6, 2.3$  Hz, 1H), 6.66 (dd,  $J = 8.2, 2.3$  Hz, 1H), 6.62 (d,  $J = 8.2$  Hz, 1H), 6.55 (t,  $J = 7.3$  Hz, 1H), 5.93 (d,  $J = 2.3$  Hz, 1H), 4.55 (d,  $J = 9.8$  Hz, 1H), 3.76 (d,  $J = 15.8$  Hz, 1H), 3.22 (q,  $J = 9.5$  Hz, 2H), 2.43 (d,  $J = 16.0$  Hz, 1H), 1.93 (dd,  $J = 11.3, 5.5$  Hz, 1H), 1.63 – 1.54 (m, 1H), 1.46 (d,  $J = 12.6$  Hz, 1H), 1.37 (dd,  $J = 25.1, 12.5$  Hz, 1H), 1.23 (s, 1H), 1.16 (d,  $J = 12.9$  Hz, 1H), 1.08 – 0.95 (m, 2H), 0.83 (t,  $J = 11.5$  Hz, 2H);  $^{13}\text{C}$  NMR (125 MHz, DMSO)  $\delta$  175.7, 154.3, 152.6, 149.2, 145.0, 141.4, 131.1, 129.8, 129.4, 128.2, 127.7, 119.7, 118.9, 115.2, 114.3, 112.9, 112.2, 111.9,

110.2, 109.5, 108.2, 61.6, 56.6, 56.6, 55.3, 53.9, 36.9, 28.8, 25.2, 25.0, 21.5. **HRMS (ESI):** calcd. for  $C_{31}H_{30}N_3O_2$   $[M+H]^+$ : 476.2333, found: 476.2303.

**2-(1-allyl-5-allyloxy-indol-3-yl)-1',2',3',3a'-tetrahydro-5'H-spiro[indole-3,4'-pyrrolo[1,2-a]quinolin]-5-allyloxy (5l)**

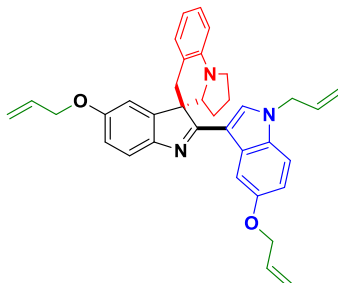

Flash column chromatography on a silica gel (ethyl acetate: petroleum ether, 1:25) afforded the product (17.6 mg, 65% yield) as a yellow solid.

**$^1H$  NMR** (500 MHz,  $CDCl_3$ )  $\delta$  8.42 (d,  $J = 2.4$  Hz, 1H), 7.51 (d,  $J = 8.4$  Hz, 1H), 7.43 (s, 1H), 7.19 – 7.14 (m, 3H), 6.97 – 6.91 (m, 2H), 6.78 (dd,  $J = 8.4, 2.5$  Hz, 1H), 6.61 – 6.53 (m, 2H), 6.17 (d,  $J = 2.4$  Hz, 1H), 6.10 (m, 1H), 5.93 (m, 1H), 5.82 (m, 1H), 5.45 (dd,  $J = 17.2, 1.3$  Hz, 1H), 5.25 (d,  $J = 10.5$  Hz, 1H), 5.18 (m, 2H), 5.10 (s, 1H), 5.08 (d,  $J = 6.5$  Hz, 1H), 4.65 (d,  $J = 5.4$  Hz, 4H), 4.19 (d,  $J = 5.4$  Hz, 2H), 4.11 (dd,  $J = 9.6, 5.8$  Hz, 1H), 3.63 (dd,  $J = 15.0, 5.9$  Hz, 1H), 3.44 (td,  $J = 8.6, 2.8$  Hz, 1H), 3.22 (dd,  $J = 16.7, 8.5$  Hz, 1H), 2.65 (d,  $J = 16.3$  Hz, 1H), 1.75 – 1.67 (m, 2H), 1.16 (m, 1H), 0.73 – 0.63 (m, 1H);  **$^{13}C$  NMR** (125 MHz,  $CDCl_3$ )  $\delta$  175.1, 155.9, 154.9, 144.2, 140.8, 134.1, 133.5, 132.6, 131.8, 129.7, 128.9, 128.2, 120.0, 118.5, 118.4, 117.6, 117.5, 115.9, 114.2, 110.8, 110.4, 110.2, 107.3, 69.7, 69.1, 63.3, 57.6, 49.5, 47.6, 38.0, 30.6, 29.7, 26.9, 23.3, 19.2, 13.7. **HRMS (ESI):** calcd. for  $C_{36}H_{36}N_3O_2$   $[M+H]^+$ : 542.2802, found: 542.2789.

**2-(5-methoxy-1H-indol-3-yl)-1',2',3',3a'-tetrahydro-5'H-spiro[indole-3,4'-pyrrolo[1,2-a]quinolin]-5-trifluoromethanesulfonate (6i)**

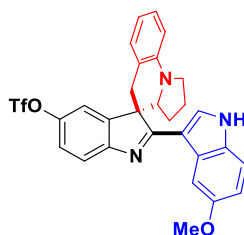

Flash column chromatography on a silica gel (ethyl acetate: petroleum ether, 1:25) afforded the product (53.9 mg, 68% yield) as a yellow solid.

**$^1H$  NMR** (500 MHz,  $CDCl_3$ )  $\delta$  8.86 (s, 1H), 8.31 (d,  $J = 2.4$  Hz, 1H), 7.62 (d,  $J = 8.5$  Hz, 1H), 7.38 (s, 1H), 7.22 (d,  $J = 7.7$  Hz, 1H), 7.17 (dd,  $J = 12.3, 7.9$  Hz, 1H), 7.14 (dd,  $J = 8.4, 2.4$  Hz, 1H), 7.10 (d,  $J = 8.8$  Hz, 1H), 6.91 (d,  $J = 7.4$  Hz, 1H), 6.84 (dd,  $J = 8.8, 2.4$  Hz, 1H), 6.62 (t,  $J = 7.4$  Hz, 1H), 6.59 (s, 1H), 6.42 (d,  $J = 2.4$  Hz, 1H), 3.96 (dd,  $J = 9.2, 6.1$  Hz, 1H), 3.84 (s, 3H), 3.53 – 3.47 (m, 1H), 3.43 (td,  $J = 8.7, 3.2$  Hz, 1H), 3.21 (q,  $J = 8.3$  Hz, 1H), 2.59 (d,  $J = 16.2$  Hz, 1H), 1.72 – 1.61 (m, 2H), 1.43 (m, 1H), 1.35 (s, 1H), 1.25 – 1.16 (m, 1H), 0.81 – 0.74 (m, 1H), 0.54 (dd,  $J = 20.8, 10.8$  Hz, 1H);  **$^{13}C$  NMR** (125 MHz,  $CDCl_3$ )  $\delta$  179.4, 156.2, 155.7, 146.4, 143.8, 141.0, 131.1, 129.6, 128.5, 128.2, 127.2, 123.8, 121.2, 120.2, 117.8, 117.3, 116.3, 114.2, 111.9, 110.6, 110.3, 105.7, 63.5, 58.3, 55.9, 47.4, 38.1, 26.9, 23.1. **HRMS (ESI):** calcd. for  $C_{29}H_{25}F_3N_3O_4S$   $[M+H]^+$ : 568.1512, found: 568.1503.



**4-(diethylamino)-1',2',3',3a'-tetrahydro-5'H-spiro[cyclohexane-1,4'-pyrrolo[1,2-a]quinoline]-2,4-dien-6-one (8a)**

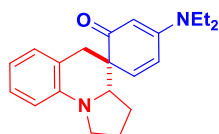

Flash column chromatography on a silica gel (ethyl acetate: petroleum ether, 1:8) gave the product (31.2 mg, 97% yield) as a yellow solid.

**<sup>1</sup>H NMR** (500 MHz, CDCl<sub>3</sub>) 7.12 (t, *J* = 7.7 Hz, 1H), 7.02 (d, *J* = 7.3 Hz, 1H), 6.57 (t, *J* = 7.3 Hz, 1H), 6.49 (d, *J* = 8.1 Hz, 1H), 6.39 (dd, *J* = 10.5, 1.9 Hz, 1H), 6.15 (dd, *J* = 10.4, 2.1 Hz, 1H), 5.33 (s, 1H), 3.85 (dd, *J* = 9.9, 5.0 Hz, 1H), 3.52 – 3.43 (m, 2H), 3.37 (q, *J* = 7.0 Hz, 4H), 3.18 (d, *J* = 7.5 Hz, 1H), 2.61 (d, *J* = 15.8 Hz, 1H), 2.00 – 1.86 (m, 3H), 1.30 (dd, *J* = 10.3, 7.9 Hz, 1H), 1.21 (t, *J* = 7.0 Hz, 6H); **<sup>13</sup>C NMR** (125 MHz, CDCl<sub>3</sub>) δ 197.4, 156.5, 143.9, 143.2, 129.1, 127.3, 119.9, 118.6, 114.9, 110.1, 96.6, 64.4, 47.2, 45.7, 44.9, 39.8, 27.8, 23.5. **HRMS (ESI)**: calcd. for C<sub>21</sub>H<sub>26</sub>N<sub>2</sub>O [M+H]<sup>+</sup>: 323.2045, found: 323.2047.

## Reference

1. I. D. Jurberg, B. Peng, E. W. C. Stiefel, M. Wasserloos and N. Maulide, *Angew. Chem. Int. Ed.*, 2012, **51**, 1950.
2. G. Bai, F. Dong, L. Xu, Y. Liu, L. Wang and S.-S. Li, *Org. Lett.* 2019, **21**, 6225.
3. S.-S. Li, X. Lv, D. Ren, C.-L. Shao, Q. Liu and J. Xiao, *Chem. Sci.* 2018, **9**, 8253.

## 4. Crystal Structures and Data

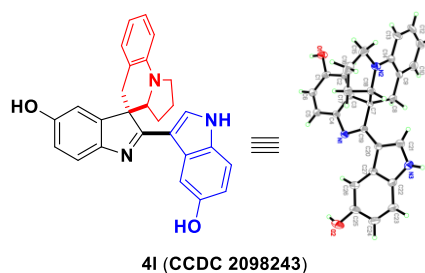

Table 1. Crystal data and structure refinement for **4I**.

|                                   |                                                               |                        |
|-----------------------------------|---------------------------------------------------------------|------------------------|
| Identification code               | <b>4I</b>                                                     |                        |
| Empirical formula                 | C <sub>27</sub> H <sub>23</sub> N <sub>3</sub> O <sub>2</sub> |                        |
| Formula weight                    | 842.97                                                        |                        |
| Temperature                       | 293(2) K                                                      |                        |
| Wavelength                        | 1.54184 Å                                                     |                        |
| Crystal system, space group       | Triclinic, P-1                                                |                        |
| Unit cell dimensions              | a = 10.0368(4) Å                                              | alpha = 92.957(4) deg. |
|                                   | b = 13.6087(6) Å                                              | beta = 95.422(3) deg.  |
|                                   | c = 20.5575(9) Å                                              | gamma = 90.160(4) deg. |
| Volume                            | 2791.5(2) Å <sup>3</sup>                                      |                        |
| Z, Calculated density             | 2, 1.003 Mg/m <sup>3</sup>                                    |                        |
| Absorption coefficient            | 0.511 mm <sup>-1</sup>                                        |                        |
| F(000)                            | 888                                                           |                        |
| Crystal size                      | 0.120 x 0.110 x 0.110 mm                                      |                        |
| Theta range for data collection   | 3.811 to 67.230 deg.                                          |                        |
| Limiting indices                  | -8<=h<=12, -16<=k<=16, -24<=l<=24                             |                        |
| Reflections collected / unique    | 20183 / 9964 [R(int) = 0.0496]                                |                        |
| Completeness to theta = 67.230    | 99.7 %                                                        |                        |
| Refinement method                 | Full-matrix least-squares on F <sup>2</sup>                   |                        |
| Data / restraints / parameters    | 9964 / 0 / 581                                                |                        |
| Goodness-of-fit on F <sup>2</sup> | 1.044                                                         |                        |
| Final R indices [I>2sigma(I)]     | R1 = 0.0754, wR2 = 0.2702                                     |                        |
| R indices (all data)              | R1 = 0.1157, wR2 = 0.3100                                     |                        |
| Extinction coefficient            | n/a                                                           |                        |
| Largest diff. peak and hole       | 0.753 and -0.262 e.Å <sup>-3</sup>                            |                        |

## 5. <sup>1</sup>H and <sup>13</sup>C NMR Spectra

### 2-(4-(diethylamino)-2-hydroxyphenyl)-1',2',3',3a'-tetrahydro-5'H-spiro[indole-3,4'-pyrrolo[1,2-a]quinolin]-5-ol (4a)

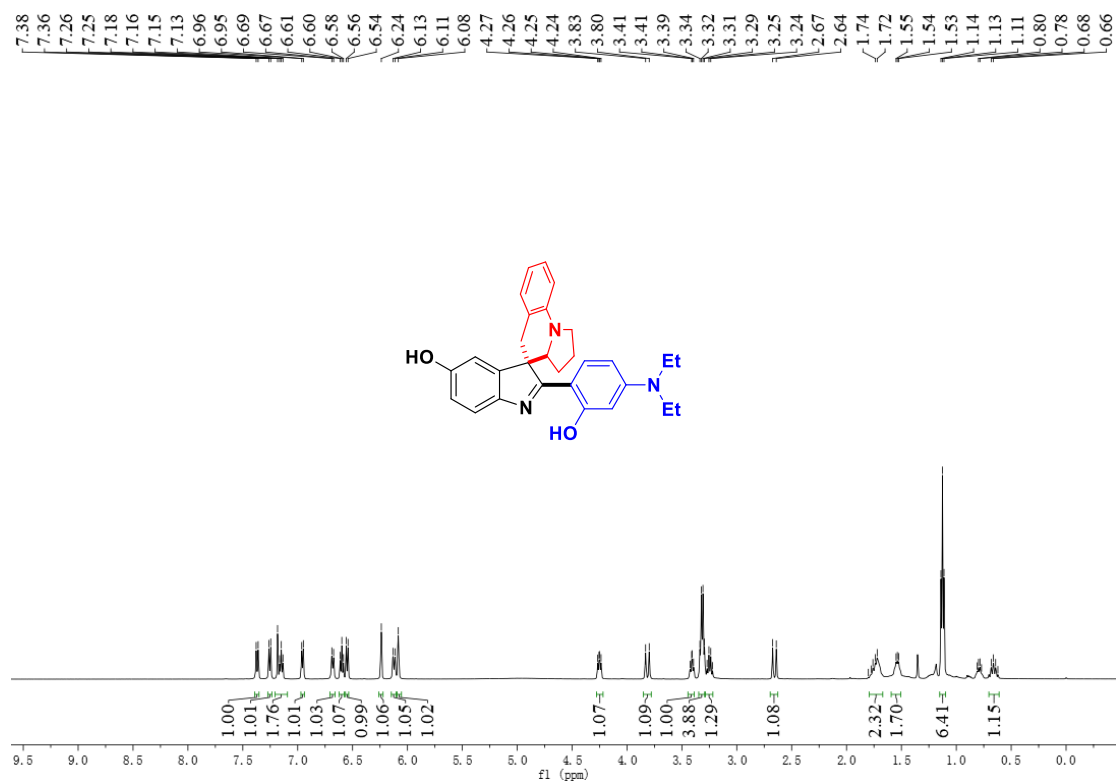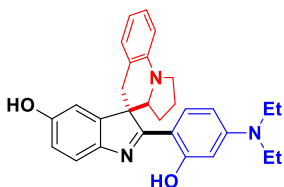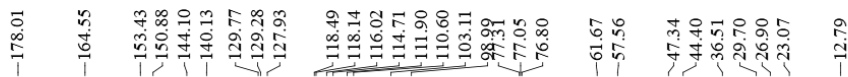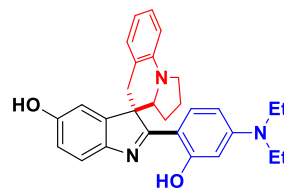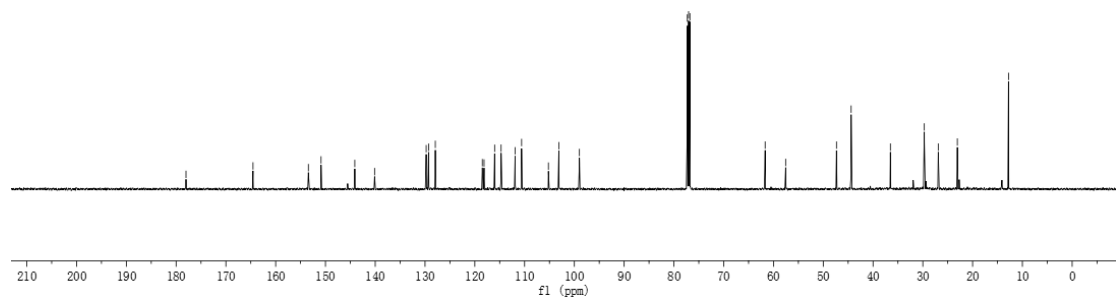

**2-(4-(diethylamino)-2-hydroxyphenyl)-6'-fluoro-1',2',3',3a'-tetrahydro-5'H-spiro[indole-3,4'-pyrrolo[1,2-a]quinolin]-5-ol (4b)**

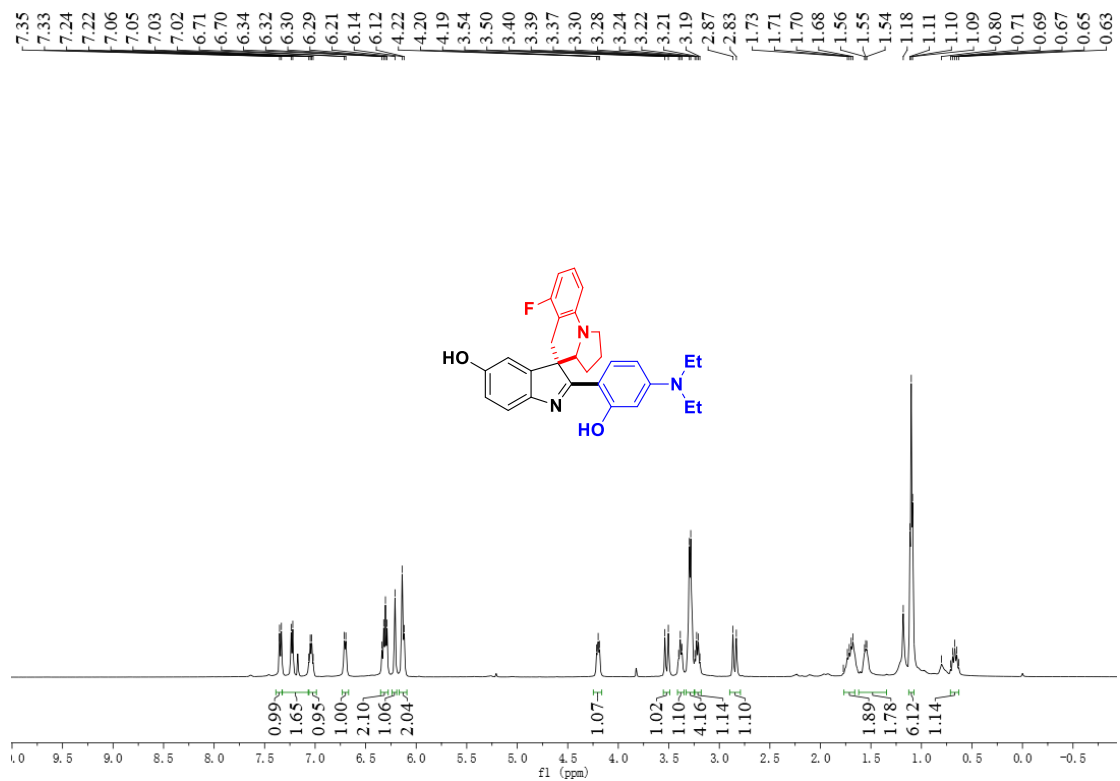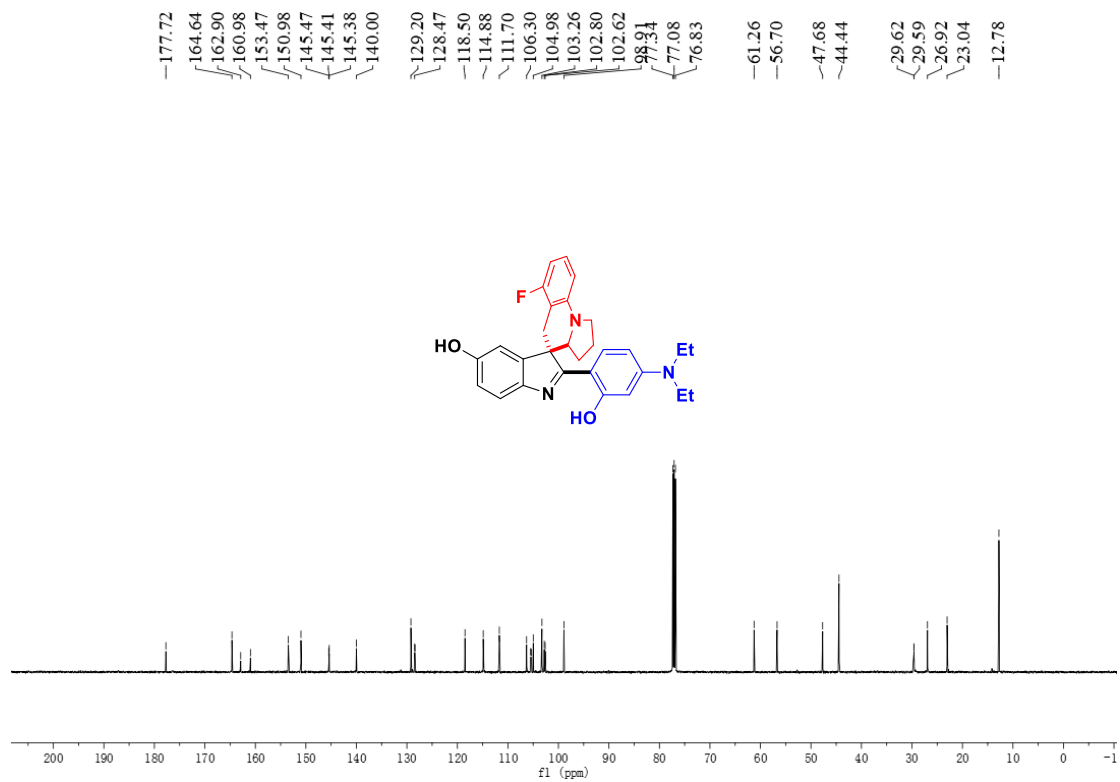

**6'-chloro-2-(4-(diethylamino)-2-hydroxyphenyl)-1',2',3,3a'-tetrahydro-5'H-spiro[indole-3,4'-pyrrolo[1,2-a]quinolin]-5-ol (4c)**

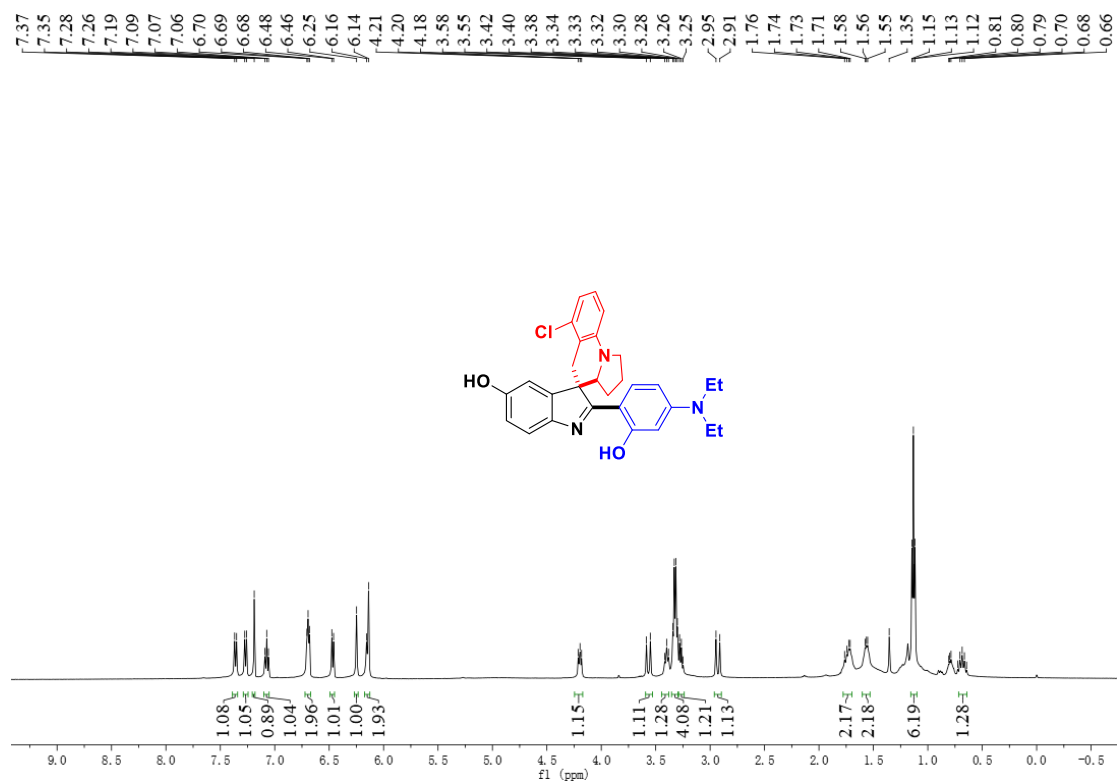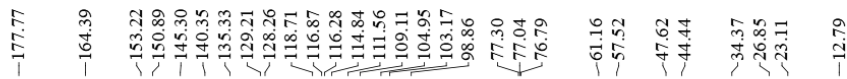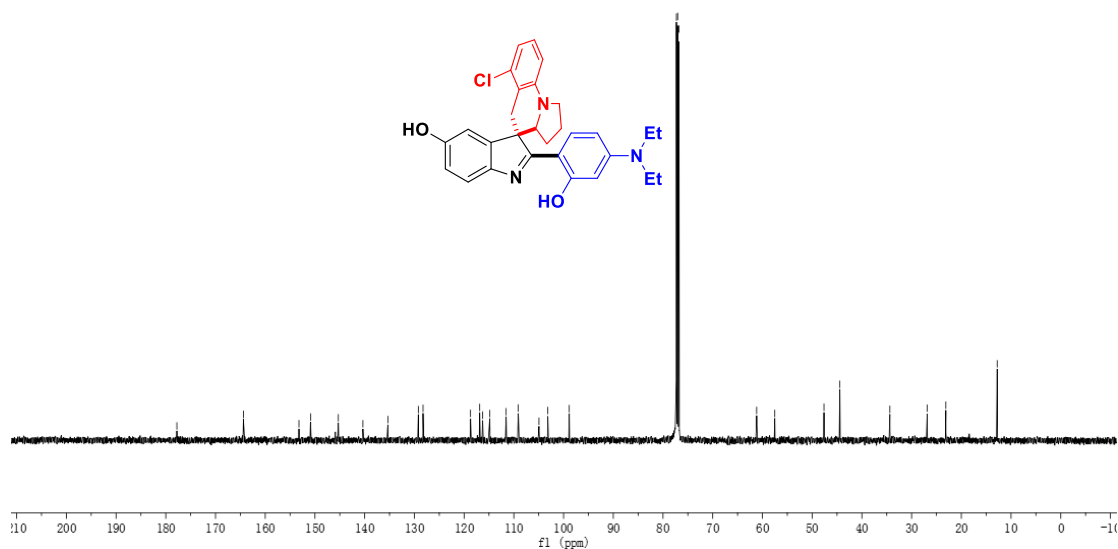

**6'-bromo-2-(4-(diethylamino)-2-hydroxyphenyl)-1',2',3',3a'-tetrahydro-5'H-spiro[indole-3,4'-pyrrolo[1,2-a]quinolin]-5-ol (4d)**

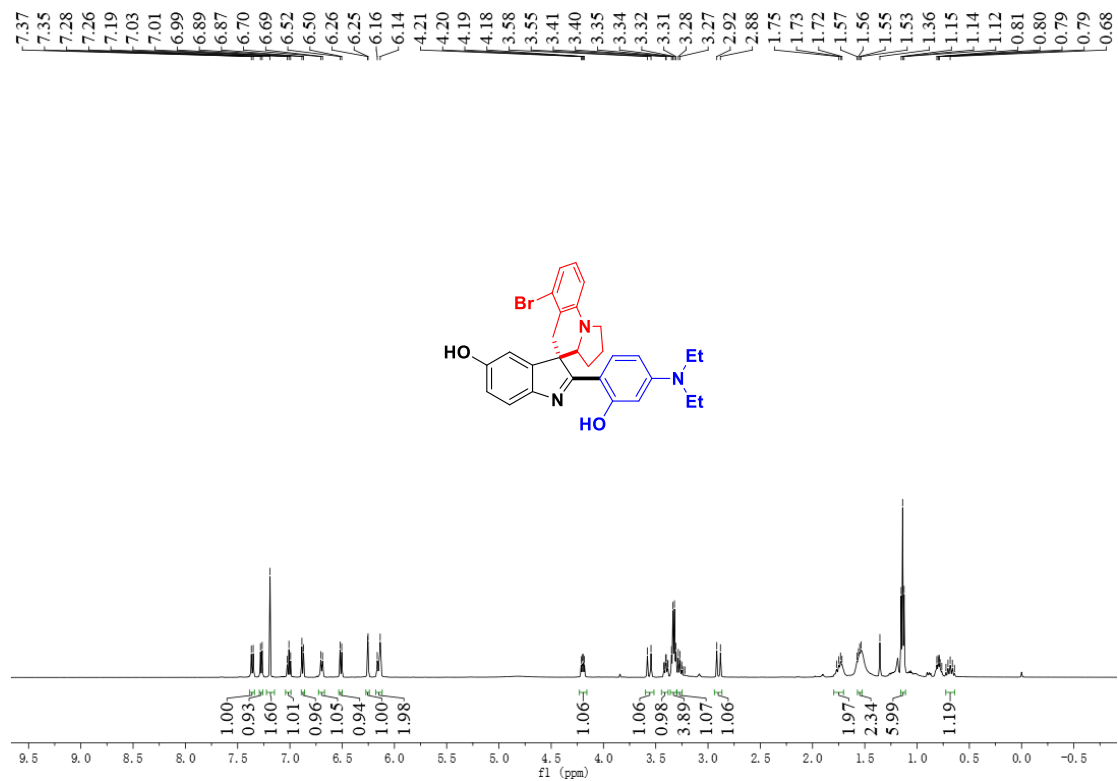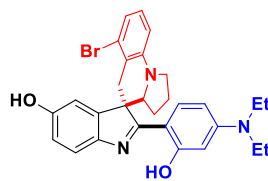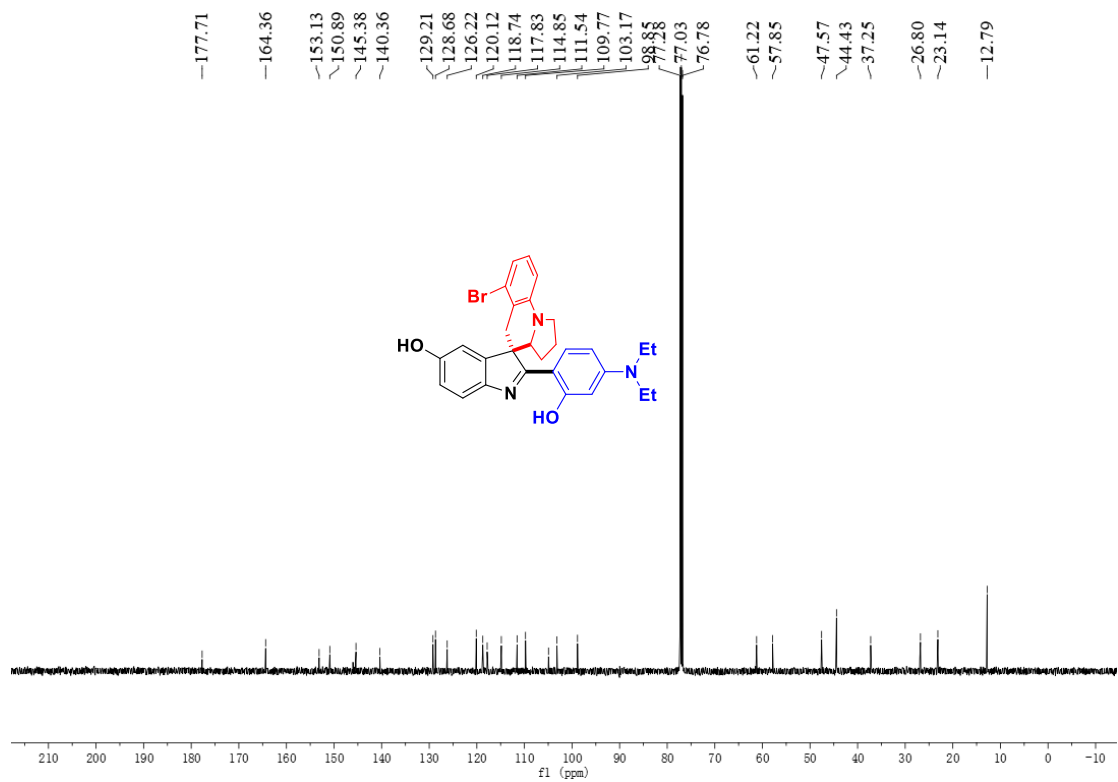

**(2-hydroxy-4-(pyrrolidin-1-yl)phenyl)-1',2',3',3a'-tetrahydro-5'H-spiro[indole-3,4'-pyrrolo[1,2-a]quinolin]-5-ol (4e)**

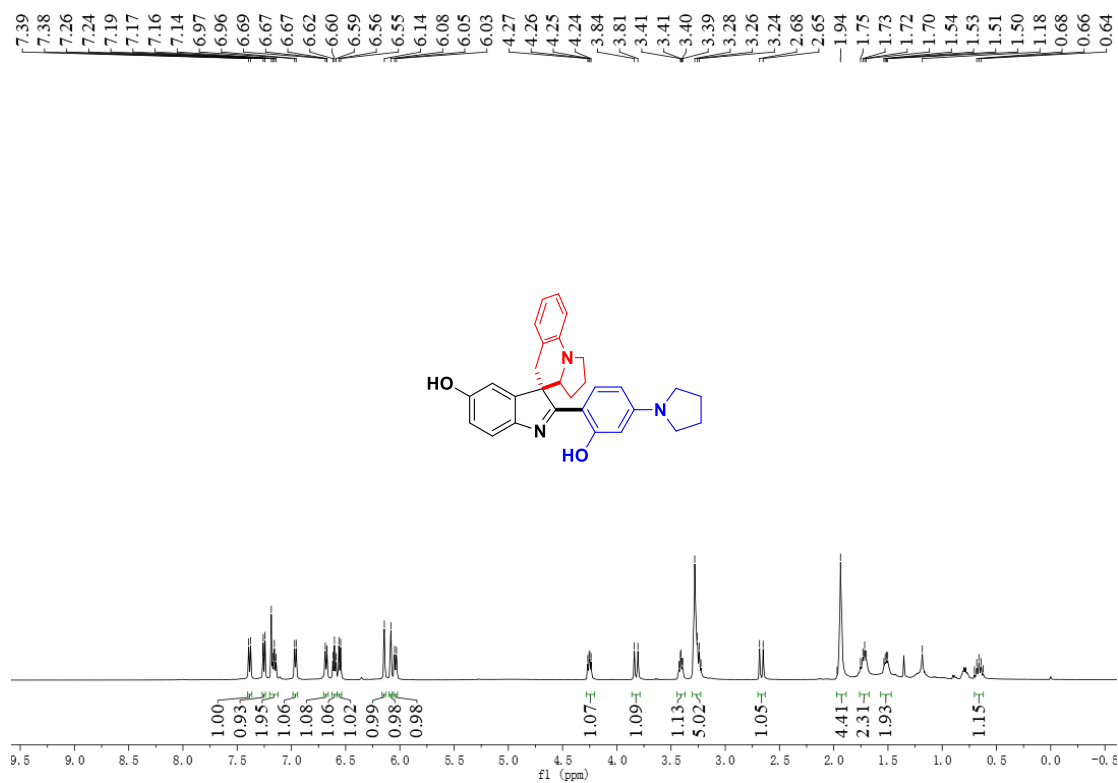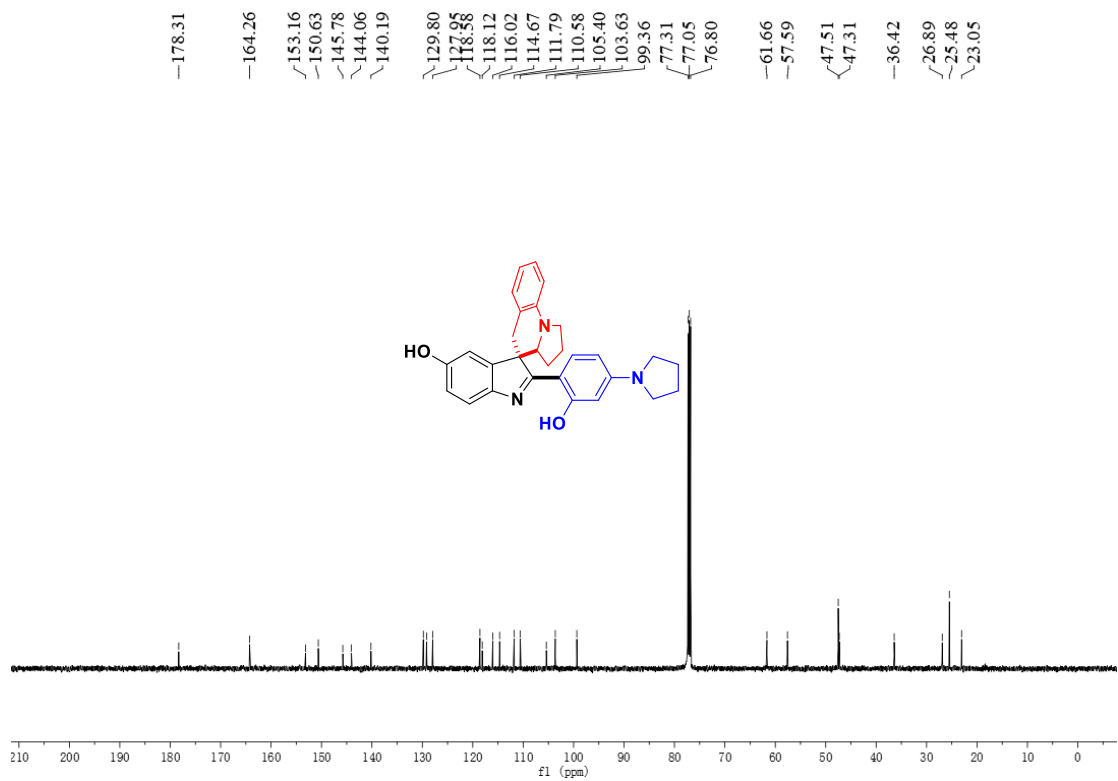

**2-(4-amino-2-hydroxyphenyl)-1',2',3',3a'-tetrahydro-5'H-spiro[indole-3,4'-pyrrolo[1,2-a]quinolin]-5-ol (4f)**

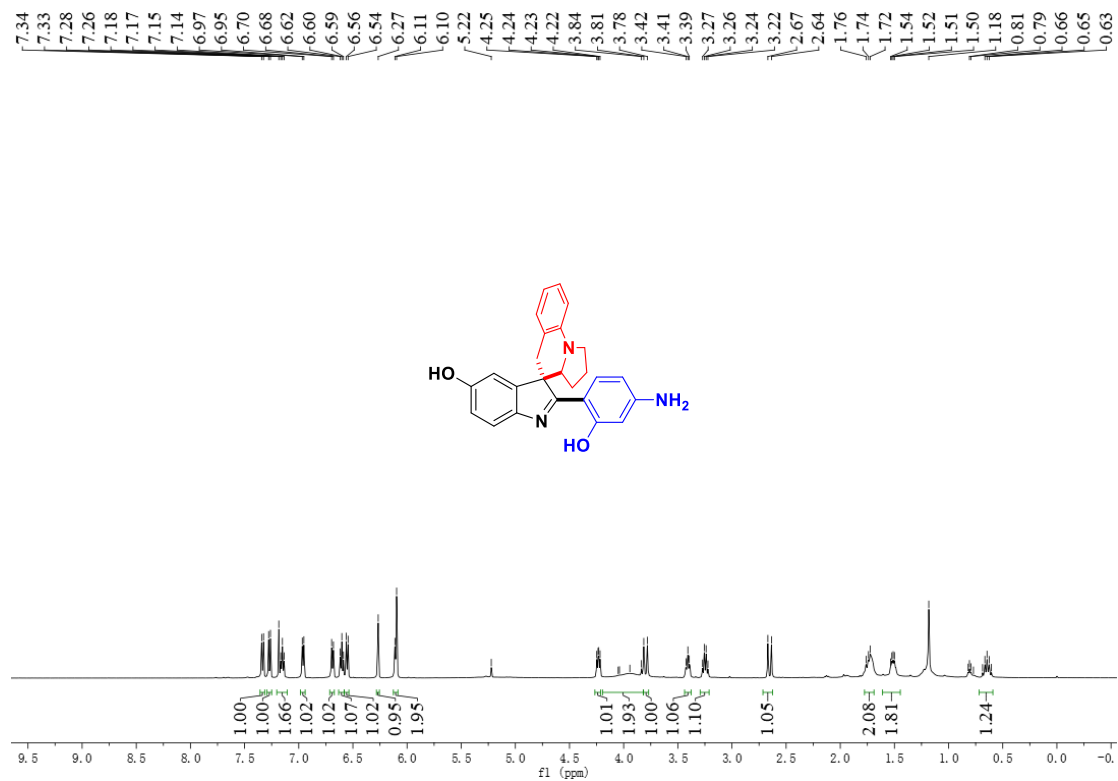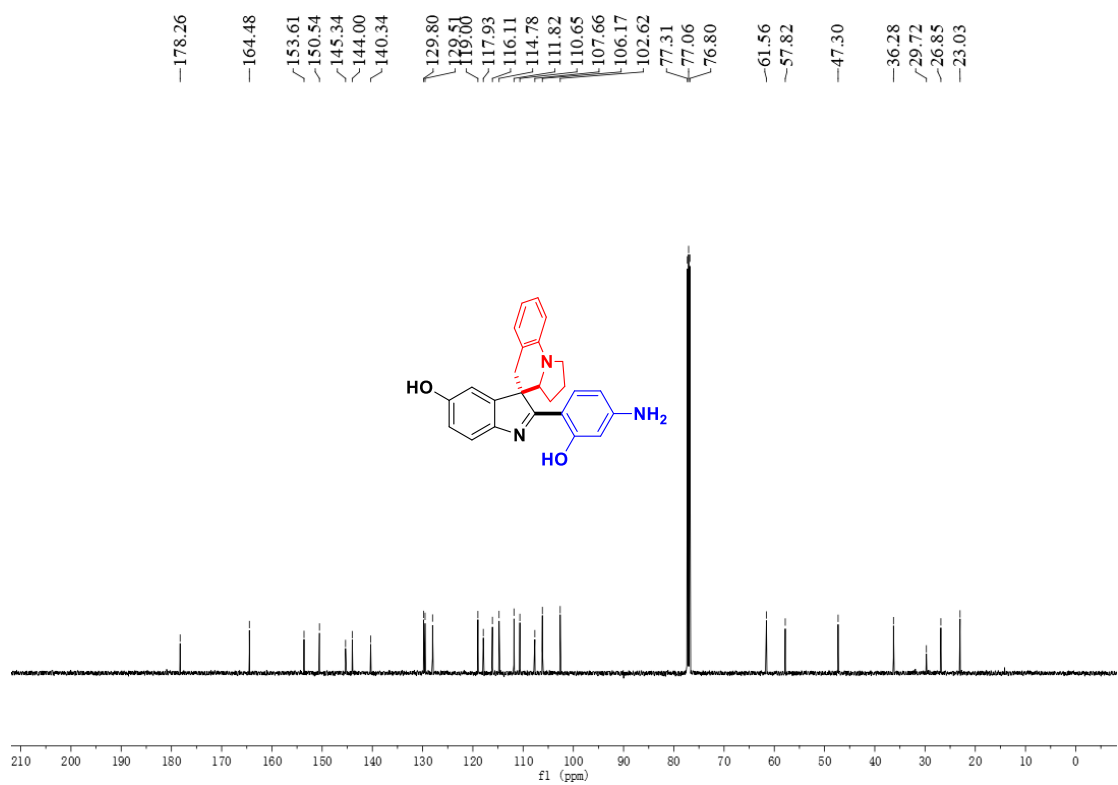



**2-(6-hydroxybenzo[d][1,3]dioxol-5-yl)-1',2',3',3a'-tetrahydro-5'H-spiro[indole-3,4'-pyrrolo[1,2-a]quinolin]-5-ol (4g)**

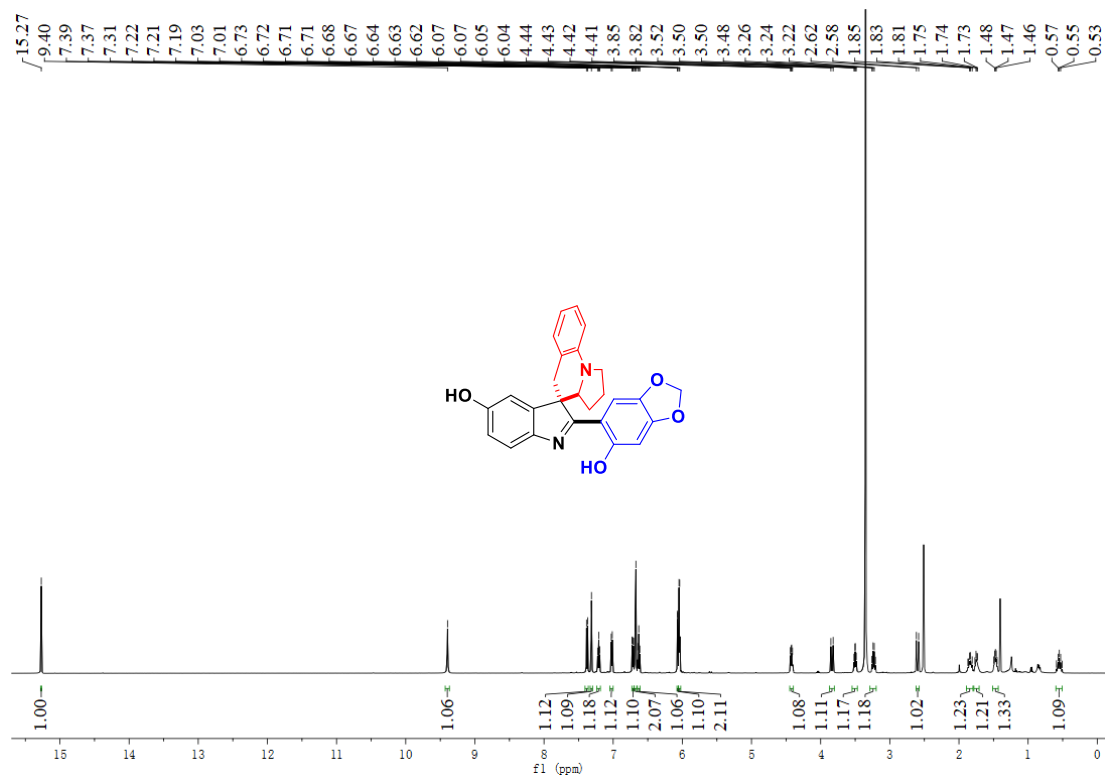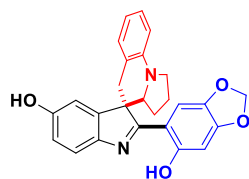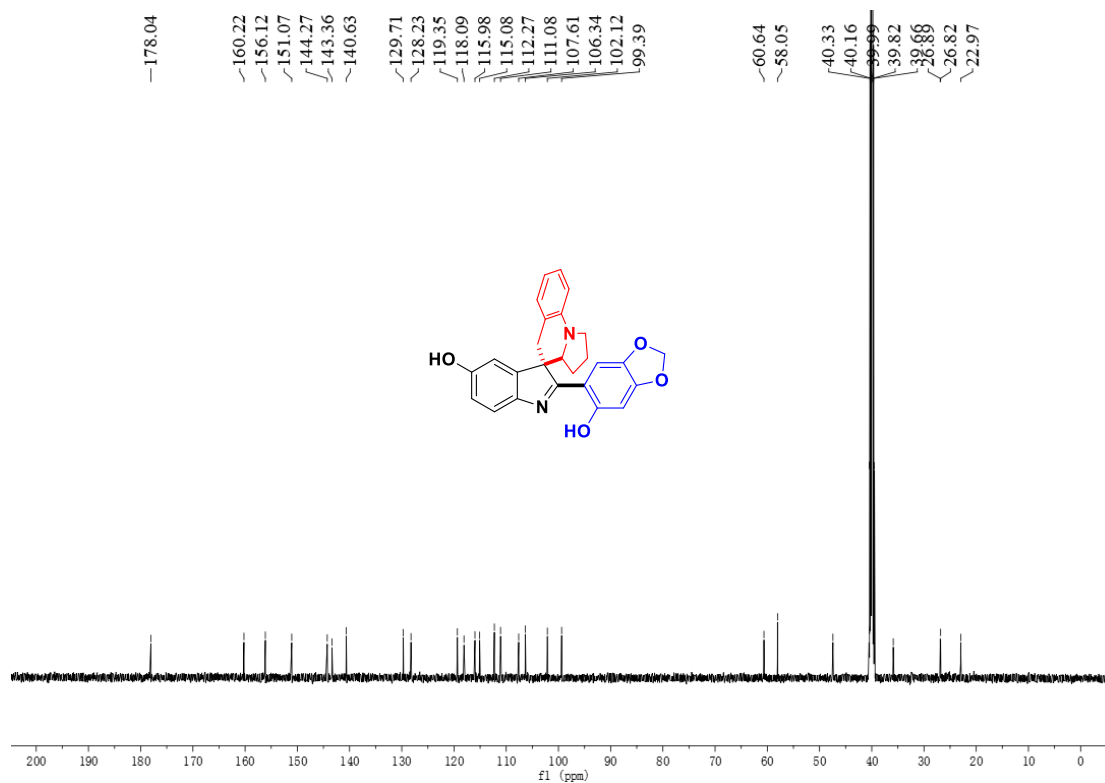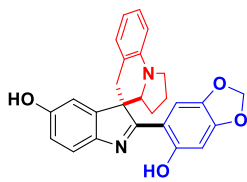

**2-(1H-indol-3-yl)-1',2',3',3a'-tetrahydro-5'H-spiro[indole-3,4'-pyrrolo[1,2-a]quinolin]-5-ol  
(4h)**

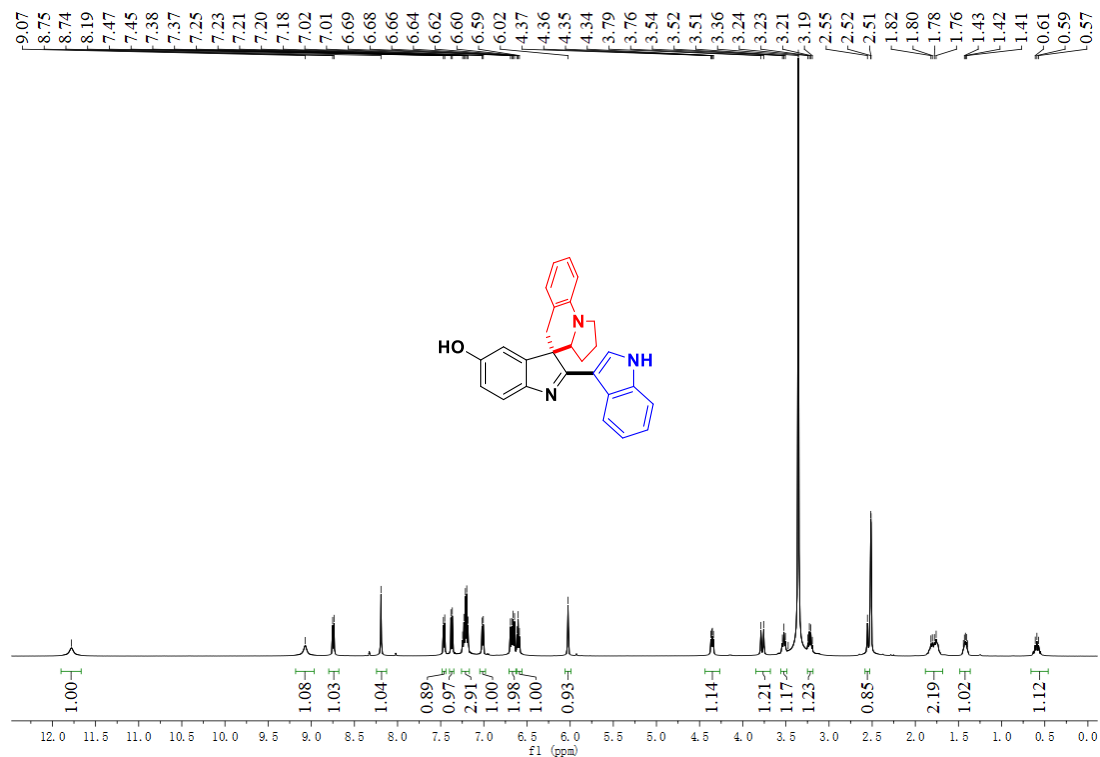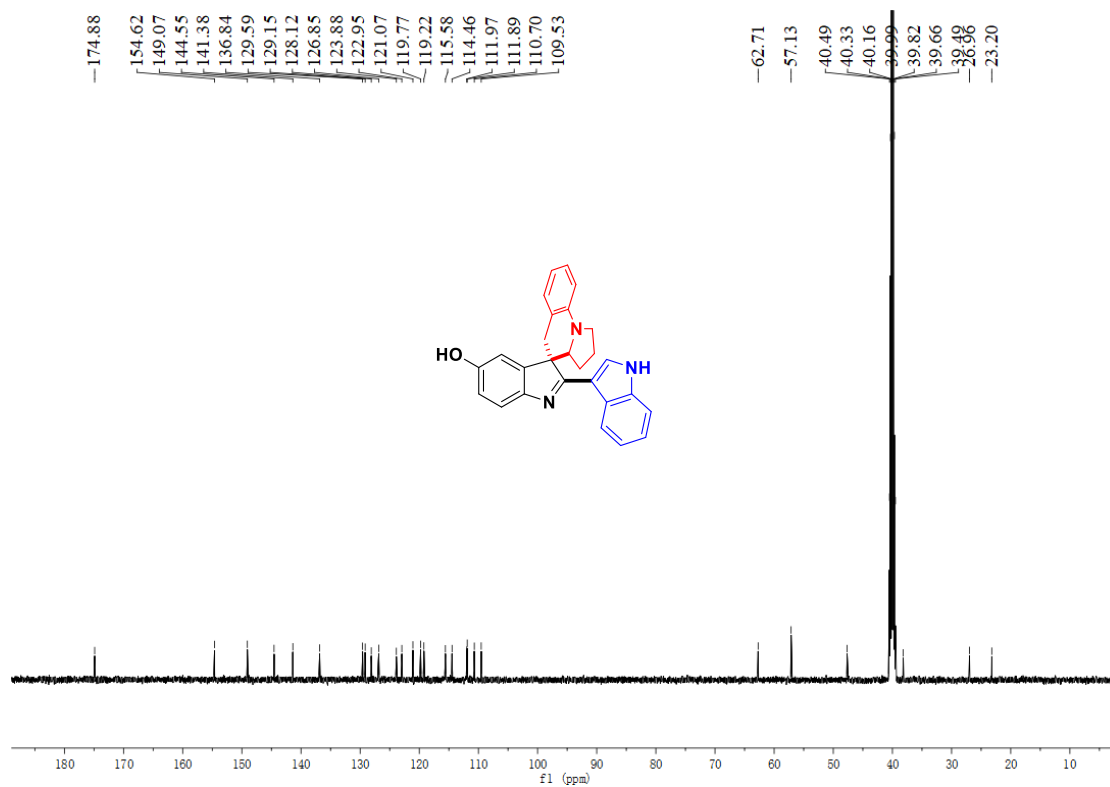

**2-(5-methoxy-1H-indol-3-yl)-1',2',3',3a'-tetrahydro-5'H-spiro[indole-3,4'-pyrrolo[1,2-a]quinolin]-5-ol (4i)**

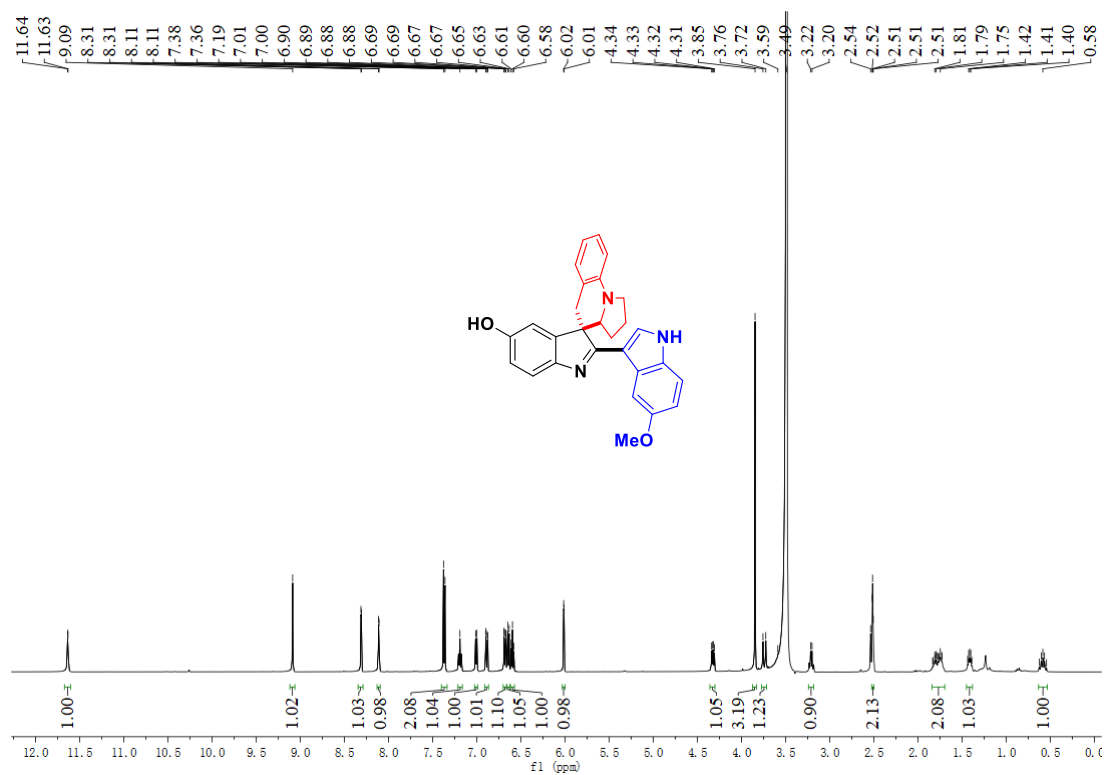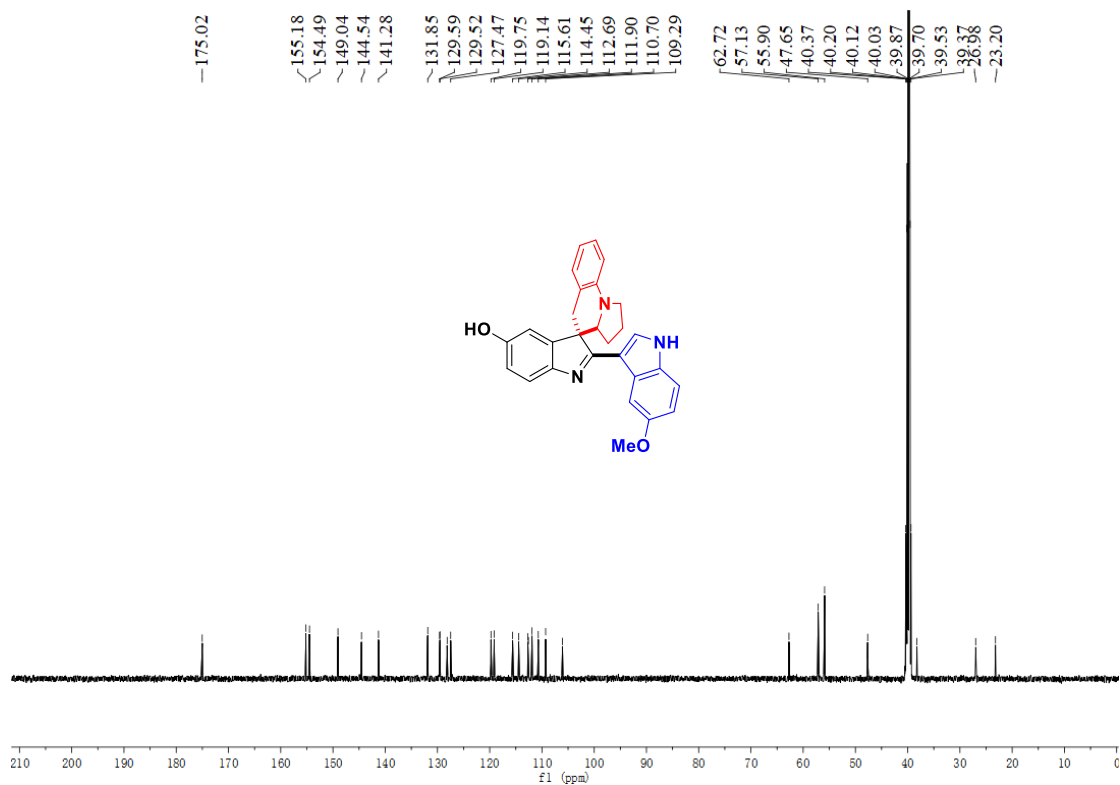

**2-(5-fluoro-1H-indol-3-yl)-1',2',3',3a'-tetrahydro-5'H-spiro[indole-3,4'-pyrrolo[1,2-a]quinolin]-5-ol (4j)**

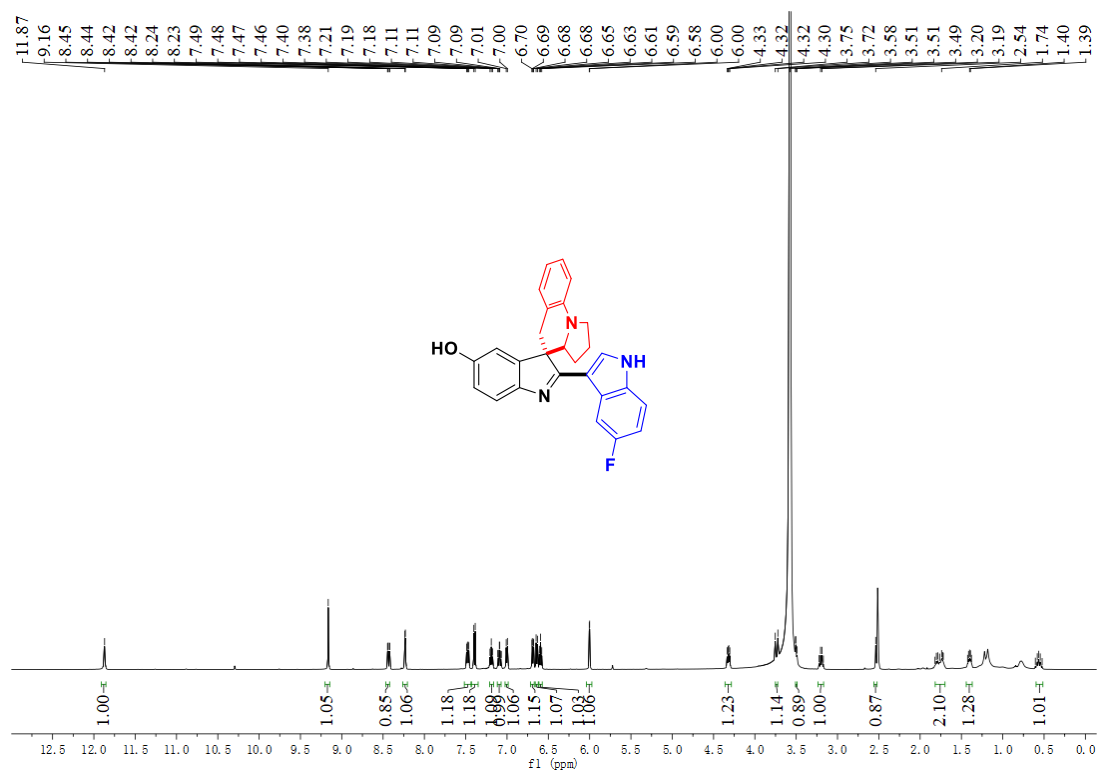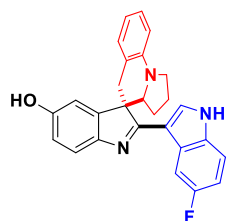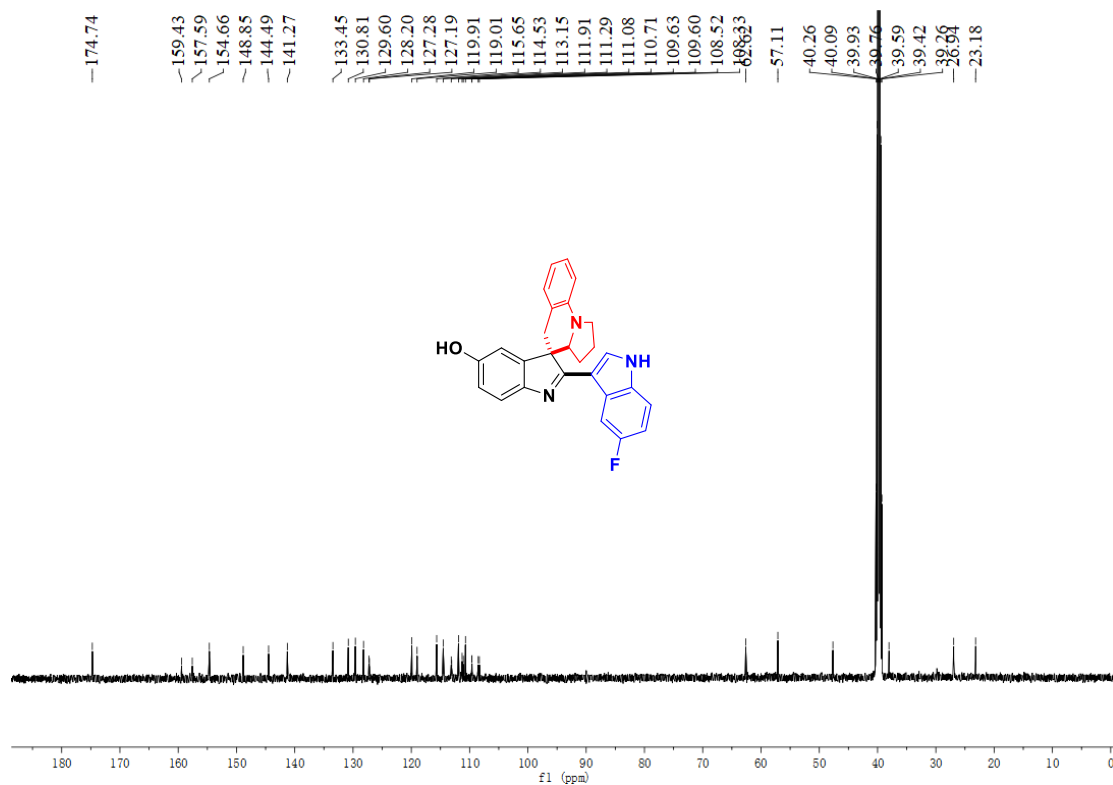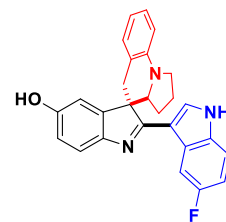

**2-(5-chloro-1H-indol-3-yl)-1',2',3',3a'-tetrahydro-5'H-spiro[indole-3,4'-pyrrolo[1,2-a]quinolin]-5-ol (4k)**

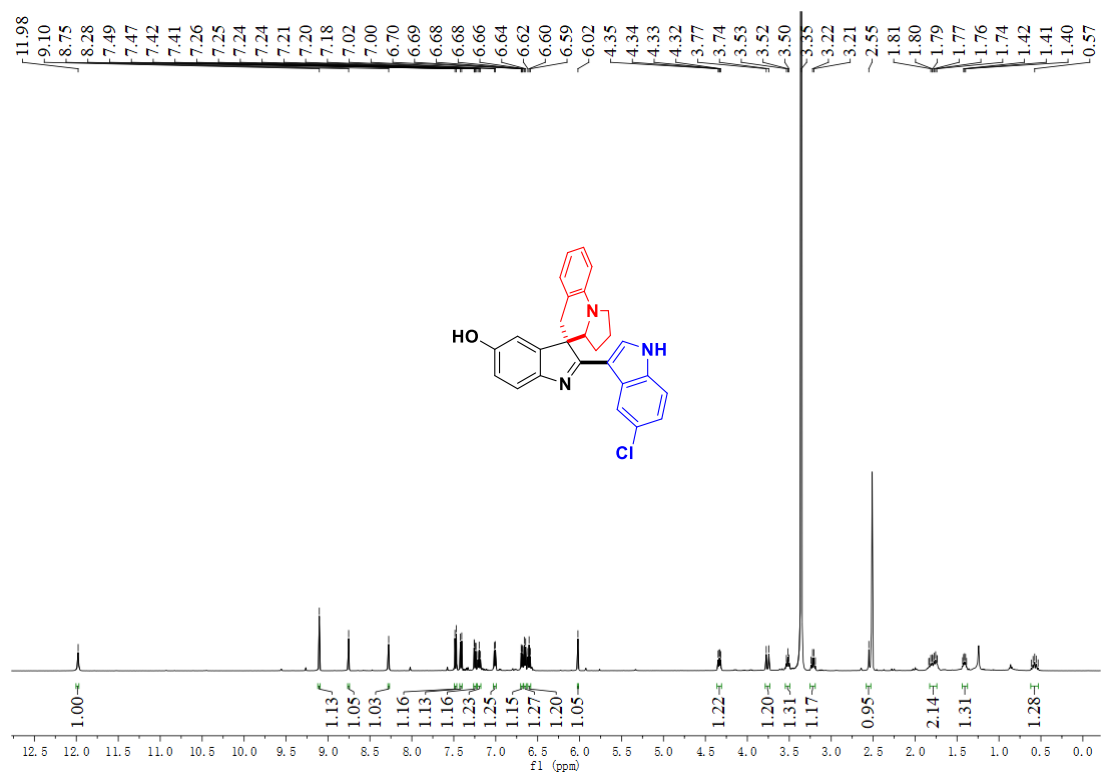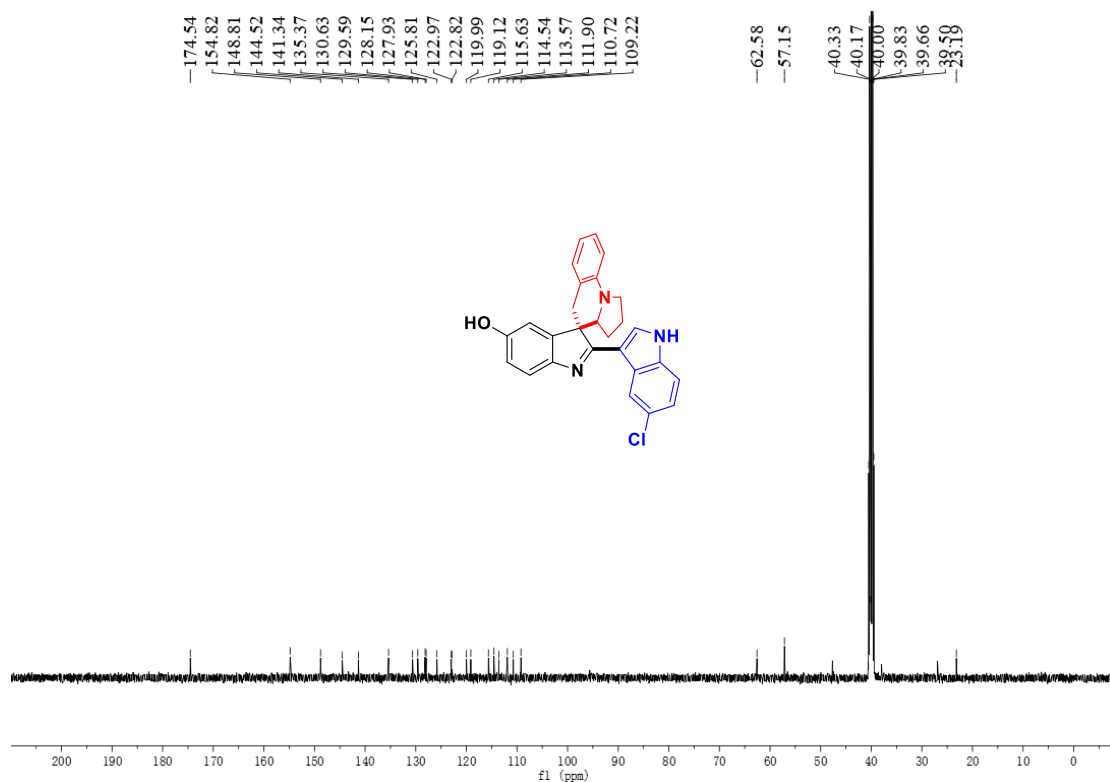

**2-(5-hydroxy-1H-indol-3-yl)-1',2',3',3a'-tetrahydro-5'H-spiro[indole-3,4'-pyrrolo[1,2-a]quinolin]-5-ol (4l)**

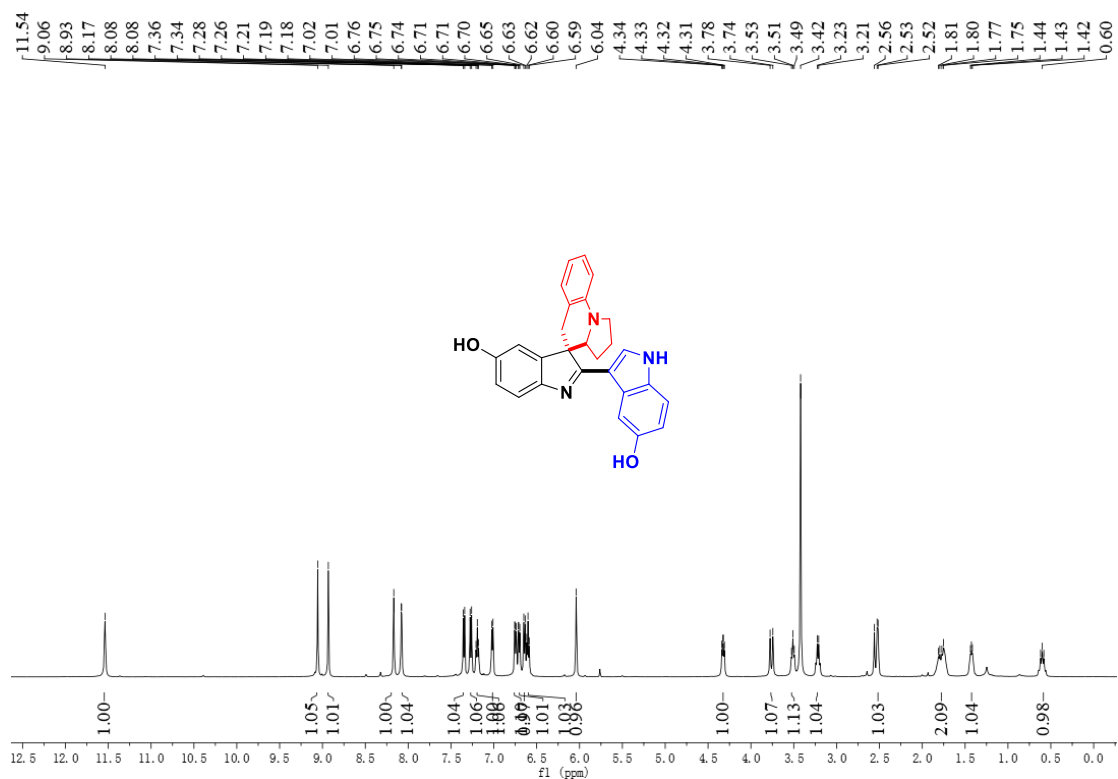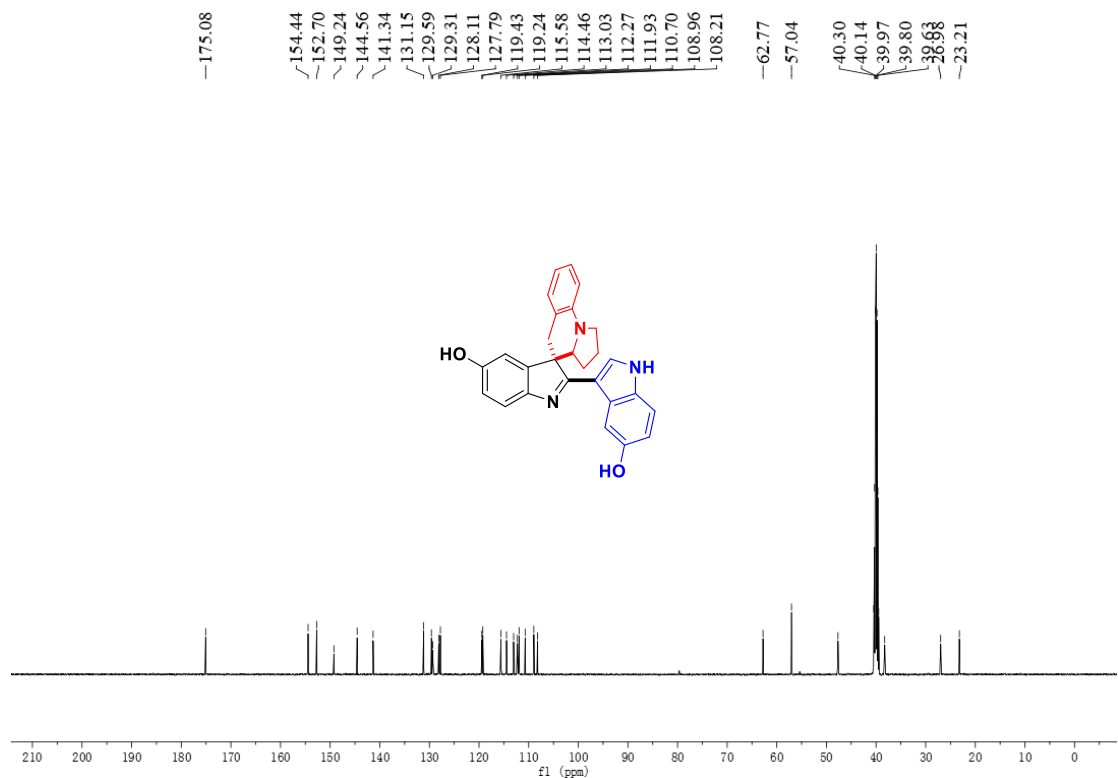

**2-(2-methyl-1H-indol-3-yl)-1',2',3',3a'-tetrahydro-5'H-spiro[indole-3,4'-pyrrolo[1,2-a]quinolin]-5-ol (4m)**

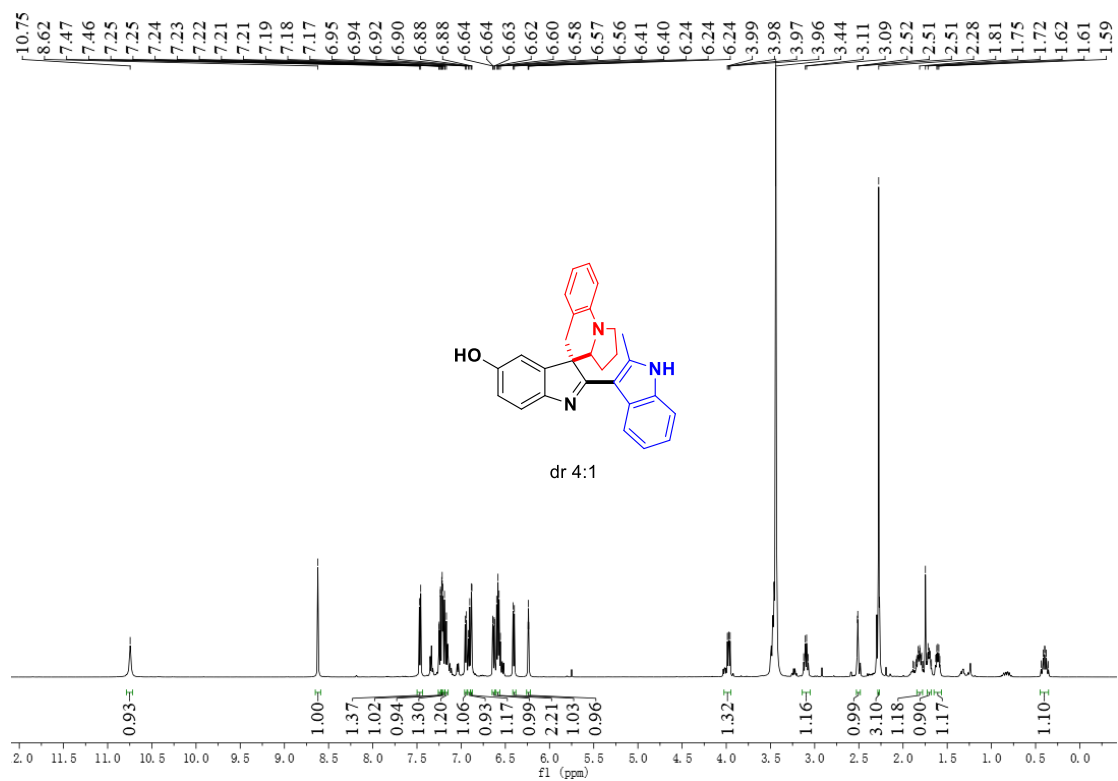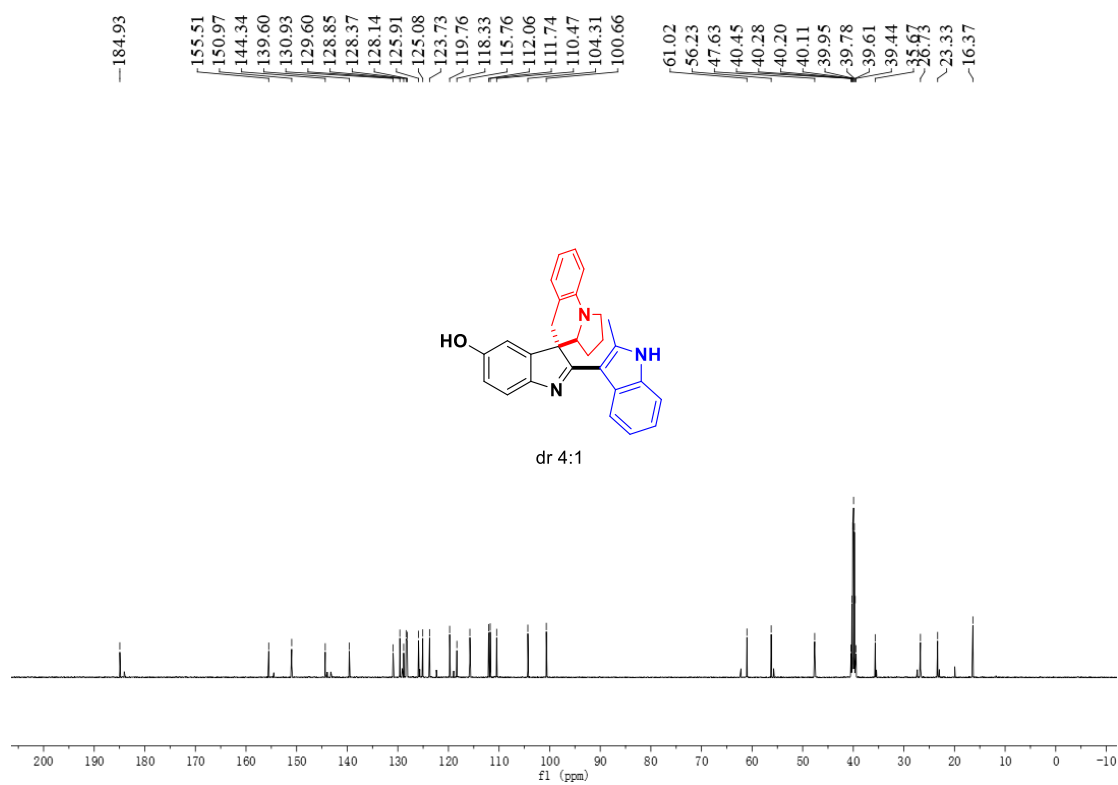

**6'-fluoro-2-(5-hydroxy-1H-indol-3-yl)-1',2',3',3a'-tetrahydro-5'H-spiro[indole-3,4'-pyrrolo[1,2-a]quinolin]-5-ol (4n)**

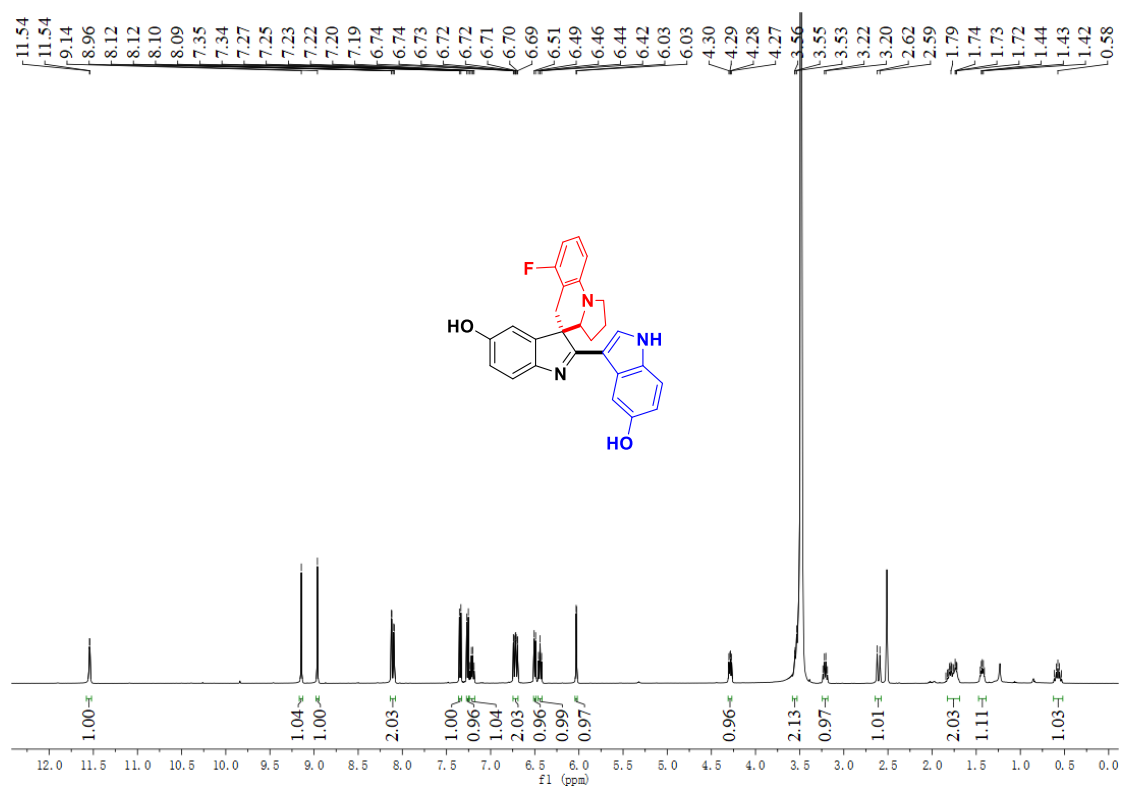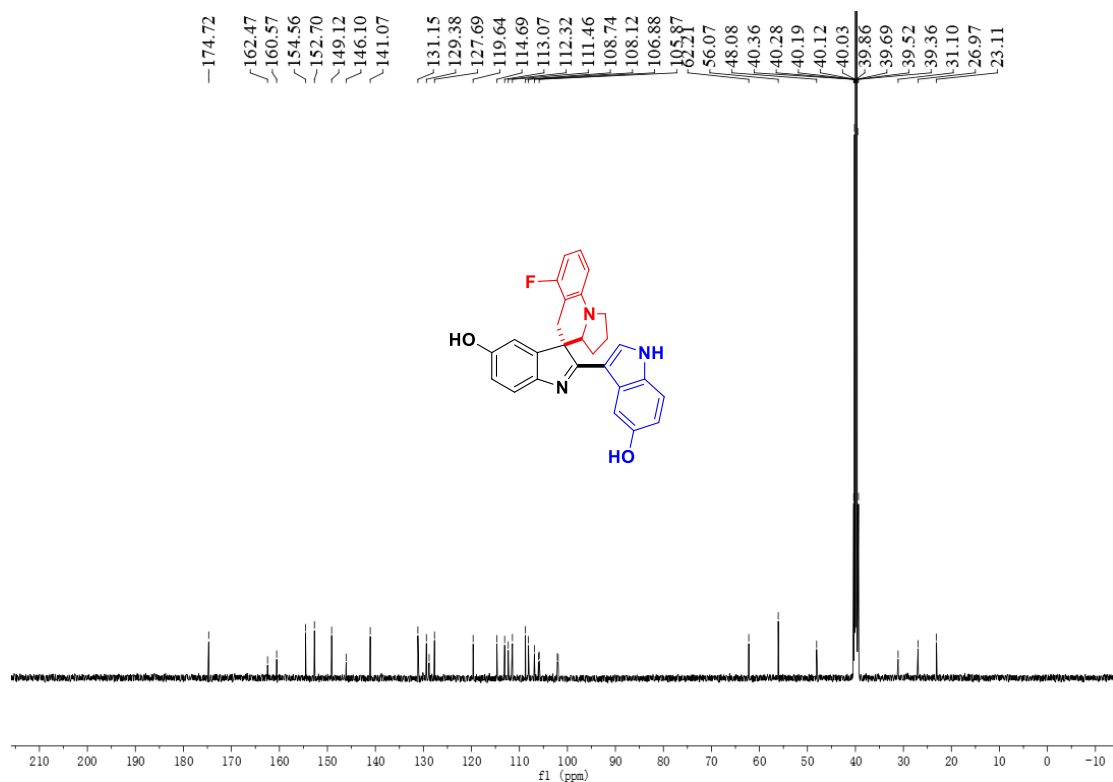



**6'-chloro-2-(5-hydroxy-1H-indol-3-yl)-1',2',3',3a'-tetrahydro-5'H-spiro[indole-3,4'-pyrrolo[1,2-a]quinolin]-5-ol (4o)**

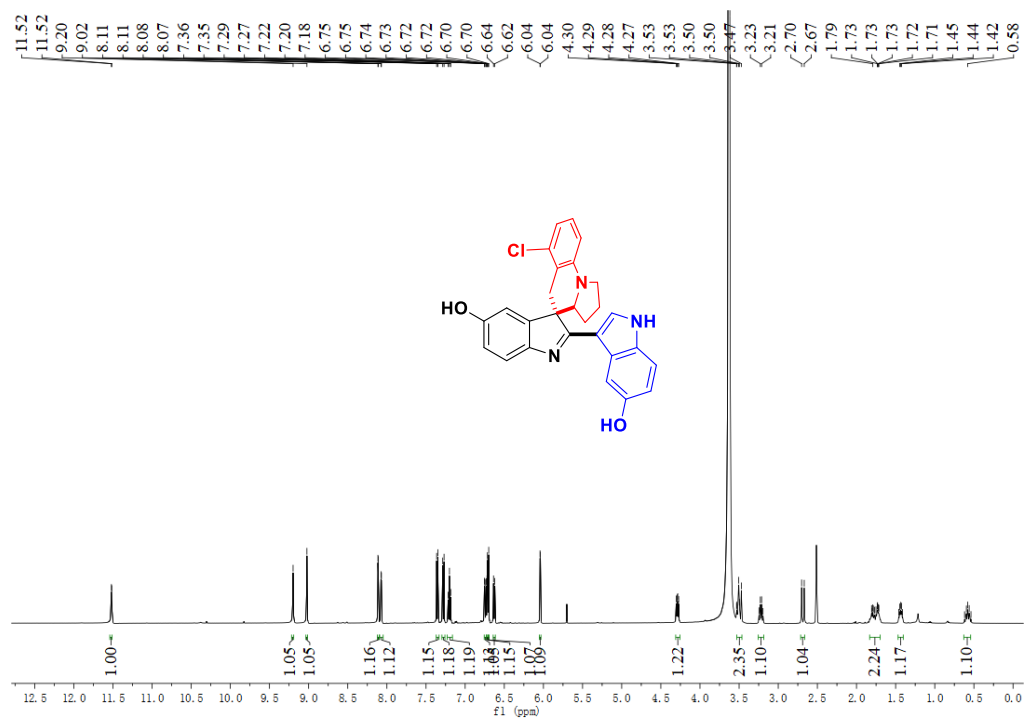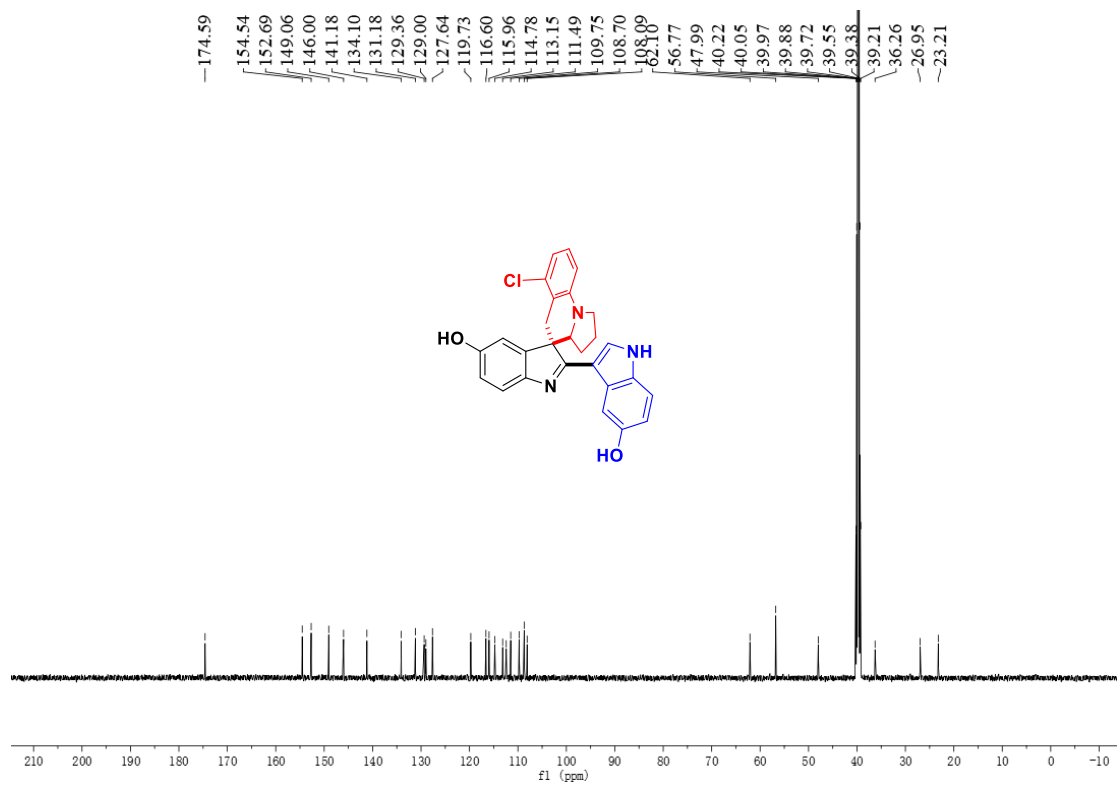

**6'-bromo-2-(5-hydroxy-1H-indol-3-yl)-1',2',3',3a'-tetrahydro-5'H-spiro[indole-3,4'-pyrrolo[1,2-a]quinolin]-5-ol (4p)**

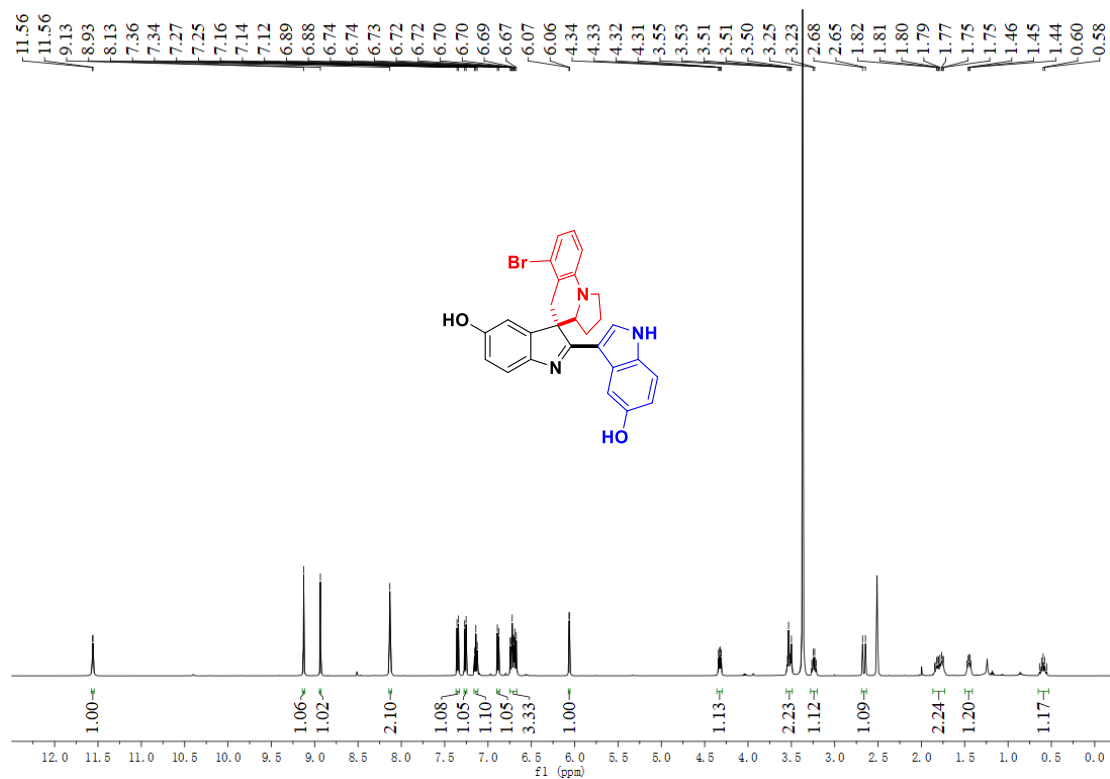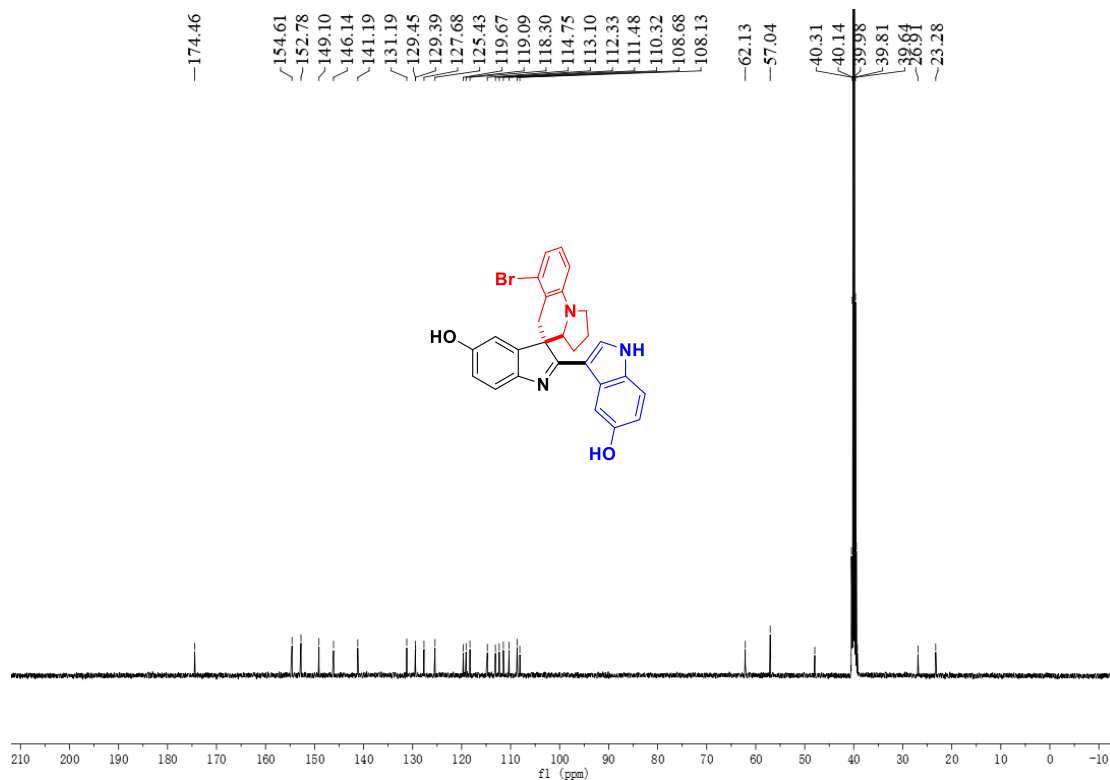

**5'-methyl-2-(5-hydroxy-1H-indol-3-yl)-1',2',3',3a'-tetrahydro-5'H-spiro[indole-3,4'-pyrrolo[1,2-a]quinolin]-5-ol (4q)**

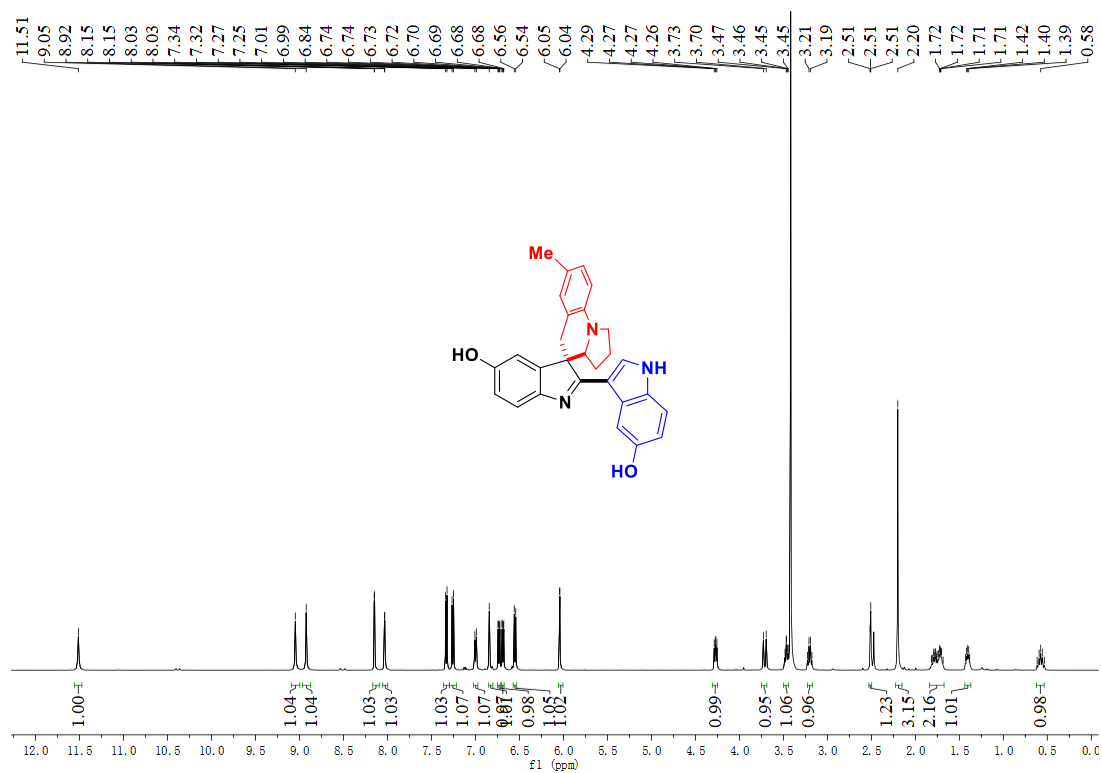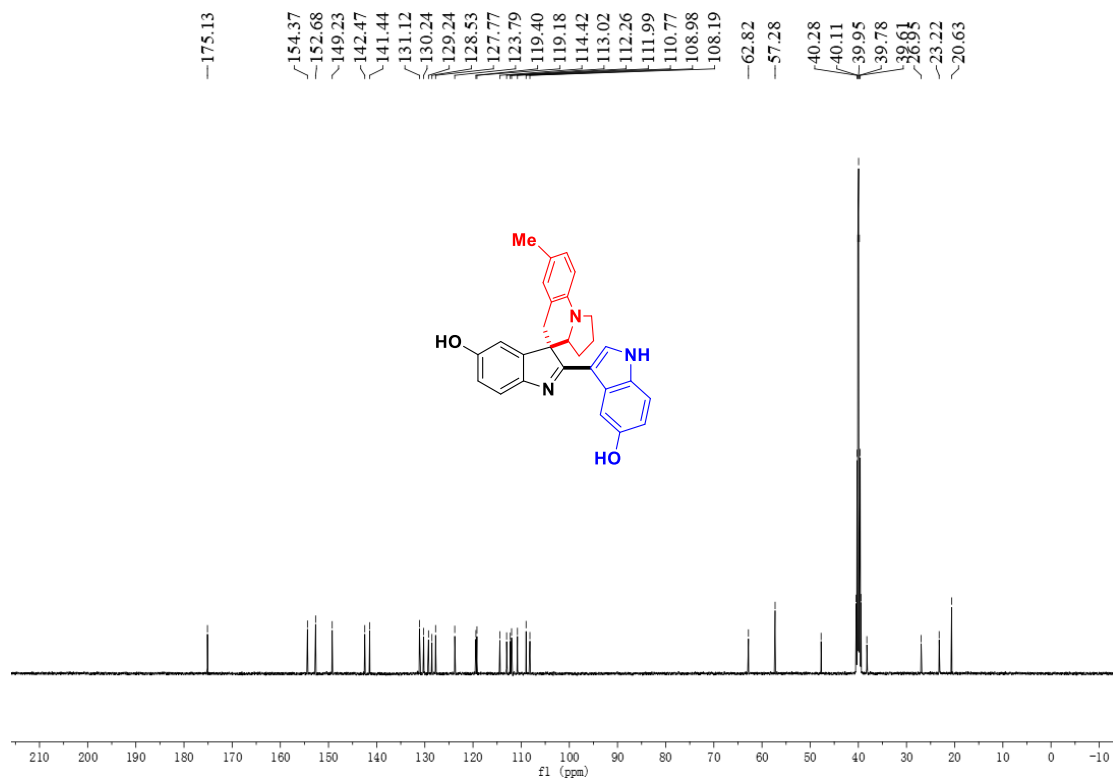

**5'-methoxyl-2-(5-hydroxy-1H-indol-3-yl)-1',2',3',3a'-tetrahydro-5'H-spiro[indole-3,4'-pyrrolo[1,2-a]quinolin]-5-ol (4r)**

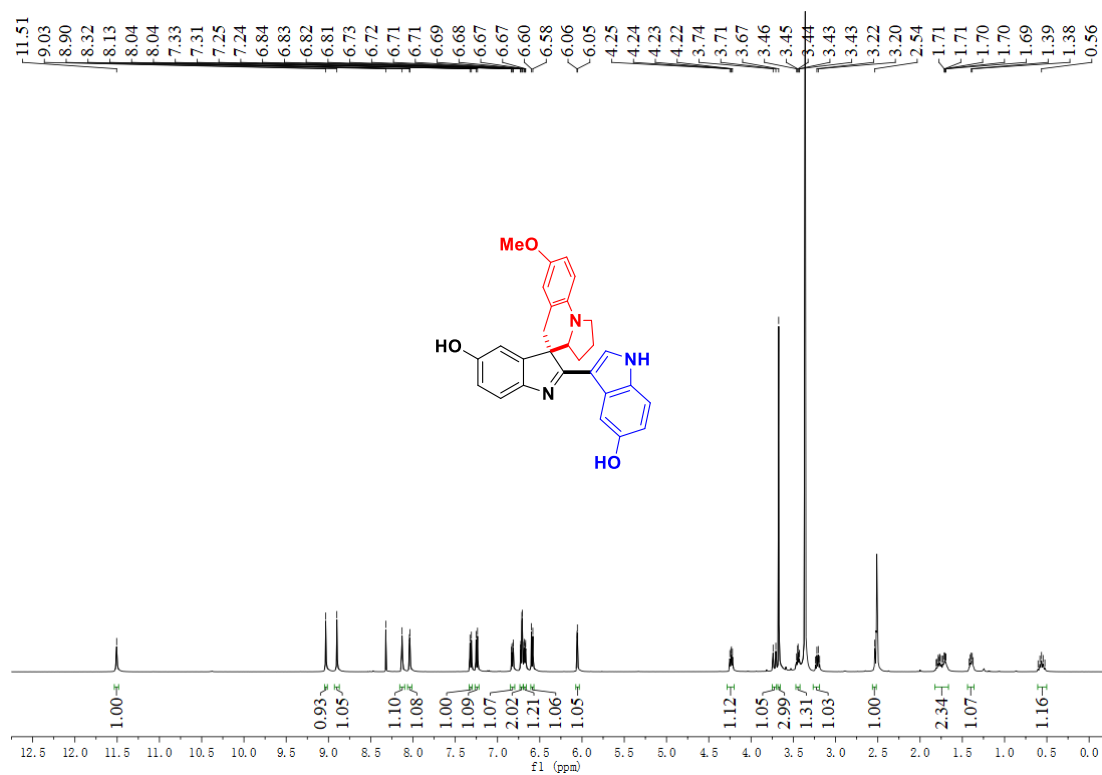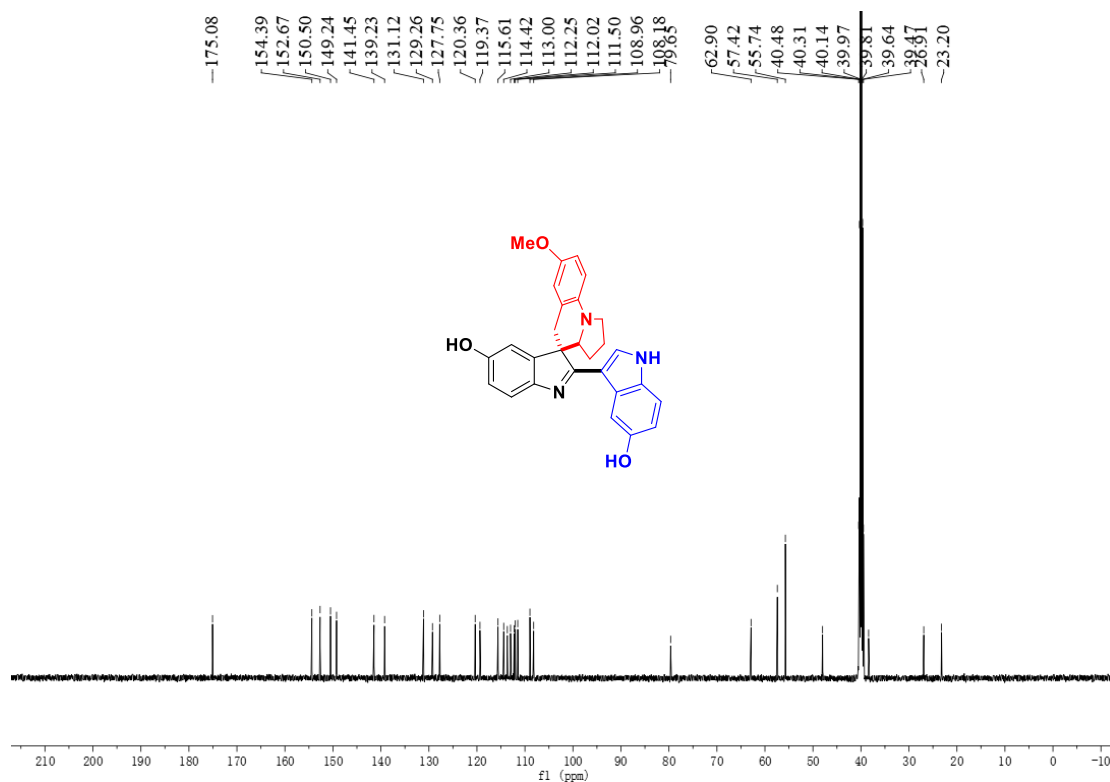

**5'-fluoro-2-(5-hydroxy-1H-indol-3-yl)-1',2',3',3a'-tetrahydro-5'H-spiro[indole-3,4'-pyrrolo[1,2-a]quinolin]-5-ol (4s)**

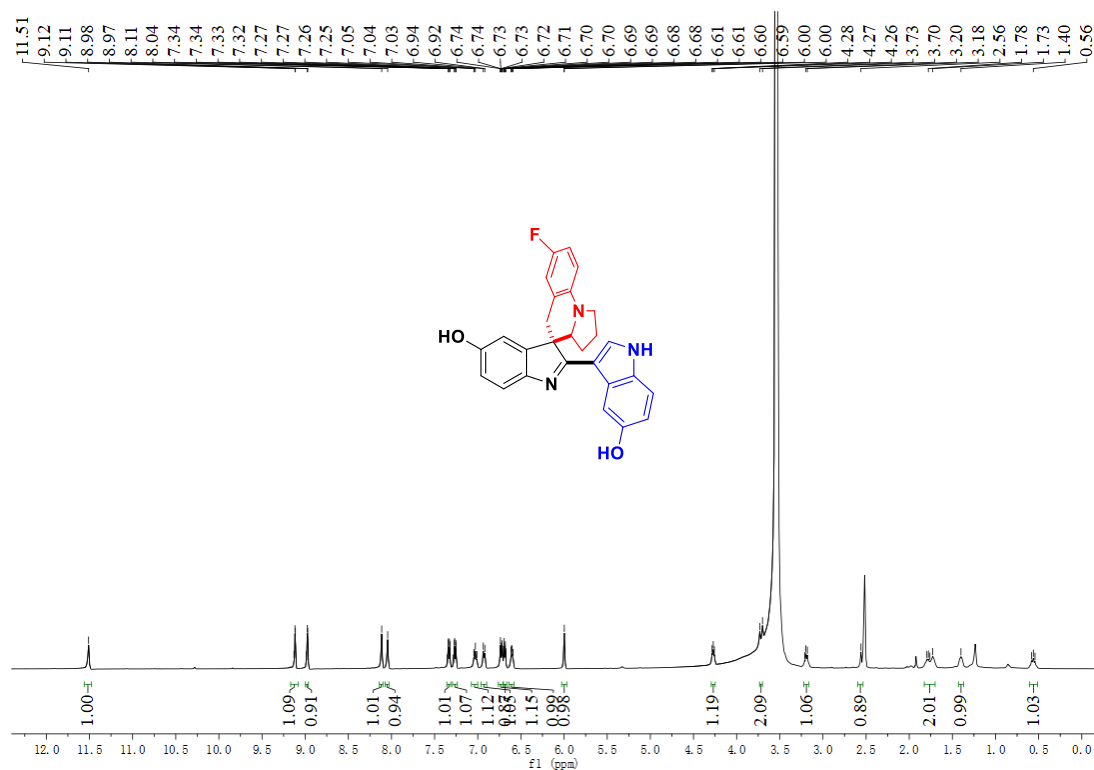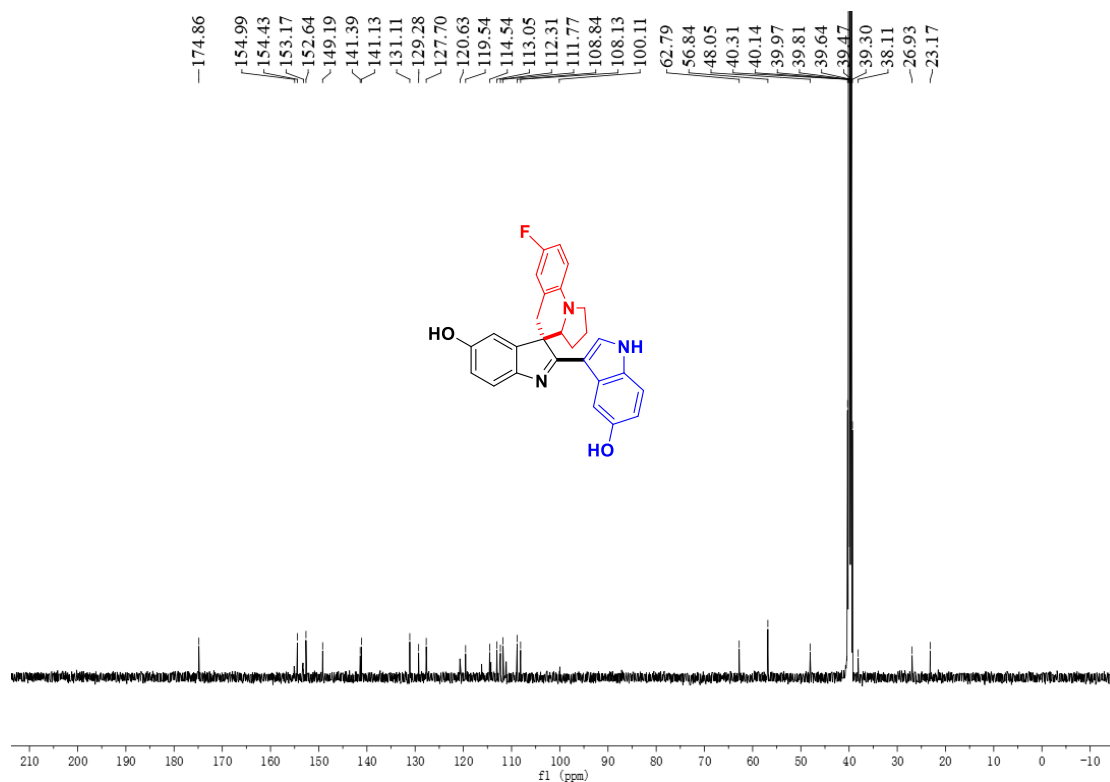

**5'-chloro-2-(5-hydroxy-1H-indol-3-yl)-1',2',3',3a'-tetrahydro-5'H-spiro[indole-3,4'-pyrrolo[1,2-a]quinolin]-5-ol (4t)**

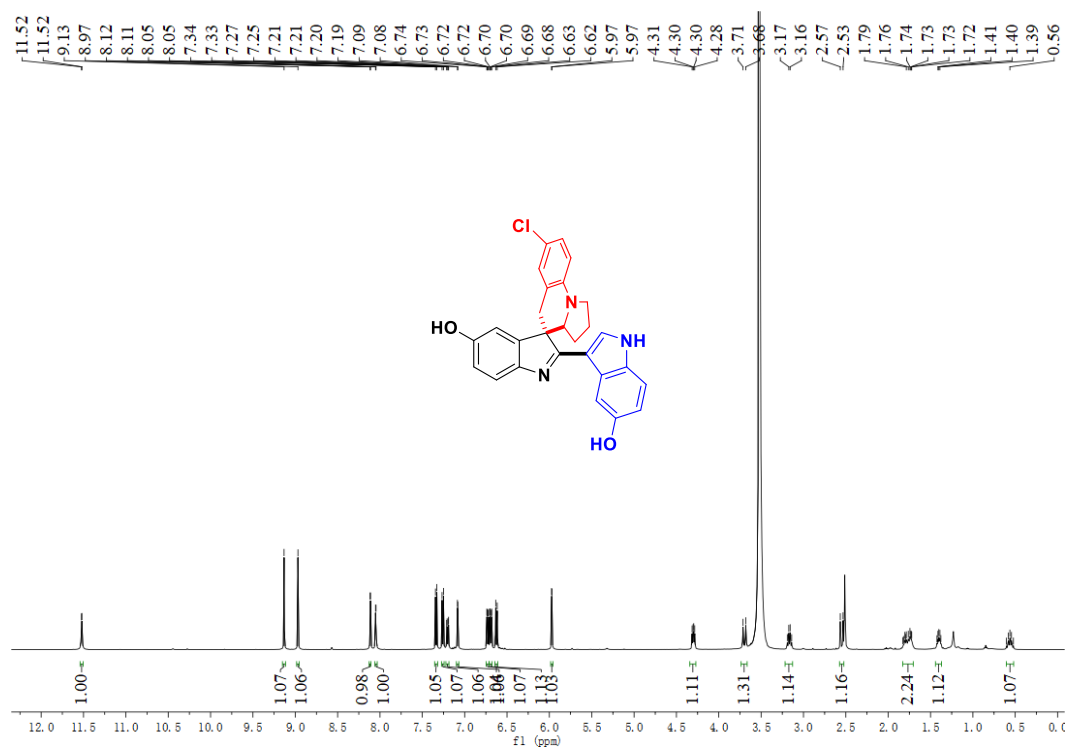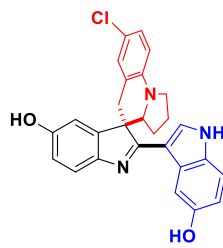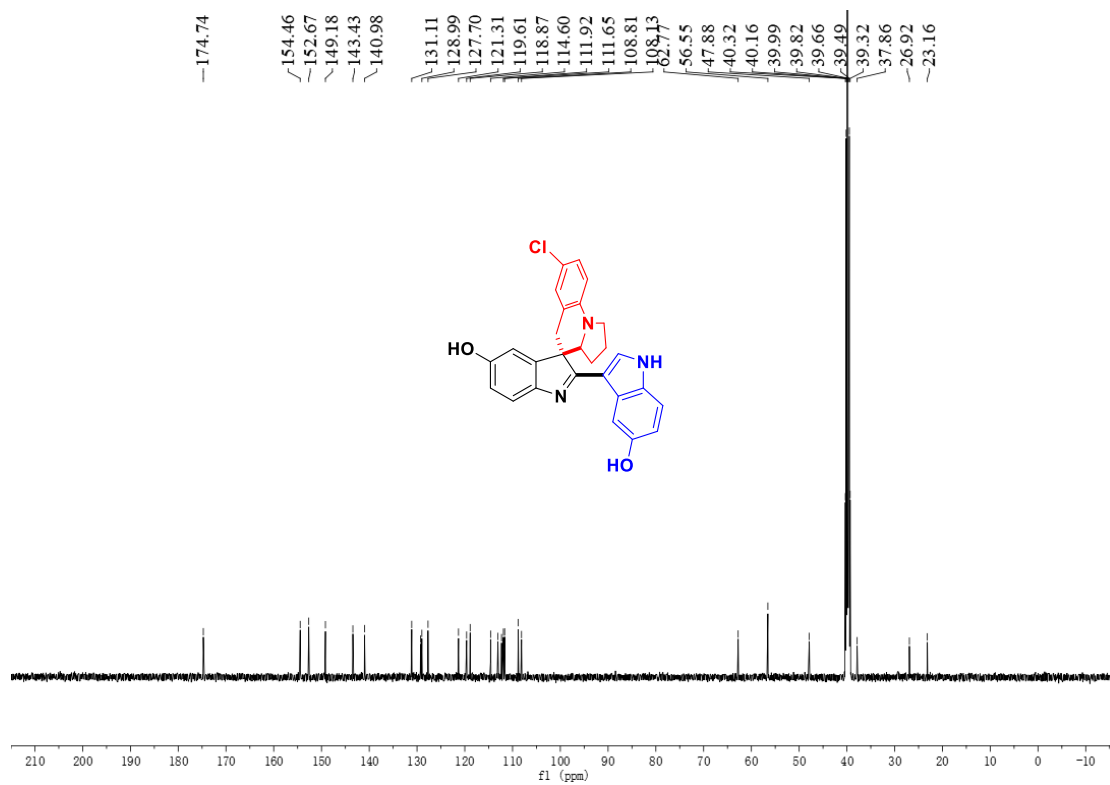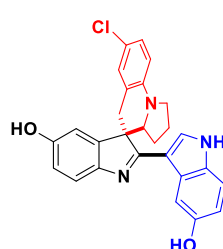

**3'-fluoro-2-(5-hydroxy-1H-indol-3-yl)-1',2',3',3a'-tetrahydro-5'H-spiro[indole-3,4'-pyrrolo[1,2-a]quinolin]-5-ol (4u)**

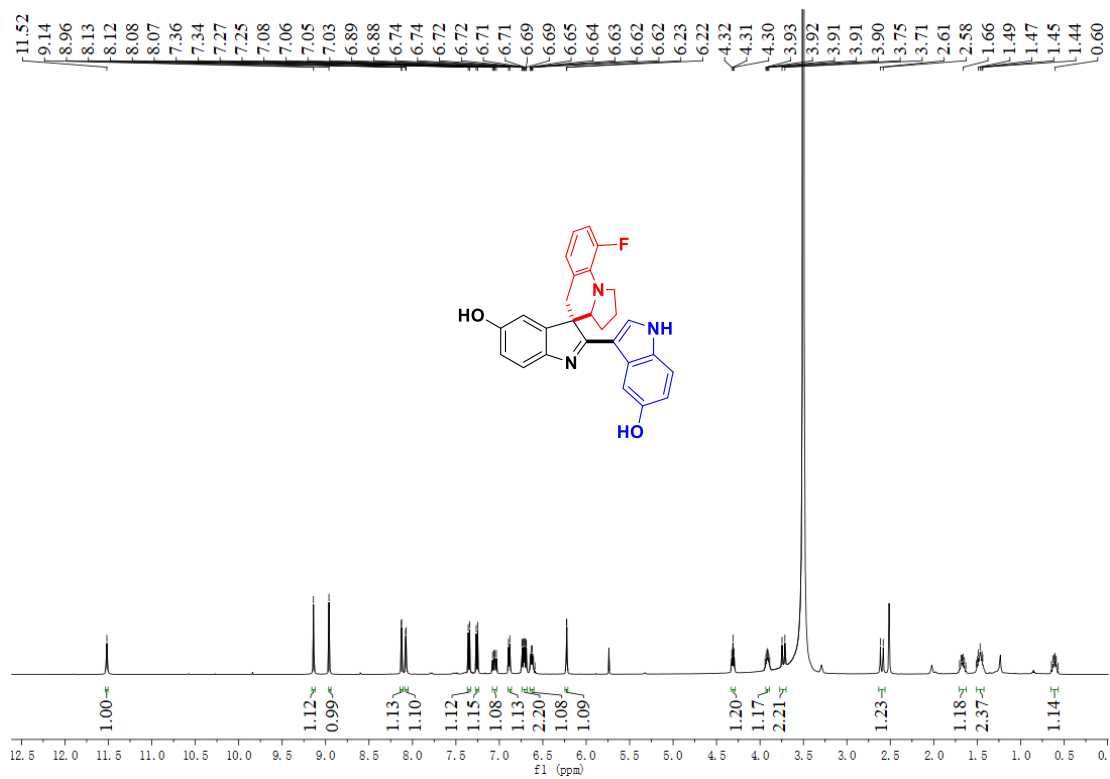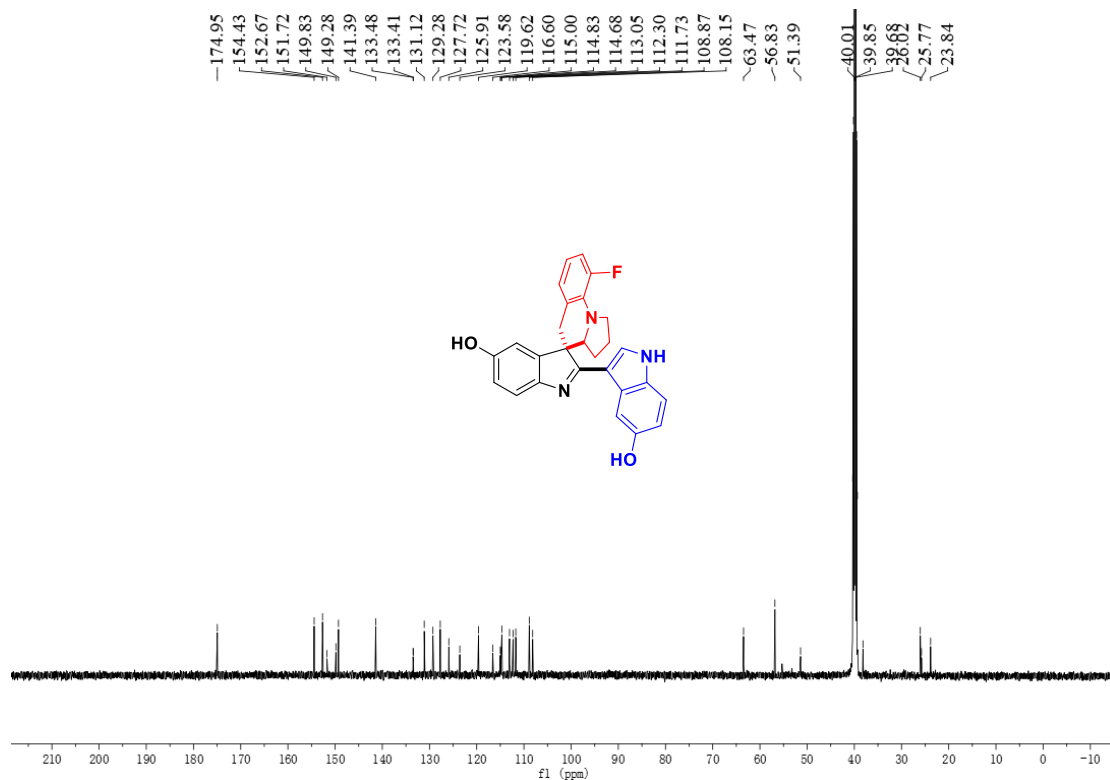

**2'-(5-hydroxy-1H-indol-3-yl)-6a,7,8,9,10,11-hexahydro-5H-spiro[azepino[1,2-a]quinoline-6,3'-indol]-5'-ol (4v)**

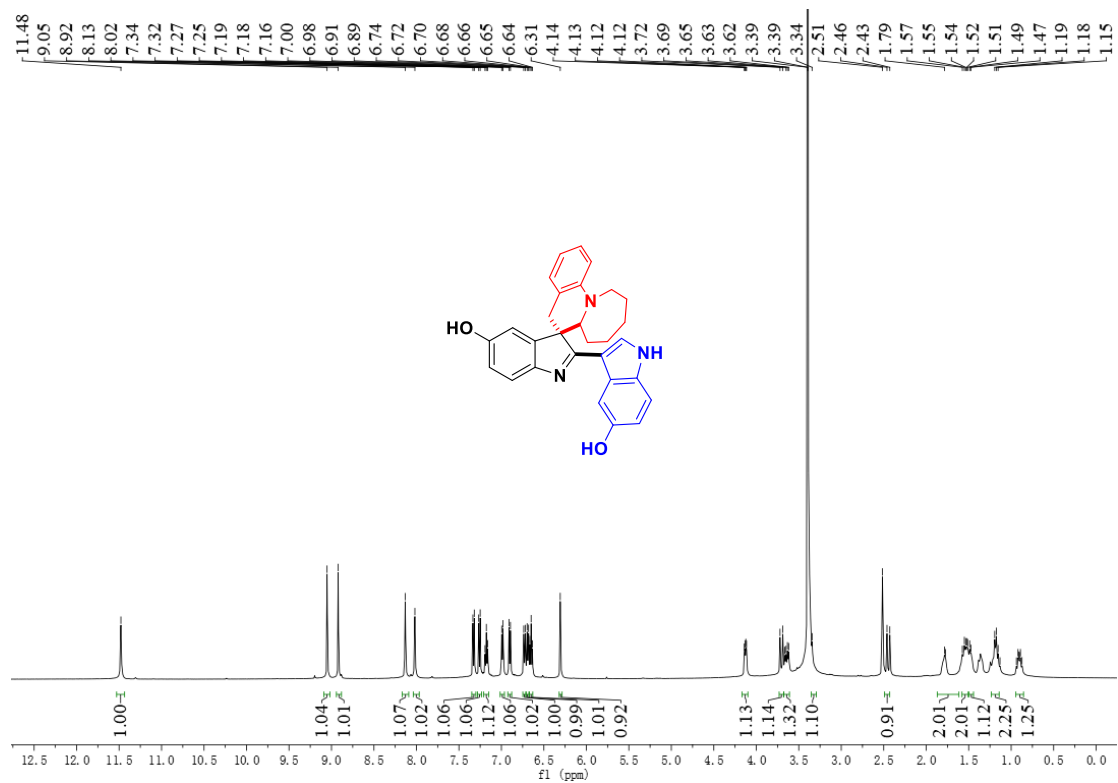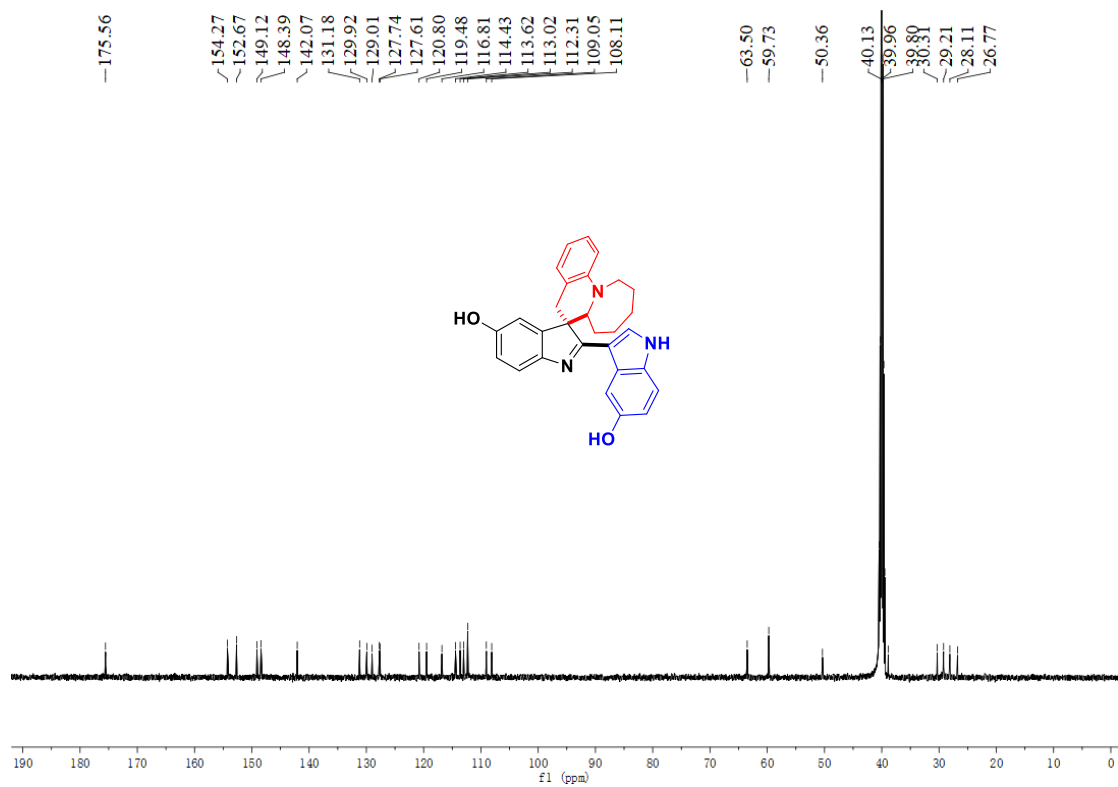



**2-(5-hydroxy-1H-indol-3-yl)-6a',6b',7',8',9',10',10a',11'-octahydro-5'H-spiro[indole-3,6'-isoindolo[2,1-a]quinolin]-5-ol (4w)**

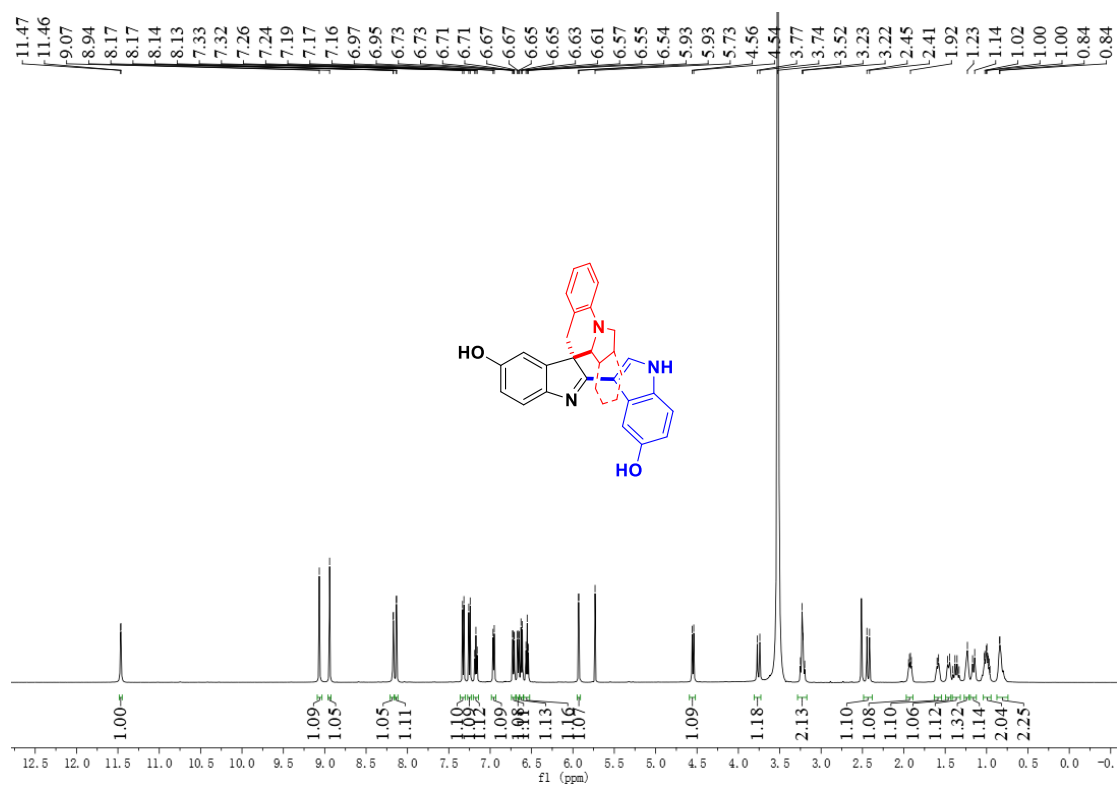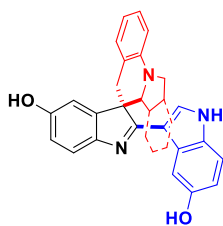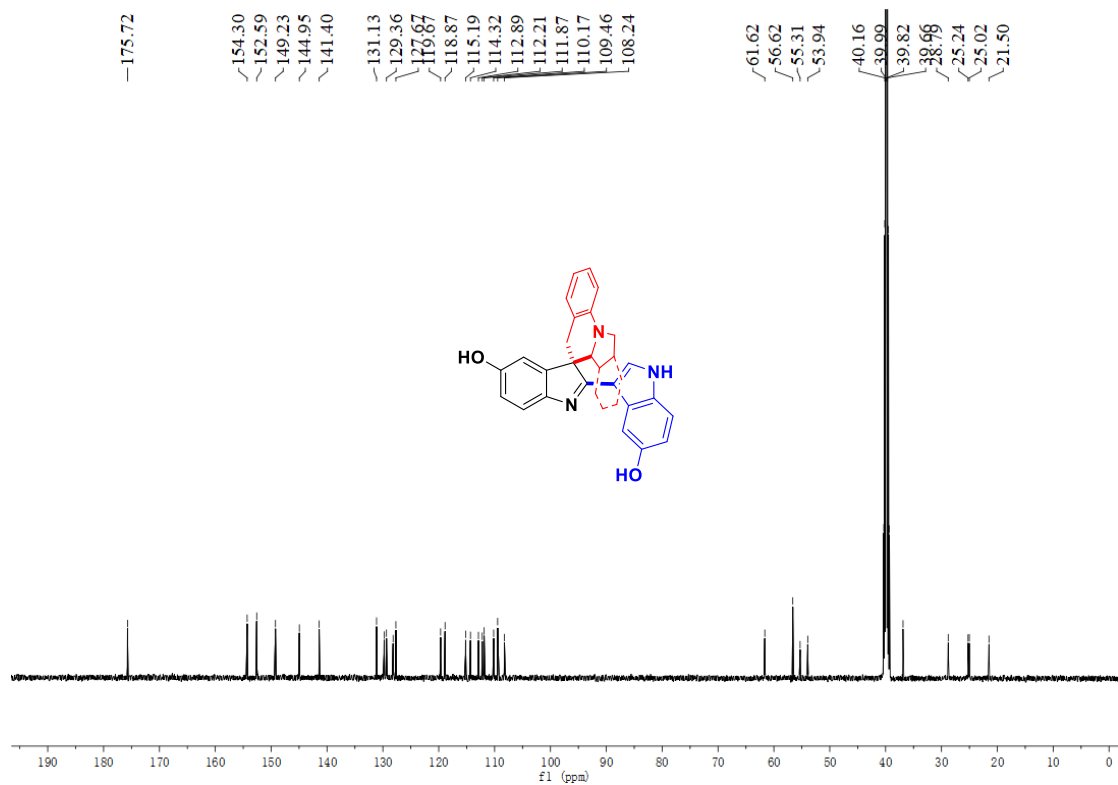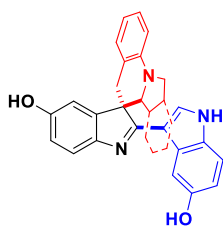

**2-(1-allyl-5-allyloxy-indol-3-yl)-1',2',3',3a'-tetrahydro-5'H-spiro[indole-3,4'-pyrrolo[1,2-a]quinolin]-5-allyloxy (5I)**

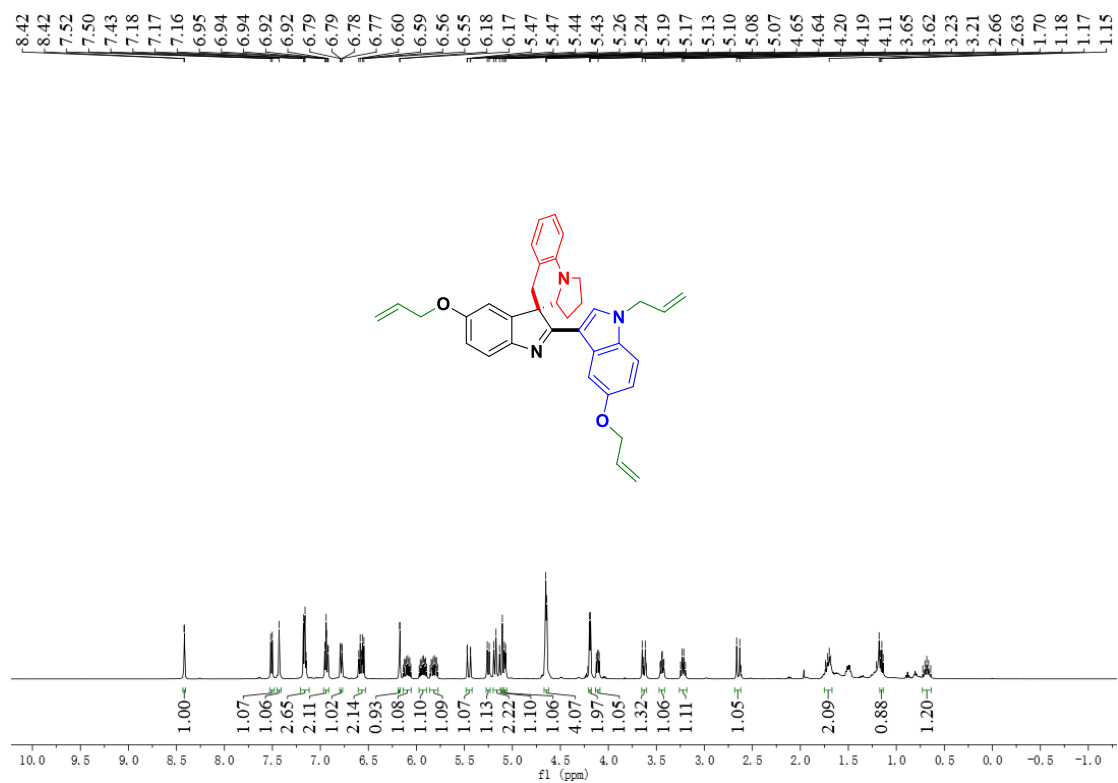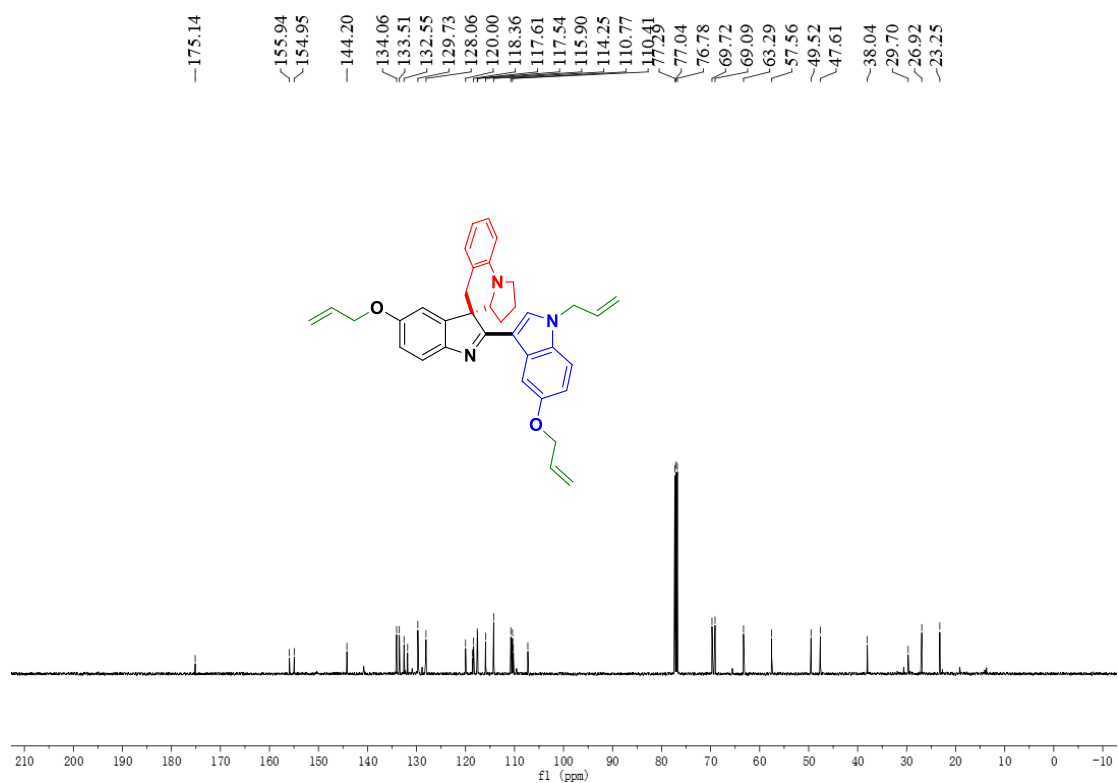

**2-(5-methoxy-1H-indol-3-yl)-1',2',3',3a'-tetrahydro-5'H-spiro[indole-3,4'-pyrrolo[1,2-a]quinolin]-5-trifluoromethanesulfonate (6i)**

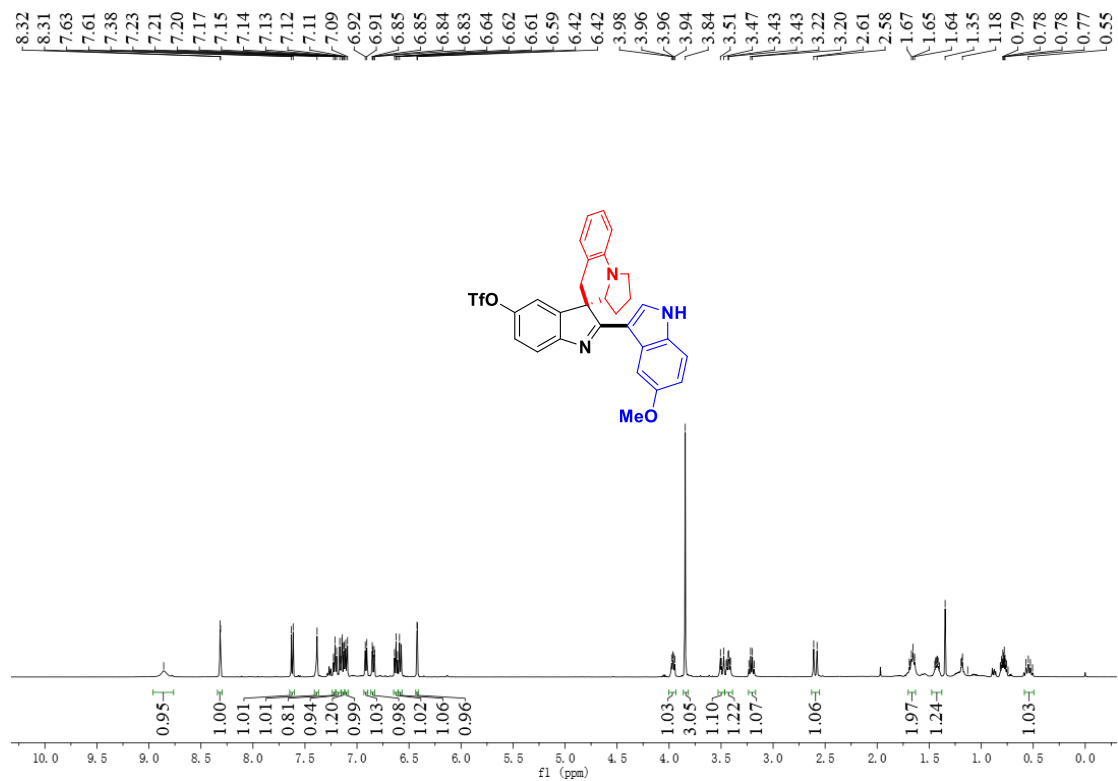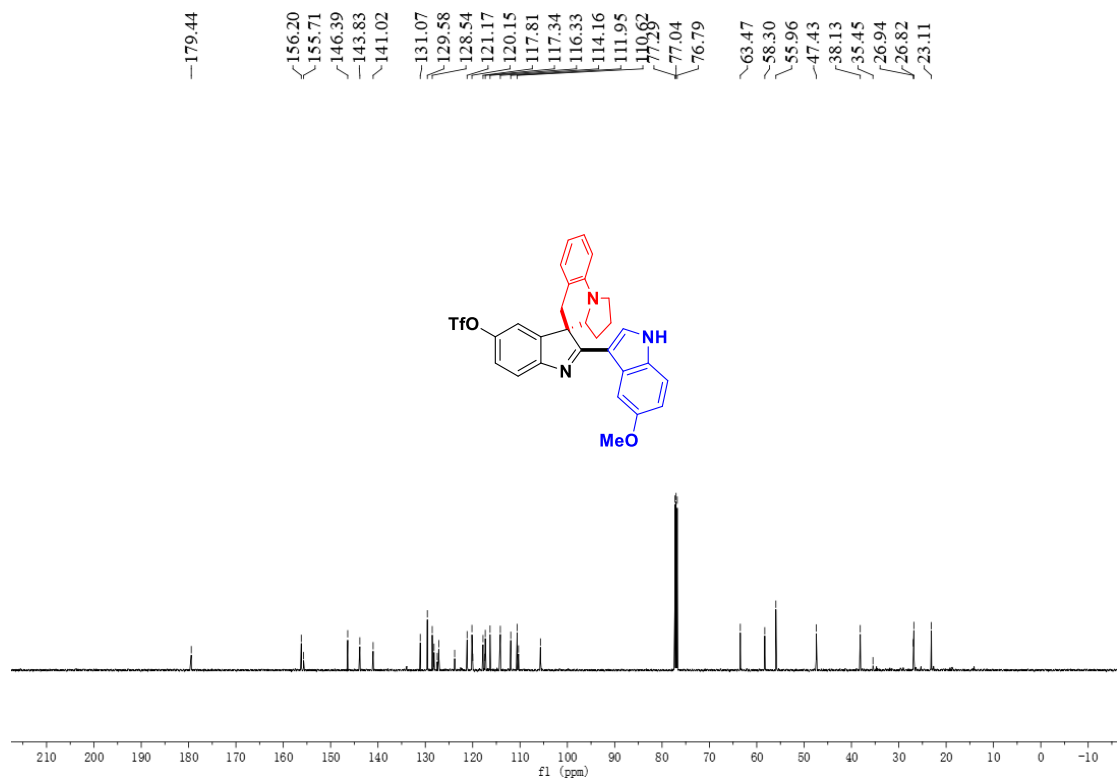

**4-(diethylamino)-1',2',3',3a'-tetrahydro-5'H-spiro[cyclohexane-1,4'-pyrrolo[1,2-a]quinoline]-2,4-dien-6-one (8a)**

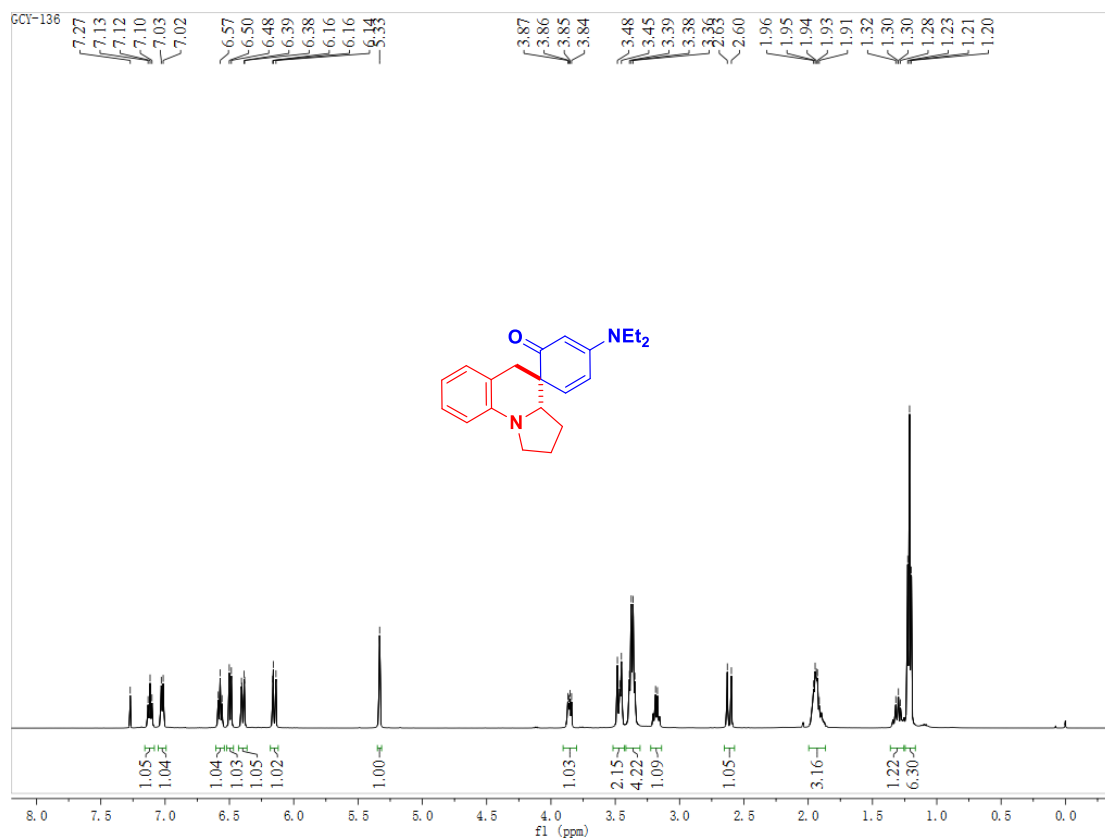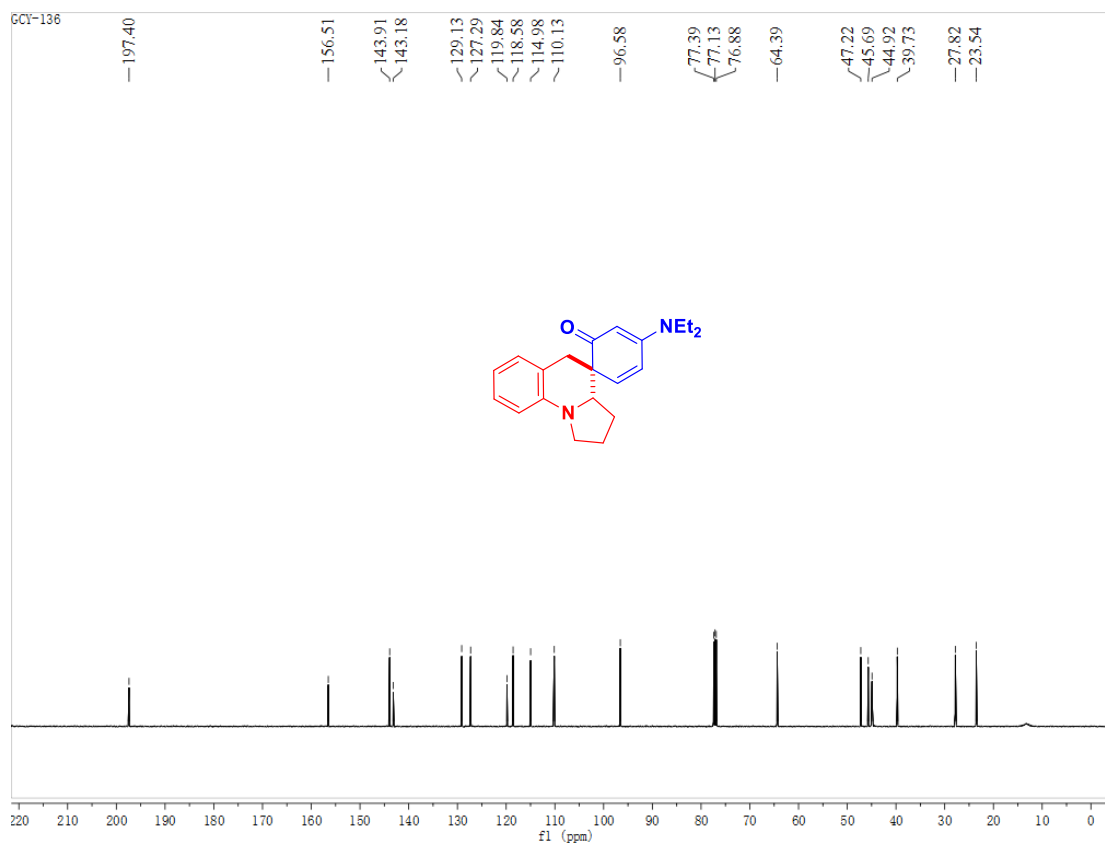

Supplement: d1qo01862k1.pdf [file d1qo01862k1.pdf]
